# Supplementary material for: Digital acoustic surveillance for early detection of respiratory disease outbreaks in Spain: a protocol for an observational study
Source: PubMed Central journal article supplement — BMJ Open. 2021 Jul 2;11(7):e051278. doi: 10.1136/bmjopen-2021-051278 (PMC8257291; doi:10.1136/bmjopen-2021-051278), 2021-07-02
Supplement: bmjopen-2021-051278.draft_revisions.pdf [file bmjopen-2021-051278.draft_revisions.pdf]

# BMJ Open

BMJ Open is committed to open peer review. As part of this commitment we make the peer review history of every article we publish publicly available.

When an article is published we post the peer reviewers' comments and the authors' responses online. We also post the versions of the paper that were used during peer review. These are the versions that the peer review comments apply to.

The versions of the paper that follow are the versions that were submitted during the peer review process. They are not the versions of record or the final published versions. They should not be cited or distributed as the published version of this manuscript.

BMJ Open is an open access journal and the full, final, typeset and author-corrected version of record of the manuscript is available on our site with no access controls, subscription charges or pay-per-view fees (<http://bmjopen.bmj.com>).

If you have any questions on BMJ Open's open peer review process please email [info.bmjopen@bmj.com](mailto:info.bmjopen@bmj.com)

# BMJ Open

## Digital Acoustic Surveillance for Early Detection of Respiratory Disease Outbreaks in Spain: A protocol for an observational study

|                               |                                                                                                                                                                                                                                                                                                                                                                                                                                                                                                                                                                                                                                                                                                                                                                                                                                                                                                                                                                                                                                                                                                                      |
|-------------------------------|----------------------------------------------------------------------------------------------------------------------------------------------------------------------------------------------------------------------------------------------------------------------------------------------------------------------------------------------------------------------------------------------------------------------------------------------------------------------------------------------------------------------------------------------------------------------------------------------------------------------------------------------------------------------------------------------------------------------------------------------------------------------------------------------------------------------------------------------------------------------------------------------------------------------------------------------------------------------------------------------------------------------------------------------------------------------------------------------------------------------|
| Journal:                      | <i>BMJ Open</i>                                                                                                                                                                                                                                                                                                                                                                                                                                                                                                                                                                                                                                                                                                                                                                                                                                                                                                                                                                                                                                                                                                      |
| Manuscript ID                 | bmjopen-2021-051278                                                                                                                                                                                                                                                                                                                                                                                                                                                                                                                                                                                                                                                                                                                                                                                                                                                                                                                                                                                                                                                                                                  |
| Article Type:                 | Protocol                                                                                                                                                                                                                                                                                                                                                                                                                                                                                                                                                                                                                                                                                                                                                                                                                                                                                                                                                                                                                                                                                                             |
| Date Submitted by the Author: | 16-Mar-2021                                                                                                                                                                                                                                                                                                                                                                                                                                                                                                                                                                                                                                                                                                                                                                                                                                                                                                                                                                                                                                                                                                          |
| Complete List of Authors:     | Gabaldon-Figueira, Juan; Clínica Universidad de Navarra, Area de Enfermedades Infecciosas<br>Brew, Joe; Hyfe Inc<br>Doré, Dominique; Centre de Recherche du Centre Hospitalier de l'Université de Montréal, Immunopathology Axis<br>Umashankar, Nita; San Diego State University<br>Chaccour, Juliane ; Clínica Universidad de Navarra, Área de Enfermedades Infecciosas<br>Orrillo, Virginia; University of Navarra, School of Pharmacy and Nutrition<br>Tsang, Lai Yu; Stony Brook University, Global Health Institute<br>Blavia, Isabel; University of Navarra, School of Pharmacy and Nutrition<br>Fernández-Montero , Alejandro ; Clínica Universidad de Navarra<br>Bartolomé, Javier; Servicio Navarro de Salud - Osasunbidea<br>Grandjean Lapierre, Simon; Centre de Recherche du Centre Hospitalier de l'Université de Montréal, Immunopathology Axis; Centre de Recherche du Centre Hospitalier de l'Université de Montréal, Department of Microbiology, Infectious Diseases and Immunology<br>Chaccour, C; Universitat de Barcelona, ISGlobal; Clínica Universidad de Navarra, Area of Infectious Diseases |
| Keywords:                     | COVID-19, Respiratory infections < THORACIC MEDICINE, Epidemiology < TROPICAL MEDICINE                                                                                                                                                                                                                                                                                                                                                                                                                                                                                                                                                                                                                                                                                                                                                                                                                                                                                                                                                                                                                               |
|                               |                                                                                                                                                                                                                                                                                                                                                                                                                                                                                                                                                                                                                                                                                                                                                                                                                                                                                                                                                                                                                                                                                                                      |

SCHOLARONE™  
Manuscripts

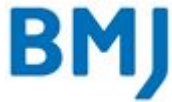

I, the Submitting Author has the right to grant and does grant on behalf of all authors of the Work (as defined in the below author licence), an exclusive licence and/or a non-exclusive licence for contributions from authors who are: i) UK Crown employees; ii) where BMJ has agreed a CC-BY licence shall apply, and/or iii) in accordance with the terms applicable for US Federal Government officers or employees acting as part of their official duties; on a worldwide, perpetual, irrevocable, royalty-free basis to BMJ Publishing Group Ltd ("BMJ") its licensees and where the relevant Journal is co-owned by BMJ to the co-owners of the Journal, to publish the Work in this journal and any other BMJ products and to exploit all rights, as set out in our [licence](#).

The Submitting Author accepts and understands that any supply made under these terms is made by BMJ to the Submitting Author unless you are acting as an employee on behalf of your employer or a postgraduate student of an affiliated institution which is paying any applicable article publishing charge ("APC") for Open Access articles. Where the Submitting Author wishes to make the Work available on an Open Access basis (and intends to pay the relevant APC), the terms of reuse of such Open Access shall be governed by a Creative Commons licence – details of these licences and which [Creative Commons](#) licence will apply to this Work are set out in our licence referred to above.

Other than as permitted in any relevant BMJ Author's Self Archiving Policies, I confirm this Work has not been accepted for publication elsewhere, is not being considered for publication elsewhere and does not duplicate material already published. I confirm all authors consent to publication of this Work and authorise the granting of this licence.

1  
2  
3  
4 **1 Digital Acoustic Surveillance for Early Detection of Respiratory Disease Outbreaks in Spain:**  
5 **2 A protocol for an observational study**  
6

7  
8  
9  
10  
11  
12  
13  
14  
15  
16  
17  
18  
19  
20  
21  
22  
23  
24  
25  
26  
27  
28  
29  
30  
31  
32  
33  
34  
35  
36  
37  
38  
39  
40  
41  
42  
43  
44  
45  
46  
47  
48  
49  
50  
51  
52  
53  
54  
55  
56  
57  
58  
59  
60

3

4 Juan C. Gabaldón-Figueira<sup>a\*</sup> [[jgabaldonfi@unav.es](mailto:jgabaldonfi@unav.es)](ORCID: 0000-0002-2525-0263)

5 Joe Brew<sup>b</sup> [[joe@hyfe.ai](mailto:joe@hyfe.ai)] (ORCID: 0000-0002-4119-0117)

6 Dominique Hélène Doré<sup>c</sup> [[dominique.helene.dore@umontreal.ca](mailto:dominique.helene.dore@umontreal.ca)]

7 Nita Umashankar<sup>d</sup> [[numashankar@sdsu.edu](mailto:numashankar@sdsu.edu)]

8 Juliane Chaccour<sup>a</sup> [[jchaccour@gmail.com](mailto:jchaccour@gmail.com)] (ORCID: 0000-0001-5611-9690)

9 Virginia Orrillo<sup>e</sup> [[vorrillo@alumni.unav.es](mailto:vorrillo@alumni.unav.es)]

10 Lai Yu Tsang<sup>f</sup> [[Lai.Tsang@stonybrookmedicine.edu](mailto:Lai.Tsang@stonybrookmedicine.edu)]

11 Isabel Blavia<sup>e</sup> [[iblavia@alumni.unav.es](mailto:iblavia@alumni.unav.es)]

12 Alejandro Fernandez-Montero<sup>a</sup> [[afmontero@unav.es](mailto:afmontero@unav.es)]

13 Javier Bartolomé<sup>g</sup> [[fjbr@medena.es](mailto:fjbr@medena.es)]

14 Simon Grandjean Lapierre<sup>c,i †</sup>

15 [[simon.grandjean.lapierre@umontreal.ca](mailto:simon.grandjean.lapierre@umontreal.ca)] (ORCID 0000-0003-3646-1573)

16 Carlos Chaccour<sup>h, a, j †</sup> [[carlos.chaccour@isglobal.org](mailto:carlos.chaccour@isglobal.org)] (ORCID 0000-0001-9812-050X)

17

18 \*Corresponding author

19 †These authors contributed equally

20 **Corresponding author's contact information**

21 Juan C. Gabaldón-Figueira

22 E: [jgabaldonfi@unav.es](mailto:jgabaldonfi@unav.es)

23 Address: Av. Pío XII, 36, Pamplona, Navarra, Spain. 31008.

24

25 **Affiliations**

26 <sup>a</sup> Clínica Universidad de Navarra, University of Navarra, Pamplona, Spain

- 1  
2  
3 27 <sup>b</sup> Hyfe Inc, Wilmington, DE, USA  
4  
5 28 <sup>c</sup> Immunopathology Axis, Centre de Recherche du Centre Hospitalier de l'Université de  
6  
7 29 Montréal, Montréal, Québec, Canada  
8  
9 30 <sup>d</sup> San Diego State University, San Diego, CA, USA  
10  
11 31 <sup>e</sup> School of Pharmacy and Nutrition, University of Navarra, Pamplona, Spain  
12  
13 32 <sup>f</sup> Stony Brook University, Global Health Institute, Stony Brook, New York, USA  
14  
15 33 <sup>g</sup> Servicio Navarro de Salud- Osasunbidea, Zizur Mayor, Spain  
16  
17 34 <sup>h</sup> ISGlobal, Hospital Clínic - Universitat de Barcelona, Barcelona, Spain  
18  
19 35 <sup>i</sup> Department of Microbiology, Infectious Diseases and Immunology, Université de Montréal,  
20  
21 36 Montréal, Québec, Canada  
22  
23 37 <sup>j</sup> Ifakara Health Institute, United Republic of Tanzania.  
24  
25  
26  
27  
28  
29  
30  
31  
32  
33  
34  
35  
36  
37  
38  
39  
40  
41  
42  
43  
44  
45  
46  
47  
48  
49  
50  
51  
52  
53  
54  
55  
56  
57  
58  
59  
60

39 **Word count:** 3104

1  
2  
3 **40 Abstract**

4  
5 **41 Introduction**

6  
7  
8 Cough is a landmark symptom of COVID-19 and other respiratory illnesses. However,  
9  
10 objectively measuring its frequency and evolution is hindered by the lack of reliable and  
11  
12 scalable monitoring systems. This can be overcome by newly developed artificial intelligence  
13  
14 models that exploit the portability of smartphones. In the context of the ongoing COVID-19  
15  
16 pandemic, cough detection for respiratory disease syndromic surveillance represents a simple  
17  
18 means for early outbreak detection and disease surveillance. In this protocol, we evaluate the  
19  
20 ability of population-based digital cough surveillance to predict the incidence of respiratory  
21  
22 diseases at population level in Navarra, Spain, while assessing individual determinants of  
23  
24 uptake of these platforms.  
25  
26

27  
28 **51 Methods and analysis**

29  
30 Participants in the Cendea de Cizur, Zizur Mayor, or attending the local University of Navarra  
31  
32 (Pamplona) will be invited to monitor their night-time cough using the smartphone app Hyfe  
33  
34 Cough Tracker™. Detected coughs will be aggregated in time and space. Incidence of  
35  
36 COVID-19, and other diagnosed respiratory diseases within the participants cohort, and the  
37  
38 study area and population will be collected from local health facilities and used to carry out  
39  
40 an ARIMA analysis on those independent time series. In a mixed-methods design, we will  
41  
42 explore barriers and facilitators of continuous digital cough monitoring by evaluating  
43  
44 participation patterns, socio demographic characteristics. Participants will fill an  
45  
46 acceptability questionnaire and a subgroup will participate in focus group discussions.  
47  
48  
49

50  
51 **61 Ethics and dissemination**

52  
53 Ethics approval was obtained from the ethics committee of the Centre Hospitalier de  
54  
55 l'Université de Montréal, Canada and the Medical Research Ethics Committee of Navarre,  
56  
57 Spain. Preliminary findings will be shared with civil and health authorities and reported to  
58  
59  
60

1  
2  
3  
4  
5  
6  
7  
8  
9  
10  
11  
12  
13  
14  
15  
16  
17  
18  
19  
20  
21  
22  
23  
24  
25  
26  
27  
28  
29  
30  
31  
32  
33  
34  
35  
36  
37  
38  
39  
40  
41  
42  
43  
44  
45  
46  
47  
48  
49  
50  
51  
52  
53  
54  
55  
56  
57  
58  
59  
60

65 individual participants. Results will be submitted for publication in peer-reviewed scientific  
66 journals and international conferences.

67 **Trial Registration Number**

68 [clinicaltrials.gov/NCT04762693](http://clinicaltrials.gov/NCT04762693)

69  
70  
71  
72  
73  
74  
75  
76  
77  
78  
79  
80  
81  
82  
83  
84  
85  
86  
87  
88  
89  
90

For peer review only

1  
2  
3 91 **Strengths and limitations of this study**  
4

5 92 1. This is the first study to evaluate the utility of artificial intelligence models and  
6  
7 93 smartphone applications for cough detection at population level.

8  
9  
10 94 2. The studied approach has the potential to be rapidly scalable even within  
11  
12 95 underdeveloped public health systems.

13  
14 96 3. Qualitative methods will improve the understanding of barriers and facilitators  
15  
16 97 affecting the uptake of cough detection smartphone applications and participation in acoustic  
17  
18 98 surveillance programs.

19  
20  
21 99 4. Recorded coughs will be annotated with clinical diagnoses (when available) and will  
22  
23 100 contribute to the training of cough-based disease-specific screening and diagnostic tools.

24  
25 101 5. Success of this study is contingent on large-scale enrolment and high participant  
26  
27 102 retention since a small sample size might not be sufficient to appropriately correlate the study  
28  
29 103 population's cough trends and their relationship with the incidence of respiratory diseases at  
30  
31 104 population level.  
32  
33  
34  
35  
36  
37  
38  
39  
40  
41  
42  
43  
44  
45  
46  
47  
48  
49  
50  
51  
52  
53  
54  
55  
56  
57  
58  
59  
60



## 105 **Introduction**

106 Real-time tracking of the COVID-19 pandemic and detection of the emergence of novel  
107 variants or other respiratory pathogens represent challenges for public health authorities  
108 globally. Nonetheless, understanding local epidemiology is essential to disease control efforts.

109 This is particularly true now that the world has moved into a COVID-19 endemic phase, with  
110 periodic outbreaks in multiple locations superimposed over ongoing community transmission.

111 The ability to appropriately monitor disease incidence, however, is frequently limited by a lack  
112 of testing capacity, delays in health-seeking behaviours, as well as complexities related to  
113 timely aggregation of actionable surveillance data by public health authorities.

114 Although asymptomatic cases of COVID-19 and other respiratory communicable diseases are  
115 well described, cough remains a hallmark symptom of COVID-19 with as much as 75% of  
116 infected patients reporting cough as an early symptom. (1, 2) Additionally, coughing increases  
117 person to person transmission. Automatically detecting cough sounds is now possible thanks  
118 to the recent development of acoustics and artificial intelligence (AI) models which can be  
119 deployed on smartphone applications.(3) In brief, putative cough sounds (manifested as short  
120 and explosive noises) are recognized and captured by smartphones. Machine learning models  
121 trained on hundreds of thousands of annotated sounds are then used to distinguish cough  
122 from other sounds. Similar approaches were also taken one step further and shown to have  
123 value in COVID-19 specific cough recognition for disease screening and diagnosis. (4, 5)

124 We propose that COVID-19 surveillance and early outbreak recognition can be enhanced by  
125 digitally monitoring cough and detecting changes in its incidence at population level. We  
126 hypothesize such changes precede individual symptoms recognition, healthcare seeking  
127 behaviours, diagnosis and data aggregation within conventional disease surveillance systems.  
128 Indeed, digital cough monitoring data can be aggregated in real time providing constantly  
129 updated information on the emergence and activity of communicable respiratory diseases  
130 within populations. This approach would be of particular value in low- and middle-income

1  
2  
3 131 countries where (a) capturing passive data through health services is insufficient given  
4  
5 132 unequal access to healthcare, and (b) active case detection and contact tracing capacity is  
6  
7 133 limited. (6, 7)  
8  
9

10 134 To our knowledge, digital cough monitoring for early detection of respiratory disease  
11  
12 135 outbreaks has never been performed. Provided the participation of a critical mass of active  
13  
14 136 users is achieved, monitoring of aggregated cough data could provide a simple and  
15  
16 137 inexpensive surrogate indicator for overall respiratory infections incidence, similar to, but  
17  
18 138 more accurate than wastewater monitoring (8). This information could in turn guide public  
19  
20 139 health interventions. If proven successful in the specific case of COVID-19, this study would  
21  
22 140 establish a template for early and disease-agnostic detection of emerging pathogens,  
23  
24 141 therefore contributing to health systems epidemic preparedness.  
25  
26  
27  
28  
29

### 143 **Primary research question**

144 Can digital cough surveillance predict the incidence of respiratory diseases at population-level  
145 in Navarra, Spain?  
146

### 147 **Methods**

#### 148 **Study design**

149 This is a prospective observational study which will take place between November 2020 and  
150 October 2021 (Figure 1). Participants will be recruited in (a) the Cendea de Cizur, a  
151 municipality composed by a cluster of villages south of the city of Pamplona, (b) the  
152 neighbouring town of Zizur Mayor, in the Chartered Community of Navarra (Spain), as well as  
153 (c) in the different campuses of the University of Navarra (Pamplona), which collides with the  
154 municipalities.  
155  
156  
157  
158  
159  
160

1  
2  
3 155 All these communities are located within a 5 km range from each other, and there is a  
4  
5 156 considerable geographical and social overlap between them, as the University of Navarra is  
6  
7 157 the second most important employer in the area.  
8  
9

10 158 The 4,000 people living in the Cendea de Cizur are served by a public health center which  
11  
12 159 receives 45,000 outpatients visits per year. Of these, approximately 12% are associated with  
13  
14 160 respiratory diseases. Furthermore, the Clínica Universidad de Navarra is the main private  
15  
16 161 healthcare provider in the region and offers medical care to a significant proportion of the  
17  
18 162 population, as well as university students and workers. Both centres offer COVID-19 PCR  
19  
20 163 testing. Together, those two healthcare facilities cover most of the population's healthcare  
21  
22 164 needs and have digitalized medical record systems that facilitate the retrieval of medical data  
23  
24 165 concerning the diagnosis of respiratory diseases among participants.  
25  
26

27 166 Recruitment strategies will include direct solicitation, community meetings, videos and  
28  
29 167 advertisements in social media and university communication platforms. Those willing to  
30  
31 168 participate will attend individual sessions with a study coordinator for counselling and training  
32  
33 169 using the Hyfe Cough Tracker™ (Hyfe™) application, and for obtention of informed consent  
34  
35 170 (Supplementary material). Participants will consent to be contacted regularly via email and  
36  
37 171 telephone by the study team and will also fill an enrolment questionnaire (Supplementary  
38  
39 172 material) where demographic and respiratory diseases medical data will be collected.  
40  
41  
42

43 173

44  
45 174 **Primary objective**

46  
47  
48 175 1. To assess the value of digital cough monitoring and acoustic surveillance in predicting  
49  
50 176 COVID-19 and other respiratory diseases incidence at population level.  
51

52 177 **Secondary objective**

53  
54 178 2. To assess barriers and facilitators to participation in an acoustic surveillance program  
55  
56 179 using a smartphone-based digital cough monitoring application.  
57  
58

59 180  
60

1  
2  
3 **181 Eligibility criteria**  
4

5 **182** To be included in the study, participants must (i) be 13 years old or older, (ii) own a  
6  
7 **183** smartphone, (iii) be willing to install and use the Hyfe™ digital cough monitoring application,  
8  
9 **184** (iv) accept and comply with Hyfe™ privacy policy and terms of use, and (v) grant access to  
10  
11 **185** their medical records. To optimize population representativity, participants also need to (vi)  
12  
13 **186** visit the University of Navarra on a regular basis, either as a student, worker, or patient of the  
14  
15 **187** university clinic, or (vii) have a general interest in the study, and (viii) currently reside in  
16  
17 **188** Navarra. These criteria aim at ensuring a large sample size and the availability of needed  
18  
19 **189** medical records while concentrating recruitment in a geographically focused area.  
20  
21  
22

23  
24 **190**

25 **191 Participant retention**  
26

27 **192** To ensure participants' retention and promote continuous cough recording, we will use videos  
28  
29 **193** posted on social media, as well as emailed to participants, text messages and regular push  
30  
31 **194** notifications sent via the Hyfe™ application on participants' smartphones. Participants will  
32  
33 **195** also receive monthly emails with information regarding the current stage of the study and  
34  
35 **196** high-level preliminary results.  
36  
37  
38

39  
40 **197**

41 **198 Digital cough monitoring**  
42

43 **199** The cough detection application used in this study is Hyfe Cough Tracker™ (Hyfe™).  
44  
45 **200** (<https://www.hyfeapp.com/>). Hyfe™ runs in the background of smartphones operating  
46  
47 **201** systems, listens for and records short snippets (<0.5 seconds) of explosive, putative cough  
48  
49 **202** sounds and then classifies them as cough or non-cough, using a convolutional neural network  
50  
51 **203** model. Cough sounds are automatically matched with time and GPS coordinates which can be  
52  
53 **204** jittered to ensure participants' privacy. Hyfe™ is a research tool that has collected over 5  
54  
55 **205** million putative cough sounds, of which over 1,000,000 have been classified as coughs or not  
56  
57 **206** by a human listener in order to train the AI model.  
58  
59  
60

1  
2  
3 207 The analytical performance of Hyfe™ for cough detection was confirmed using this study's  
4  
5 208 preliminary results from a subgroup of participants recruited in the Cendea de Cizur between  
6  
7 209 November and December 2020. Analytical performance refers to whether the application is  
8  
9 210 sensitive and specific for the classification of recorded sounds as coughs or non-coughs.  
10  
11 211 During this period, nearly 700,000 putative cough sounds were registered, of which 119,876  
12  
13 212 were classified by human observers, revealing a sensitivity of 96.34% and a specificity of  
14  
15 213 96.54%, when using a cough-positivity threshold of 0.85 (Figure 2).  
16  
17  
18  
19

20 214

21 215 Upon enrolment, a study coordinator will assist participants in installing the Hyfe™  
22  
23 216 application. Once turned on, it will continuously monitor participants' cough. Participants can  
24  
25 217 turn the application on and off at will but will be instructed to keep it active for at least six  
26  
27 218 hours or while they sleep, every day for a minimum period of 30 days. In an adaptive design  
28  
29 219 aimed at improving retention, participants will have the possibility of extending their  
30  
31 220 participation to a 3-month and 6-month period.  
32  
33  
34

35 221

## 36 222 **Local epidemiology of respiratory disease**

37  
38 223 Digital medical data systems at the Zizur's health center and the Clínica Universidad de  
39  
40 224 Navarra will be reviewed monthly to establish the incidence of the following respiratory, or  
41  
42 225 cough-associated diseases in the participants cohort; COVID-19, influenza, respiratory  
43  
44 226 syncytial virus (RSV), pneumonia, asthma, bronchitis, pharyngitis, chronic cough, chronic  
45  
46 227 obstructive pulmonary disease (COPD), gastro-esophageal reflux disease (GERD), other  
47  
48 228 nonspecific respiratory tract infections. Specifically, for COVID-19, daily incidence figures for  
49  
50 229 the study area (Cendea de Cizur, Zizur Mayor, and Pamplona), and regional population, will  
51  
52 230 also be obtained from local health authorities. Data will be aggregated and used to build local  
53  
54 231 epidemic curves of respiratory diseases during the study period.  
55  
56  
57  
58  
59

60 232

1  
2  
3 **233 Barriers and facilitators to participation**  
4

5 234 A participation cascade informing on the number of solicited, enrolled, and actively recording  
6  
7 235 participants will be tracked in real time throughout the study. The total number of user-hours  
8  
9 236 using Hyfe™ will also be monitored in real time.

10  
11  
12 237 All participants will be asked to fill a satisfaction survey in which they will be asked about the  
13  
14 238 usability of the app, the problems that they ran into, and their likelihood of using the app in  
15  
16 239 the future. We will follow-up with a group of 25 participants who are willing to attend a focus  
17  
18 240 group discussion (FGD) to better understand the barriers and facilitators affecting  
19  
20 241 participation in the cough-surveillance system. The 25 participants will include some of whom  
21  
22 242 deleted the application early on, who stopped using it after a month, and who had low  
23  
24 243 satisfaction scores.  
25  
26  
27

28 244

29  
30 **245 Patient and public involvement**  
31

32 246 This study pilots an experimental syndromic surveillance approach at population level. The  
33  
34 247 municipal authorities of the Cendea de Cizur were informed about the nature of the study and  
35  
36 248 provided feedback on the best approach to recruit local participants. Similarly,  
37  
38 249 representatives of the University of Navarra's medical services collaborated on the design of  
39  
40 250 the study protocol including the review of recruitment strategies as well as data collection,  
41  
42 251 aggregation and reporting plans. No anticipated participants were involved in the study  
43  
44 252 design. Study findings are to be reported in both English and Spanish to participants and key  
45  
46 253 stakeholders at individual, municipality, and university levels during the surveillance phase.  
47  
48  
49

50 254

51  
52 **255 Data analysis and sample size calculations**  
53

54 **256 Syndromic surveillance as a surrogate marker of respiratory disease activity**  
55

56  
57 257 Given the uncertainty around the incidence of the various respiratory diseases including  
58  
59 258 COVID-19, throughout the study period, it is impossible to establish a target sample size  
60

1  
2  
3 259 sufficient to either confirm or confute with statistical significance that cough monitoring at  
4  
5 260 population level can predict incidence of respiratory diseases. We will endeavour to recruit  
6  
7 261 the highest number of participants possible in order to achieve the best representation of the  
8  
9 262 population.

10  
11  
12 263 First, cough data will be aggregated in time and space to create cough incidence curves and  
13  
14 264 geospatial heat maps reflecting the frequency and density of cough among the studied  
15  
16 265 population (Figure 3 and Figure 4). Second, epidemic curves reflecting the incidence of  
17  
18 266 targeted respiratory illnesses within the participants cohort, and the number of COVID-19  
19  
20 267 cases diagnosed in the study area and population will be generated with data collected from  
21  
22 268 the Clínica Universidad de Navarra, and Zizur's health center, as well as aggregated  
23  
24 269 epidemiological records obtained from regional health authorities, respectively. Coughs per  
25  
26 270 person-hour and clinical diagnoses data will be superposed in time. Finally, we will carry out  
27  
28 271 an autoregressive moving average (ARIMA) analysis to compare the incidence of confirmed  
29  
30 272 and forecasted respiratory diseases (including COVID-19) with the frequency of cough among  
31  
32 273 study participants, measured as coughs per person-hour. ARIMA analysis is a type of time  
33  
34 274 series analysis that uses past data to forecast the likely future behaviour of a variable. In brief,  
35  
36 275 the variable of interest is regressed to its own lagged values, and autoregression and partial  
37  
38 276 autocorrelation functions are used to model the stochastic nature of a time series. (9)  
39  
40 277 Comparison and prediction analyses will be performed using epidemic curves from both the  
41  
42 278 participants cohort and in the entire study area and population.

43  
44  
45  
46  
47  
48 279

### 280 **Perceptions and willingness to participate in syndromic surveillance**

281 Mixed methods will be used to assess individual barriers and facilitators to participation in an  
282 acoustic surveillance program. Among all eligible individuals in the Cendea de Cizur, Zizur  
283 Mayor and in the University of Navarra who are invited to participate in the study, we will  
284 assess how many do install the cough detection application and keep using it through the

1  
2  
3 285 course of the study. Participants corresponding to specific user profiles based on duration and  
4  
5 286 regularity of cough recording will be identified. We will then descriptively analyze the socio-  
6  
7 287 demographic characteristics, and baseline health conditions of participants belonging to the  
8  
9 288 different user profiles.

11  
12  
13 289 A subsample of participants will be contacted once a month, by telephone or text messaging,  
14  
15 290 to obtain feedback from their experience using the app.

17  
18 291 To assess population uptake of Hyfe™, as well as barriers and facilitators to participation, a  
19  
20 292 convenience subsample of 25 participants will be recruited for focus group discussions.

21  
22 293 Following similar designs, FGDs will consist of two parts. (10) The first one will be aimed at  
23  
24 294 understanding a participant's awareness of their cough frequency and temporality patterns,

25  
26 295 as well as the perceived importance of measuring these elements. Questions asked in this part  
27  
28 296 will include (i) How much attention do you pay to your coughs on a daily basis? (ii) How

29  
30 297 important is it for you to know the number of times you cough per day? (iii) Will keeping track  
31  
32 298 of your coughs help you improve your health? The second one will focus on the participant's

33  
34 299 experience using Hyfe™, as well as possible recommendations for developers to improve it.  
35  
36 300 This part will include the following general questions: (i) What do you like about the app, (ii)

37  
38 301 What do you think of this app compared to other health apps, (iii) What doesn't work well,  
39  
40 302 (iv) What keeps you committed (or not) to using the app, (v) What do you think the purpose

41  
42 303 of the app is, (vi) What advice do you have for the developers?  
43  
44  
45  
46  
47  
48  
49 304

### 50 51 305 **Risks and privacy**

52  
53 306 Recording sounds implies specific ethical and privacy concerns. These are, however,  
54  
55 307 addressable at different levels. First, sound snippets recorded are too short (<0.5 seconds) to

56  
57 308 capture conversations or background sound. Participants can withdraw from the study at any  
58  
59 309 time, and the application can be turned off or removed from smartphones freely. Our consent



1  
2  
3 310 process explicitly describes exactly what is and what is not recorded. The use of pre-generated  
4  
5 311 unique identifiers to install and use the smartphone application ensures that only  
6  
7 312 investigators can link cough data to personal identifiers. Contact information collected from  
8  
9 313 participants will be kept in physical forms stored under lock, and password-protected files at  
10  
11 314 the University of Navarra. Only the principal investigator, study coordinator, and research  
12  
13 315 assistant will have access to this information.  
14  
15  
16

316

### 317 **Ethics and dissemination**

20  
21 318 This study protocol was approved by the ethics committee of the Centre Hospitalier de  
22  
23 319 l'Université de Montréal, Canada (Reference numbers 2021-9247 20.253 & 2021-9270 20.226)  
24  
25 320 and the Medical Research Ethics Committee of Navarra, Spain (Reference number  
26  
27 321 PI107/2020). Any modifications to the approved protocol would be resubmitted to both  
28  
29 322 committees.  
30  
31

32 323 Preliminary summary results of this study will be regularly shared with participants via email  
33  
34 324 and through focal meetings. Final results will also be disseminated in open-access scientific  
35  
36 325 journals and international conferences. A two-page summary of results will be prepared in  
37  
38 326 Spanish and posted on the municipal and university website, and shared with local civil and  
39  
40 327 health authorities, as well as with individual participants.  
41  
42

328

### 329 **Discussion**

46  
47 330 The current COVID-19 pandemic highlights the incapacity of existing surveillance networks to  
48  
49 331 rapidly curb the impact of emerging respiratory pathogens in the current globalized world.  
50  
51 332 (11) This is particularly true in low- and middle-income countries, where diagnostic and  
52  
53 333 contact-tracing efforts are limited by their crippling costs, and where epidemiological data  
54  
55 334 aggregation infrequently translates into actionable information because of delays inherent to  
56  
57 335 disaggregated and poorly digitalized health information systems. Continuous, individual-  
58  
59  
60

1  
2  
3 336 based, and passive monitoring of cough among entire populations could represent  
4  
5 337 inexpensive large-scale surveillance networks contributing to the early detection of outbreaks  
6  
7 338 and enabling prioritized and focal delivery of limited resources.  
8  
9

10 339  
11  
12 340 AI and more specifically machine learning models, are increasingly used in disease surveillance  
13  
14 341 and can maximize the impact of limited available resources. (12) Integration of such models  
15  
16 342 with accurate digital epidemiological data was shown to provide reliable, near-real time  
17  
18 343 estimations of influenza disease incidence. (13) The widespread distribution of smartphones  
19  
20 344 coupled with the development of AI-enabled sound classification models now represent  
21  
22 345 another new potential breakthrough in public health and epidemic preparedness. Beyond  
23  
24 346 being able to detect cough, most smartphones have integrated geo-location functions. This  
25  
26 347 allows the integration of acoustic records with geo-spatial and temporal data and increases  
27  
28 348 the range of applications of acoustic surveillance systems for disease control. (14)  
29  
30

31 349  
32  
33 350 Apart from participating in a collective disease tracking and eradication effort, participants  
34  
35 351 monitoring their cough also benefit from objective feedback on their own symptomatology.  
36  
37 352 During a pandemic, such feedback could trigger appropriate healthcare seeking behaviours  
38  
39 353 and self-quarantine further helping to limit disease transmission at community level.  
40  
41

42 354  
43  
44 355 Implementing such an innovative approach to disease surveillance is contingent on  
45  
46 356 overcoming substantial challenges. Evidence suggests that users are typically willing to install  
47  
48 357 mobile apps with a clearly perceived health benefit. But this is often limited by issues such as  
49  
50 358 increased battery drainage, or disruption of daily activities by alerts and notifications. (15)  
51  
52 359 Specifically, for acoustic surveillance apps, protecting user's privacy must also be a priority, in  
53  
54 360 order to create the social trust needed to achieve a high uptake of these systems. To  
55  
56 361 guarantee this, users must be able to clearly understand the nature of these applications, as  
57  
58  
59  
60

1  
2  
3 362 well as to control their functioning at will. This means that the quality of the data recorded  
4  
5 363 will greatly depend on individual behaviours.  
6

7  
8 364

9  
10 365 Despite proven technical capacity and tremendous potential in complementing surveillance  
11  
12 366 systems, whether listed challenges can be overcome and whether digital cough monitoring  
13  
14 367 can provide actionable public health information remains unknown. This study will address  
15  
16 368 those questions. It will also generate operational expertise and qualitative knowledge on the  
17  
18 369 facilitators to be exploited, and the barriers to be addressed in order to maximize uptake and  
19  
20 370 impact prior to implementation on a wider scale.  
21  
22

23 371

## 24 25 26 372 **Limitations and potential challenges**

27  
28  
29 373 Enrolment and retention are expected to represent the major limitations of this project.  
30  
31 374 Acoustic syndromic surveillance tools might be perceived as threatening for the privacy of  
32  
33 375 potential participants. Furthermore, the quantity of cough data recorded will heavily rely on  
34  
35 376 the regular use of the system by participants. The diversity of respiratory and non-respiratory  
36  
37 377 conditions that can cause cough, as well as the consumption of medications to treat them,  
38  
39 378 can make it difficult to link changes in cough frequency with epidemiological data. Finally,  
40  
41 379 asymptomatic, or mild infections of SARS-CoV-2 and other respiratory pathogens, mean that  
42  
43 380 a proportion of infected patients will not contribute to the cough-based surveillance system  
44  
45 381 and are unlikely to seek medical attention, reducing available cough and epidemiological data  
46  
47 382 necessary for the analysis. Those limitations and challenges reflect well the impediments to  
48  
49 383 larger scale deployment of cough-based syndromic surveillance for any respiratory disease  
50  
51 384 hence making this innovative study an ideal stress-test for such approach.  
52  
53  
54  
55  
56  
57  
58  
59  
60

1  
2  
3 385 **Acknowledgements**  
4

5 386 The authors want to thank the Municipality of the Cendea de Cizur, the University of Navarra  
6  
7 387 and all participants for their trust and desire to participate in citizen science and altruistic  
8  
9 388 population-level syndromic surveillance.  
10

11  
12 389

13  
14 390 **Contributors**  
15

16 391 All authors meet criteria for authorship as per the BMJ Global Health policy and ICJME  
17  
18 392 recommendations. Conceptualization (JCGF, JB, DD, NU, LYT, SGL, CCh), data curation (JCGF,  
19  
20 393 JB, NU, CCh), formal analysis (JCGF, JB, NU, SGL, CCh), funding acquisition (SGL),  
21  
22 394 investigation (JCGF, JCh, ALP, VO, IB, JBart, CCh), methodology (JCGF, JB, NU, SGL, CCh),  
23  
24 395 supervision (JCGF, SGL, CCh), writing of the original draft (JCGF, CCh, SGL). All authors have  
25  
26 396 read, reviewed, discussed, and approved the final manuscript and their respective  
27  
28 397 representation in the authorship.  
29  
30  
31

32  
33 398 **Data sharing statement**  
34

35  
36 399 Aggregated deidentified datasets will be available upon completion of the study by  
37  
38 400 reasonable request to the corresponding author.  
39  
40

41  
42 401 **Funding**  
43

44 402 This study was funded by the *Patrick J. McGovern Foundation* (grant name: “Early diagnosis of  
45  
46 403 COVID-19 by utilizing Artificial Intelligence and Acoustic Monitoring”). The funders had no role  
47  
48 404 in study design, data collection and interpretation, or the decision to submit the work for  
49  
50 405 publication. CCh received salary support from *Unitaid* (grant name: BOHEMIA). ISGlobal  
51  
52 406 acknowledges support from the Spanish Ministry of Science and Innovation through the  
53  
54 407 “Centro de Excelencia Severo Ochoa 2019-2023” Program (grant number: CEX2018-000806-  
55  
56 408 S), and support from the Generalitat de Catalunya through the CERCA program.  
57  
58  
59

60 409

1  
2  
3 410 **Competing interest**

4  
5 411 JB is the CEO of Hyfe™ Inc. Hyfe Inc had no role in the decision to submit this protocol for  
6  
7 412 publication. All other authors declare no competing interests. Upon submission of this  
8  
9 413 protocol for publication, JCG, SGL and CCh had full access to all the data available and assumed  
10  
11  
12 414 responsibility for the decision to submit the manuscript content for publication.  
13

14 415

15  
16 416 **References**

- 17  
18  
19  
20 417 1. Huang C, Wang Y, Li X, Ren L, Zhao J, Hu Y, et al. Clinical features of patients infected  
21 418 with 2019 novel coronavirus in Wuhan, China. *The Lancet*. 2020;395(10223):497-506.
- 22  
23 419 2. Kim GU, Kim MJ, Ra SH, Lee J, Bae S, Jung J, et al. Clinical characteristics of  
24 420 asymptomatic and symptomatic patients with mild COVID-19. *Clin Microbiol Infect*.  
25 421 2020;26(7):948.e1-.e3. PubMed PMID: 32360780. Epub 05/01. eng.
- 26  
27 422 3. Rasheed J, Jamil A, Hameed AA, Aftab U, Aftab J, Shah SA, et al. A survey on artificial  
28 423 intelligence approaches in supporting frontline workers and decision makers for the COVID-  
29 424 19 pandemic. *Chaos, Solitons, and Fractals*. 2020;141:110337 -
- 30  
31 425 4. Mouawad P, Dubnov T, Dubnov S. Robust Detection of COVID-19 in Cough Sounds. *SN*  
32 426 *Computer Science*. 2021 2021/01/12;2(1):34.
- 33  
34 427 5. Laguarda J, Suerto F, Subirana B. COVID-19 Artificial Intelligence Diagnosis Using Only  
35 428 Cough Recordings. *Open Journal of Engineering in Medicine and Biology*. 2020;1:275-81.
- 36  
37 429 6. Peeling RW, Wedderburn CJ, Garcia PJ, Boeras D, Fongwen N, Nkengasong J, et al.  
38 430 Serology testing in the COVID-19 pandemic response. *The Lancet Infectious Diseases*. 2020  
39 431 2020/09/01/;20(9):e245-e9.
- 40  
41 432 7. Chowdhury R, Luhar S, Khan N, Choudhury SR, Matin I, Franco OH. Long-term  
42 433 strategies to control COVID-19 in low and middle-income countries: an options overview of  
43 434 community-based, non-pharmacological interventions. *European Journal of Epidemiology*.  
44 435 2020 2020/08/01;35(8):743-8.
- 45  
46 436 8. Farkas K, Hillary LS, Malham SK, McDonald JE, Jones DL. Wastewater and public  
47 437 health: the potential of wastewater surveillance for monitoring COVID-19. *Curr Opin Environ*  
48 438 *Sci Health*. 2020;17:14-20. PubMed PMID: 32835157. Epub 06/12. eng.
- 49  
50 439 9. Ho SL, Xie M. The use of ARIMA models for reliability forecasting and analysis.  
51 440 *Computers & Industrial Engineering*. 1998 1998/10/01/;35(1):213-6.
- 52  
53 441 10. Nouvet E, Knoblauch AM, Passe I, Andriamiadanarivo A, Ravelona M, Ainanomena  
54 442 Ramtariharisoa F, et al. Perceptions of drones, digital adherence monitoring technologies and  
55 443 educational videos for tuberculosis control in remote Madagascar: a mixed-method study  
56 444 protocol. *BMJ Open*. 2019;9(5):e028073.

- 1  
2  
3 445 11. WHO Coronavirus (COVID-19) Dashboard: World Health Organization; 2021 [cited  
4 446 2021 06/03]. Available from: <https://covid19.who.int/>.
- 6 447 12. Naseem M, Akhund R, Arshad H, Ibrahim MT. Exploring the Potential of Artificial  
7 448 Intelligence and Machine Learning to Combat COVID-19 and Existing Opportunities for LMIC:  
8 449 A Scoping Review. *Journal of Primary Care & Community Health*. 2020  
9 450 2020/01/01;11:2150132720963634.
- 11 451 13. Santillana M, Nguyen AT, Louie T, Zink A, Gray J, Sung I, et al. Cloud-based Electronic  
12 452 Health Records for Real-time, Region-specific Influenza Surveillance. *Scientific Reports*. 2016  
13 453 2016/05/11;6(1):25732.
- 15 454 14. Mukundarajan H, Hol FJH, Castillo EA, Newby C, Prakash M. Using mobile phones as  
16 455 acoustic sensors for high-throughput mosquito surveillance. *eLife*. 2017  
17 456 2017/10/31;6:e27854.
- 19 457 15. Liss DT, Serrano E, Wakeman J, Nowicki C, Buchanan DR, Cesan A, et al. "The Doctor  
20 458 Needs to Know": Acceptability of Smartphone Location Tracking for Care Coordination. *JMIR*  
21 459 *mHealth and uHealth*. 2018 May 4;6(5):e112. PubMed PMID: 29728349. Pubmed Central  
22 460 PMCID: PMC5960037. Epub 2018/05/08. eng.

25  
26 461

27  
28 462 **Supplementary materials**

- 29  
30 463 1. Informed Consent Form
- 31  
32 464 2. Assent form
- 33  
34 465 3. Complementary medical questionnaire for participants
- 35  
36 466 4. SPIRIT Checklist

37  
38  
39  
40 467 I, the Submitting Author has the right to grant and does grant on behalf of all authors of the  
41  
42 468 Work (as defined in the below author licence), an exclusive licence and/or a non-exclusive  
43  
44 469 licence for contributions from authors who are: i) UK Crown employees; ii) where BMJ has  
45  
46 470 agreed a CC-BY licence shall apply, and/or iii) in accordance with the terms applicable for US  
47  
48 471 Federal Government officers or employees acting as part of their official duties; on a  
49  
50 472 worldwide, perpetual, irrevocable, royalty-free basis to BMJ Publishing Group Ltd ("BMJ") its  
51  
52 473 licensees and where the relevant Journal is co-owned by BMJ to the co-owners of the  
53  
54 474 Journal, to publish the Work in BMJ Global Health and any other BMJ products and to exploit  
55  
56 475 all rights, as set out in our [licence](#).

57  
58  
59  
60

1  
2  
3 476  
4

5 477 The Submitting Author accepts and understands that any supply made under these terms is  
6  
7 478 made by BMJ to the Submitting Author unless you are acting as an employee on behalf of  
8  
9 479 your employer or a postgraduate student of an affiliated institution which is paying any  
10  
11 480 applicable article publishing charge ("APC") for Open Access articles. Where the Submitting  
12  
13 481 Author wishes to make the Work available on an Open Access basis (and intends to pay the  
14  
15 482 relevant APC), the terms of reuse of such Open Access shall be governed by a Creative  
16  
17 483 Commons licence – details of these licences and which [Creative Commons](#) licence will apply  
18  
19 484 to this Work are set out in our licence referred to above.  
20  
21  
22  
23

24 485 **Figure legends**

25  
26  
27 486 **Figure 1:** Study design, timeline and monitoring plan for the study's primary objective.

28  
29 487 **Figure 2:** Receiver operating characteristic (ROC) analysis showing an area under the curve  
30 488 (AUC) of 0.995 for the classification of cough in participants recruited between November  
31 489 and December 2020.

32  
33 490 **Figure 3:** Coughs per person-hour registered in 62 participants between November 2020 and  
34 491 January 2021.

35  
36 492 **Figure 4:** Heatmap of registered cough episodes in the municipalities of Zizur Mayor, Cendea  
37 493 de Cizur, and Pamplona between November 2020 and March 2021 (The Cendea de Cizur is  
38 494 an incontiguous municipality).  
39  
40  
41  
42  
43  
44  
45  
46  
47  
48  
49  
50  
51  
52  
53  
54  
55  
56  
57  
58  
59  
60

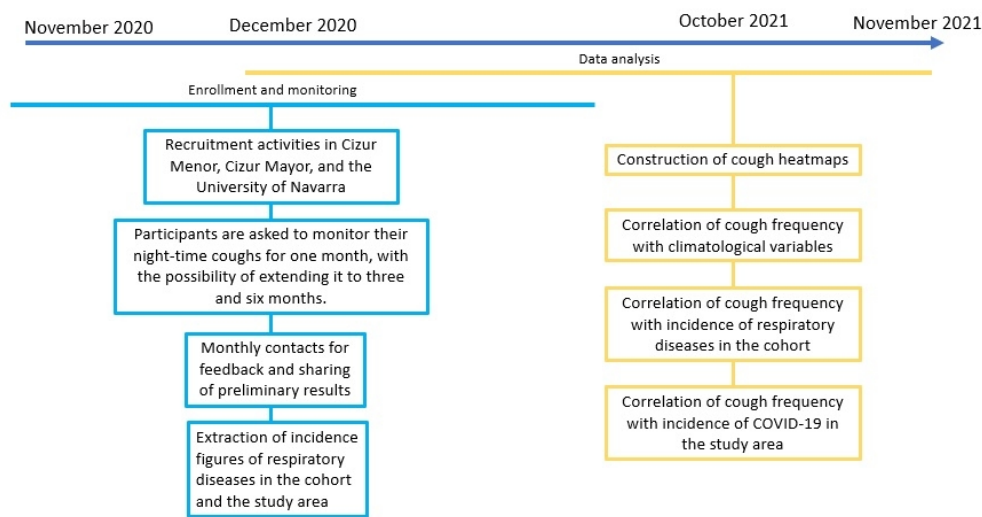

Figure 1

230x128mm (96 x 96 DPI)



1  
2  
3  
4  
5  
6  
7  
8  
9  
10  
11  
12  
13  
14  
15  
16  
17  
18  
19  
20  
21  
22  
23  
24  
25  
26  
27  
28  
29  
30  
31  
32  
33  
34  
35  
36  
37  
38  
39  
40  
41  
42  
43  
44  
45  
46  
47  
48  
49  
50  
51  
52  
53  
54  
55  
56  
57  
58  
59  
60

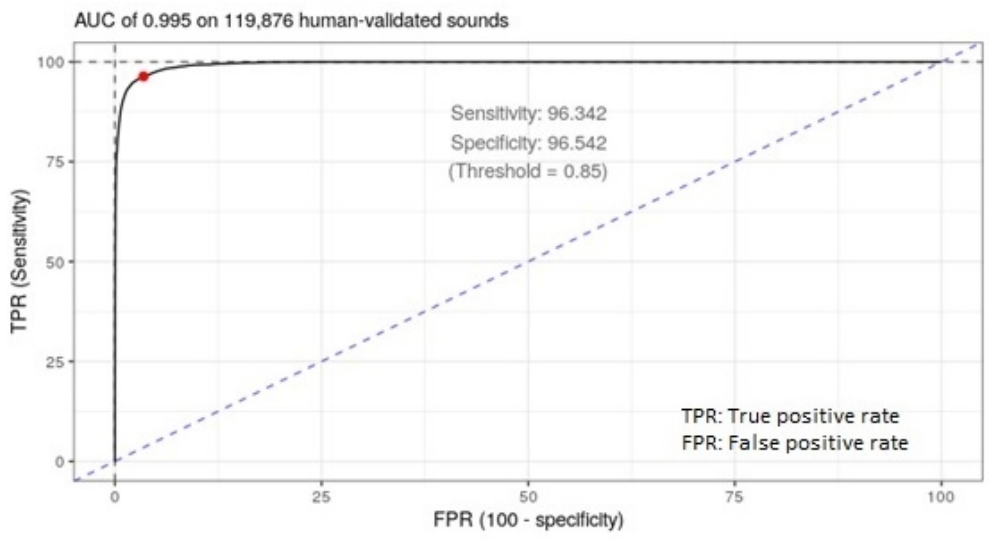

Figure 2  
147x79mm (96 x 96 DPI)

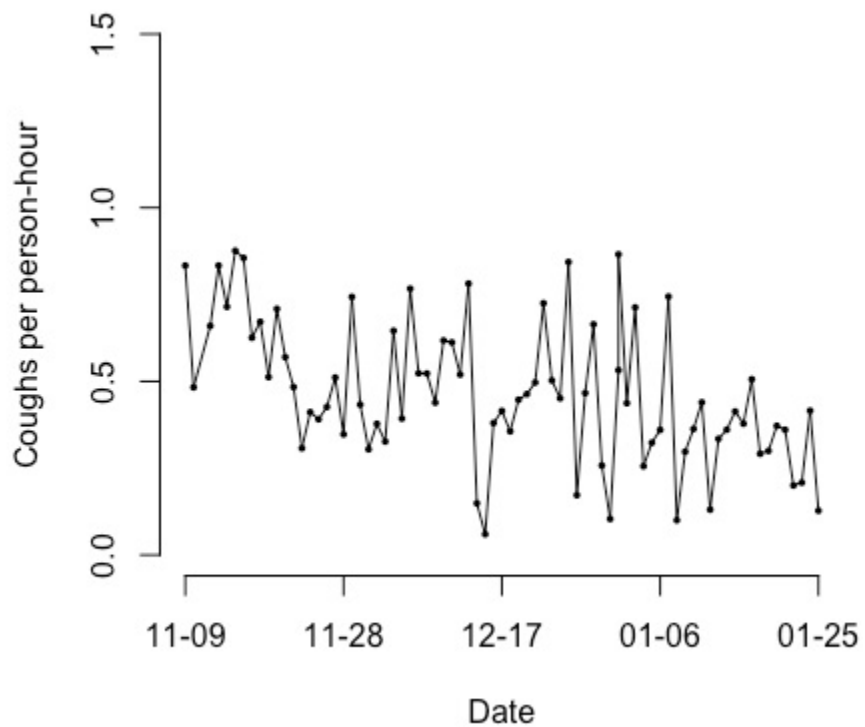

Figure 3

115x99mm (96 x 96 DPI)

1  
2  
3  
4  
5  
6  
7  
8  
9  
10  
11  
12  
13  
14  
15  
16  
17  
18  
19  
20  
21  
22  
23  
24  
25  
26  
27  
28  
29  
30  
31  
32  
33  
34  
35  
36  
37  
38  
39  
40  
41  
42  
43  
44  
45  
46  
47  
48  
49  
50  
51  
52  
53  
54  
55  
56  
57  
58  
59  
60

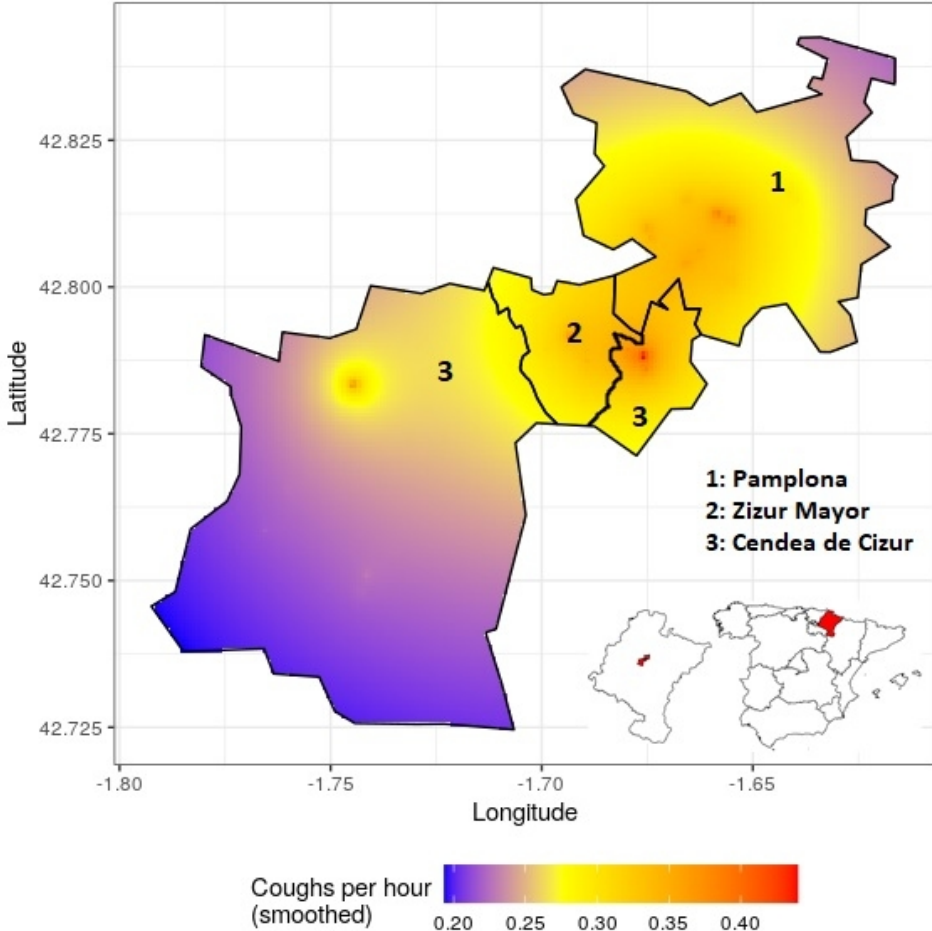

Figure 4

157x151mm (96 x 96 DPI)

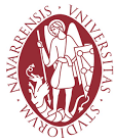

**HOJA DE INFORMACIÓN Y CONSENTIMIENTO**

**Versión 3.0, 6 de enero de 2021**

**TÍTULO DEL ESTUDIO:** Vigilancia acústica y monitorización digital de la tos a nivel poblacional para la detección temprana de brotes de enfermedades respiratorias. Un estudio observacional exploratorio.

**CÓDIGO DEL PROMOTOR:**

**PROMOTOR**

Clínica Universidad de Navarra/Universidad de Navarra, Avenida de Pío XII, 36  
31008 Pamplona.

**FINANCIACIÓN:**

Este estudio está siendo financiado por el Centre Hospitalier de l'Université de Montréal (CHUM) y la fundación Patrick J. McGovern a través de una subvención otorgada al co-investigador Simon Grandjean Lapierre (*Early diagnosis of COVID-19 by utilizing Artificial Intelligence and Acoustic Monitoring*).

**INVESTIGADOR PRINCIPAL**

***Carlos Chaccour***

***Teléfono +34 666 293 112***

***Email cchaccour@unav.es***

**INTRODUCCIÓN**

Nos dirigimos a usted para informarle sobre un estudio de investigación en el que se le invita a participar. El estudio ha sido aprobado por un Comité de Ética de la Investigación de la Universidad de Navarra, el comité de ética de la investigación con medicamentos de Navarra y el comité de ética del Centre Hospitalier de l'Université de Montréal (CHUM), en Canadá.

Con este documento pretendemos que usted reciba la información adecuada para que pueda entender de qué se trata el estudio y decidir si desea o no participar en el mismo. Para ello, lea esta hoja informativa con atención y nosotros le aclararemos las dudas que puedan surgir después de la explicación. Además, puede consultar con las personas que considere oportuno.

**PARTICIPACIÓN VOLUNTARIA**

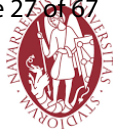

1  
2  
3 Debe saber que su participación en este estudio es voluntaria y que puede  
4 decidir no participar o cambiar su decisión y retirar el consentimiento en cualquier momento, sin que  
5 por ello se altere la relación con su médico ni se produzca perjuicio alguno en su tratamiento.  
6  
7

### 8 **DESCRIPCIÓN GENERAL DEL ESTUDIO**

9  
10 Los coronavirus son un grupo de virus que causan infecciones respiratorias generalmente leves. Sin  
11 embargo, un miembro de este grupo, el SARS-Cov-2, es el responsable de provocar la COVID-19, una  
12 enfermedad potencialmente peligrosa que desde finales del 2019 se ha extendido a lo largo de todo  
13 el mundo.  
14

15 Uno de los elementos necesarios para contener el avance de la pandemia de COVID-19 es entender  
16 su escala real. Esto es particularmente importante ahora que los brotes regulares en zonas en las que  
17 simultáneamente ocurre transmisión a una menor escala se han convertido en una realidad. Uno de  
18 los mayores obstáculos de los sistemas sanitarios es la limitada capacidad de hacer pruebas  
19 diagnósticas, lo que se traduce en retrasos en la búsqueda de atención médica, así como en la  
20 recolección de la información necesaria para planear intervenciones que limiten la expansión de la  
21 enfermedad.  
22

23 La gran mayoría de pacientes con COVID-19 presentan tos como un síntoma temprano de la  
24 enfermedad. Este estudio pretende evaluar la utilidad de una aplicación para el móvil, llamada  
25 HyfeApp, que registra y evalúa patrones de tos, como complemento a las estrategias de vigilancia  
26 epidemiológica existentes. Para esto, estimamos que será necesario grabar y analizar episodios  
27 individuales de tos.  
28

29 Por eso esperamos que el mayor número posible de habitantes instale la aplicación. Esta aplicación  
30 se ejecuta en segundo plano en el móvil. Aunque HyfeApp tiene acceso continuo al micrófono de su  
31 móvil, ha sido diseñada para procesar únicamente sonidos compatibles con las características de la  
32 tos humana. Cuando uno de estos sonidos es detectado y grabado por la aplicación, un algoritmo de  
33 inteligencia artificial lo estudia y en caso de decidir qué se trata de un episodio de tos, se guarda junto  
34 a la información sobre la ubicación geográfica y el momento en que ocurrió, que es proporcionada  
35 por el sistema GPS del móvil.  
36  
37

38 Aparte de la información suministrada por la aplicación, también revisaremos los registros médicos  
39 de aquellas personas dispuestas a participar que acudan a consulta en el sistema nacional de salud, o  
40 la Clínica Universidad de Navarra. El objetivo de esto es recolectar información sobre la presencia de  
41 tos durante la exploración médica, o el diagnóstico de alguna enfermedad respiratoria en alguna de  
42 las visitas. Solo se consultará información relacionada con alguna de las siguientes condiciones:  
43  
44

- 45 ● Tos no específica.
  - 46 ● Infecciones del tracto respiratorio superior.
  - 47 ● Faringitis.
  - 48 ● Asma.
  - 49 ● Bronquitis.
  - 50 ● Enfermedad Broncopulmonar Obstructiva Crónica (EBPOC).
  - 51 ● COVID-19
- 52  
53  
54  
55  
56  
57  
58  
59  
60

- Enfermedad por Reflujo Gastroesofágico (ERGE)
- Influenza
- Neumonía (por cualquier causa)
- Infección por virus sincitial respiratorio (VSR)
- Infecciones respiratorias inespecíficas.

Otros exámenes paraclínicos a ser recolectados incluyen:

- Microbiología
  - Pruebas de COVID-19
  - PCR para influenza
  - Cultivo de esputo
- Hematología
  - Hematología completa
  - Prueba del dímero D.
- Bioquímica
  - Proteína C reactiva
  - Procalcitonina
  - CPK
  - LDH
  - Ferritina

Aparte de la información obtenida de la app y sus registros médicos, también le pediremos a un grupo reducido de participantes que formen parte de discusiones grupales focalizadas, para explorar los desafíos que representa el uso continuo de HyfeApp, y su participación en el estudio. En caso de que se le solicite participar, usted podrá aceptar o negarse.

### **Duración**

Se recolectará información inicialmente por un período de 1 mes, consultándosele en ese momento su disposición a seguir participando por 3 y 6 meses. Usted podrá negarse a seguir participando en el estudio en cualquier momento.

### **Procedimientos del estudio**

Usted no puede participar en el ensayo si:

- No puede o no quiere aceptar compartir su información codificada, relacionada a sus registros de tos con bases de datos usadas para refinar los diagnósticos basados en perfiles acústicos.
- Si tiene menos de 13 años de edad.
- Si no tiene un teléfono inteligente capaz de ejecutar HyfeApp.
- Si no es un estudiante/trabajador de la Universidad de Navarra, o un paciente diagnosticado con una enfermedad causante de tos en la Clínica Universidad de Navarra.

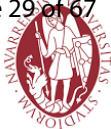

- Si no es residente en Navarra.

Si usted decide participar, un miembro de nuestro equipo lo ayudará a instalar la aplicación en su móvil. No serán necesarias nuevas visitas de parte del equipo de investigación, pero serán contactados una vez al mes para obtener comentarios sobre su experiencia usando la aplicación y ratificar su consentimiento y disposición a seguir participando en el estudio. También podrá ser contactado vía correo electrónico para recibir actualizaciones periódicas sobre el estado del proyecto y sus resultados preliminares.

### **LA APLICACIÓN HYFEAPP**

HyfeApp es una aplicación móvil disponible para los sistemas operativos Android y iOS (Apple), desarrollada por un equipo multidisciplinario que incluye analistas de datos, desarrolladores de software y médicos especialistas en enfermedades infecciosas.

#### **¿Qué hace HyfeApp?**

HyfeApp se ejecuta constantemente en el segundo plano de su móvil, sin interferir con el funcionamiento de otras aplicaciones, pero teniendo acceso a su micrófono y grabando recortes de sonidos explosivos de menos de 0.5 segundos de duración. Ni las conversaciones, ni los sonidos de fondo son grabados. Estos recortes son enviados a un servidor, donde un algoritmo de inteligencia artificial identifica aquellos que presentan cambios súbitos y cortos en los decibeles, compatibles con episodios de tos. Posteriormente, otro algoritmo los procesa, evaluando otras características y determinando si efectivamente se trató de un episodio de tos. El servidor envía esta información de vuelta al móvil, de forma que los archivos clasificados como tos se incorporan a los registros mostrados por la aplicación.

HyfeApp es una herramienta que le proporciona información sobre su estado de bienestar. Tal como herramientas similares que cuentan calorías, registran el número de pasos o ronquidos. La única diferencia es que HyfeApp cuenta episodios de tos.

#### **Beneficios y riesgos por su participación en estudio**

HyfeApp le permitirá llevar un registro del número de veces que tose al día, así como evidenciar cambios con respecto a días anteriores. Sin embargo, no es una herramienta de diagnóstico o tratamiento médico. Por lo tanto, ni provee información o consejos médicos, ni sustituye de ninguna forma a los servicios sanitarios: HyfeApp no es un instrumento médico especializado. Si usted tiene alguna duda sobre su estado de salud, debe consultarlas con un médico o en caso de emergencia, llamar a los servicios respectivos inmediatamente .

Grabar sonidos desde un móvil inmediatamente genera dudas sobre la forma en que será manejada la información, y garantizada la privacidad de los participantes. Como hemos explicado anteriormente, HyfeApp no graba conversaciones ni sonidos de ambiente. Los segmentos de 0.5 segundos grabados por la aplicación no permiten identificar a los participantes. Sin embargo, algunos de estos sonidos pudiesen permitir identificar al participante si son interpretados en conjunto a otra metadata registrada por la aplicación (como el número de teléfono, por ejemplo). Por esta razón, toda la

1  
2  
3 información transmitida por la aplicación estará encriptada y manejada según  
4 los protocolos de seguridad estándar empleados en este tipo de estudios. De esta forma, únicamente  
5 los investigadores podrán asociar los datos recolectados por la aplicación, a otros elementos que  
6 permitan identificar a los participantes.  
7

8 No será remunerado por su participación en este estudio.  
9

## 10 11 **CONFIDENCIALIDAD**

12  
13  
14  
15 Toda la información recolectada en este estudio se mantendrá codificada, de forma que no pueda ser  
16 vinculada a sus datos personales. Solo el investigador principal y los co-investigadores sabrán su  
17 nombre y en cualquier documento o comunicación se usará un número de identificación personal  
18 asignado a cada participante. Los ordenadores utilizados para analizar los datos de este estudio  
19 tendrán contraseñas y solo investigadores autorizados podrán acceder a ellas.  
20  
21  
22

23 La Universidad de Navarra, como responsable del tratamiento de datos, se compromete al  
24 cumplimiento de la Ley Orgánica del 3/2018, de 5 de diciembre y demás normativa de protección de  
25 datos en vigor. Por ello, es importante que conozca la siguiente información:

- 27 • Además de los derechos que ya conoce (acceso, modificación, oposición y cancelación de datos)  
28 ahora también puede limitar el tratamiento de datos que sean incorrectos, solicitar una copia o que  
29 se trasladen a un tercero (portabilidad) los datos que usted ha facilitado para el estudio. Para ejercer  
30 sus derechos, diríjase al Delegado de Protección de Datos de la institución en  
31 [\[protecciondedatosnav@unav.es\]](mailto:protecciondedatosnav@unav.es). Así mismo tiene derecho a dirigirse a la Agencia de Protección de  
32 Datos si no quedara satisfecho/a.  
33  
34
- 35 • Tanto el Centro como el Promotor son responsables respectivamente del tratamiento de sus datos  
36 y se comprometen a cumplir con la normativa de protección de datos en vigor. Los datos recogidos  
37 para el estudio estarán identificados mediante un código, de manera que no se incluya información  
38 que pueda identificarle, y sólo su médico del estudio/colaboradores podrá relacionar dichos datos con  
39 usted y con su historia clínica. Por lo tanto, su identidad no será revelada a ninguna otra persona salvo  
40 a las autoridades sanitarias, cuando así lo requieran o en casos de urgencia médica. Los Comités de  
41 Ética de la Investigación, los representantes de la Autoridad Sanitaria en materia de inspección y el  
42 personal autorizado por el Promotor, únicamente podrán acceder para comprobar los datos  
43 personales, los procedimientos del estudio clínico y el cumplimiento de las normas de buena práctica  
44 clínica (siempre manteniendo la confidencialidad de la información).  
45  
46
- 47 • El Investigador y el Promotor están obligados a conservar los datos recogidos para el estudio al  
48 menos hasta 25 años tras su finalización. Posteriormente, su información personal solo se conservará  
49 por el centro para el cuidado de su salud y por el promotor para otros fines de investigación científica  
50 si usted hubiera otorgado su consentimiento para ello, y si así lo permite la ley y requisitos éticos  
51 aplicables.  
52  
53
- 54 • Si realizáramos transferencia de sus datos codificados fuera de la UE a las entidades de nuestro  
55 grupo, a prestadores de servicios o a investigadores científicos que colaboren con nosotros, los datos  
56 del participante quedarán protegidos con salvaguardas tales como contratos u otros mecanismos por  
57 las autoridades de protección de datos. Si el participante quiere saber más al respecto, puede  
58 contactar al Delegado de Protección de Datos del promotor [\[protecciondedatosnav@unav.es\]](mailto:protecciondedatosnav@unav.es).  
59  
60



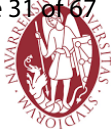

### COMPENSACIÓN ECONÓMICA

El promotor del estudio es el responsable de gestionar la financiación del mismo. Para la realización del estudio, el promotor ha firmado un contrato con el centro donde se va a realizar y con el médico del estudio.

Su participación en este estudio no le causará costes adicionales diferentes de los asociados a su tratamiento habitual. La asistencia rutinaria deberá ser pagada por la seguridad social, por su seguro médico o por usted mismo.

Usted no recibirá ninguna compensación económica por su participación en este estudio.

### OTRA INFORMACIÓN RELEVANTE

Cualquier nueva información referente a la aplicación utilizada en el estudio y que pueda afectar su disposición para participar en el mismo, que se descubra durante su participación, le será comunicada lo antes posible.

Si usted decide retirar el consentimiento para participar en este estudio, no se añadirán nuevos datos a la base de datos y puede exigir la destrucción de cualquier información identificable previamente retenidas para evitar la realización de nuevos análisis.

También debe saber que puede ser excluido del estudio si el promotor y/o los investigadores del estudio lo consideran oportuno, ya sea por motivos de seguridad, por cualquier acontecimiento adverso derivado de su participación, o porque consideren que no está cumpliendo con los procedimientos establecidos. En cualquiera de los casos, usted recibirá una explicación adecuada del motivo que ha ocasionado su retirada del estudio

### COMPARTIENDO LOS RESULTADOS

Usted tendrá acceso a todo el conocimiento generado por esta investigación en todo momento, solo debe preguntar al investigador principal. No compartiremos su nombre, estado de salud o dirección. Eventualmente, los resultados serán publicados, de forma tal que cualquier persona interesada en conocerlos, pueda acceder a ellos. Usted podrá solicitar información sobre el estado y los resultados del estudio, preguntándole directamente al investigador principal.

Al firmar el formulario de consentimiento adjunto, se compromete a cumplir con los procedimientos del estudio que se le han expuesto.

### DERECHO A NEGARSE A PARTICIPAR O ABANDONAR EL ESTUDIO

- No tiene que participar en este estudio si no desea hacerlo.
- Tiene el derecho a NO firmar este formulario. Si no desea firmar este formulario, no podrá participar en este estudio de investigación. Esto se debe a que necesitamos su permiso por escrito antes de poder usar su información.
- Tiene el derecho a abandonar este estudio incluso después de haber aceptado participar. Si decide abandonar el estudio, no usaremos su información. En caso de decidir

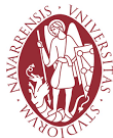

abandonar el estudio, por favor comuníquese con un miembro de nuestro personal. No tiene que explicar sus razones para abandonar el estudio.

**A QUIÉN CONTACTAR**

Si no está satisfecho con la forma en que se llevó a cabo este estudio, o tiene alguna duda, queja o pregunta sobre sus derechos como participante, por favor contacte a la oficina de atención al paciente de la Clínica Universidad de Navarra, por teléfono (+34 948 255 400) o correo electrónico ([atpacientun@unav.es](mailto:atpacientun@unav.es)), para hablar con alguien independiente del equipo investigador.

Si tiene alguna duda sobre este estudio o sus procedimientos, ahora o en el futuro, puede comunicarse con: \_\_\_\_\_. Teléfono: \_\_\_\_\_. Quién es el investigador principal del estudio. Puede llamar de lunes a viernes entre las 8:00 y las 17:00 horas.

Al firmar el formulario de consentimiento adjunto, se compromete a cumplir con los procedimientos del estudio que se le han expuesto.

**Consentimiento Informado por escrito**

**TÍTULO DEL ESTUDIO:** Vigilancia acústica y monitorización digital de la tos a nivel poblacional para la detección temprana de brotes de enfermedades respiratorias. Un estudio observacional exploratorio.

**CÓDIGO DEL PROMOTOR:**

Versión y fecha:

Yo, (nombre y apellidos)

.....

He leído la hoja de información que se me ha entregado.

He podido hacer preguntas sobre el estudio.

He recibido suficiente información sobre el estudio.

He hablado con:

.....

(nombre y dos apellidos del investigador)

Comprendo que mi participación es voluntaria.

Comprendo que puedo retirarme del estudio:

1º Cuando quiera

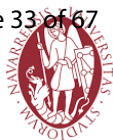

1  
2  
3  
4  
5  
6  
7  
8  
9  
10  
11  
12  
13  
14  
15  
16  
17  
18  
19  
20  
21  
22  
23  
24  
25  
26  
27  
28  
29  
30  
31  
32  
33  
34  
35  
36  
37  
38  
39  
40  
41  
42  
43  
44  
45  
46  
47  
48  
49  
50  
51  
52  
53  
54  
55  
56  
57  
58  
59  
60

2º Sin tener que dar explicaciones.

3º Sin que esto repercuta en mis cuidados médicos.

Presto libremente mi conformidad para participar en el estudio y doy mi consentimiento para el acceso y utilización de mis datos en las condiciones detalladas en la hoja de información

**Firma del investigador:**

**Nombre:**

**Fecha:**

**Firma del investigador:**

**Nombre:**

**Fecha:**

**Firma del participante:**

**Nombre:**

**Fecha:**

**Firma del Representante legal o Testigo imparcial (táchese lo que no proceda):**

**DNI:**

**Fecha:**

**A causa de:**

Este documento se firmará por duplicado quedándose una copia el investigador y otra el participante.



**INFORMATION AND CONSENT SHEET**

**Version 3.0 (January 6<sup>th</sup>, 2021)**

**Study Title:** Acoustic surveillance and digital cough monitoring at population level for early respiratory disease outbreak detection, an exploratory observational study

**Promoter Code:**

**Promoter**

Clínica Universidad de Navarra/Universidad de Navarra, Avenida de Pío XII, 36  
31008 Pamplona

**Funder:** This study is funded by the Centre Hospitalier de l'Université de Montréal (CHUM) and the Patrick J. McGovern Foundation through a grant awarded to Co-Investigator Simon Grandjean Lapierre (*Early diagnosis of COVID-19 by utilizing Artificial Intelligence and Acoustic Monitoring*)

**Main Researcher:**

*Carlos Chaccour*  
*Teléfono +34 666 293 112*  
*Email cchaccour@unav.es*

**Introduction**

The objective of this document is to inform you about the characteristics of a research study you have been invited to participate in. The study has been approved by the Committee of Research Ethics of the Universidad de Navarra and the Committee of Medication Ethics of Navarra (Spain), as well as the ethics committee from the Centre Hospitalier de l'Université de Montréal (CHUM), in Canada.

This document aims to provide you with proper information, so you can understand this study and decide by yourself if you are willing to take part or not in it. Please read this information document carefully and we will answer any questions that might come up afterwards. You can also discuss this with people you trust before making a decision.

**Voluntary Participation**

You must know that your participation in this study is voluntary and you can decide not to take part, or change your mind and withdraw your consent at any time in the future. This will not affect your relationship with your healthcare provider, nor harm your access to proper medical treatment in any way.

**General description of the study**

Coronaviruses are a group of viruses that cause generally mild respiratory disease. However, a member of this group, the SARS-Cov-2, is responsible for causing COVID-19, a potentially dangerous disease that has spread across the globe since 2019.

One of the necessary interventions to contain the COVID-19 pandemic is understanding its real scale. This is particularly important now that new outbreaks are being regularly reported in areas with ongoing low-level transmission. A major limitation in this process is the limited diagnostic capabilities of many countries, which translates into delays in the search of medical attention and collection of necessary epidemiological data.

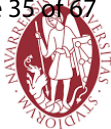

1  
2  
3  
4  
5  
6  
7 Most patients with COVID-19 present cough as an early symptom of disease. This study aims to  
8 evaluate the usefulness of a mobile app called HyfeApp, which registers and studies cough patterns,  
9 as a complement to existing disease surveillance strategies. To do this, we will need to record and  
10 analyse episodes of cough in the town of Cizur Menor which has been selected as the location of the  
11 initial studies of this new platform.  
12

13 For this reason, we need as many people as possible installing the app. This App runs in the  
14 background of your mobile phone. Although HyfeApp has continuous access to the mobile's mic, it  
15 has been designed to exclusively process sounds that match the characteristics of human cough. When  
16 one of these sounds is detected and recorded by the app, an artificial intelligence algorithm studies it  
17 and determines whether it is indeed an episode of cough. If so, the record is stored, along with time  
18 and geographical information provided by the mobile's GPS.  
19

20  
21 Besides the information from the app, we will also review the medical records of those participants  
22 who present for a medical consultation in the national health system or the Clinica Universidad de  
23 Navarra. The objective of this is to collect information about the presence of cough, or any respiratory  
24 disease during one of those visits. Data from your medical chart will be obtained by the investigators  
25 from your local clinic or hospital. This includes without being limited to information related to any of  
26 the following conditions will be reviewed:  
27

- 28 ● Non-specific cough
- 29 ● Non-specific upper respiratory tract infections
- 30 ● Pharyngitis
- 31 ● Asthma
- 32 ● Bronchitis
- 33 ● Chronic Obstructive Pulmonary Disease (COPD)
- 34 ● COVID-19
- 35 ● Gastro-esophageal reflux disease (GERD)
- 36 ● Influenza
- 37 ● Pneumonia (any cause)
- 38 ● Respiratory Syncytial virus
- 39 ● Non-specific respiratory tract infections
- 40
- 41
- 42

43 Additional laboratory test data to be collected from the selected visits includes:

- 44 ● Microbiology
  - 45 ○ COVID-19 tests
  - 46 ○ Flu PCR
  - 47 ○ Sputum culture
- 48 ● Hematology
  - 49 ○ Full blood count
  - 50 ○ D-dimer test
- 51 ● Biochemistry
  - 52 ○ C-reactive protein
  - 53 ○ Procalcitonin
  - 54 ○ CPK
  - 55 ○ LDH
  - 56 ○ Ferritin
- 57 ● Radiology
- 58
- 59
- 60

- Chest X-Ray
- Thorax CT-Scan

Besides the information from the app and medical charts, we will also solicit a restricted number of participants to participate in focus group discussions to explore the challenges related to using HyfeApp and participating in this study. If solicited, it will be your right to accept or refuse to participate in those focus groups.

### **Duration**

Data will be initially collected for a one-month period. You will then be offered the opportunity to continue in the study for 3 and 6 months. You can refuse continuing in the study at any point.

### **Study Procedures**

You will not be able to enroll in this study if you:

- Are incapable or unwilling to accept to share your codified cough data with multicenter databases aiming at refining acoustic-based diagnostics.
- Are under 13 years of age.
- Do not own a smartphone able to run HyfeApp.
- Are not a student/worker at the University of Navarra or a patient diagnosed with cough-related disease at the Clínica Universidad de Navarra.
- Are not a resident in Navarra.

In case you decide to take part, a member of our team will help you install the app on your mobile. No further visits from the research team will be necessary, but you might be contacted once a month to collect feedback on your experience using the app, as well as to confirm your willingness to continue in the study. You might also receive periodic updates via email, to keep you informed on the status of the project and relevant preliminary results.

### **About HyfeApp**

HyfeApp is a mobile app available for Android and IOS (Apple) operating systems, developed by a multidisciplinary team of data scientists, software developers and infectious disease physicians.

### **What does HyfeApp do?**

HyfeApp runs in the background of your mobile, without interfering with any other running app, but having constant access to your mic and recording explosive sound snips of 0.5 seconds or less. No conversations, nor ambient sounds are recorded. These sound snips are sent to a server, where an artificial intelligence algorithm processes them, evaluating their characteristics and determining if they were in fact, cough. The server then sends that data back to the mobile and the study investigator, so those files labeled as cough episodes are displayed by the app. HyfeApp is a wellness status tool. Just like similar apps that count calories, steps or snores. HyfeApp simply counts episodes of cough.

### **Benefits and risks of participating**

HyfeApp will allow you to have a record of the number of times you cough every day, and of any changes compared to previous days. However, it is not a diagnostic or treatment tool. Therefore, it does not provide medical advice, nor replaces healthcare services. HyfeApp is not medical equipment. If you ever have doubts regarding your health condition or status, you should consult a doctor, or in case of emergency, communicate with proper emergency services.

We are aware that recording sounds from a mobile phone generates doubts regarding the handling of information and the participants' privacy. As explained before, HyfeApp does not record conversations or ambient sounds, and the 0.5 second sound snips are too short to identify

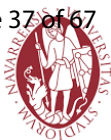

1  
2  
3 participants. However, if linked to other metadata (such as telephone numbers),  
4 these sounds could allow identification. For this reason, all the information transmitted by the app is  
5 encrypted and handled following standard safety protocols. This way, we can make sure that only the  
6 researchers can access potentially identifiable data.

7  
8 You will not be paid for your participation.  
9  
10  
11  
12  
13

#### 14 **Confidentiality**

15 All the information collected in this study will be codified in such a way that it cannot be linked to your  
16 personal data. Only the principal and co-investigators involved in this study will know your name, and  
17 an ID number will be used to refer to you in every document or communication. The computers used  
18 to store and analyze the data will be password-protected and only authorised researchers will have  
19 access to them.  
20  
21

22 The Universidad de Navarra, as the data controller, complies with the Organic Law 3/2018, of  
23 December 5, and other Spanish data protection regulations in force. Therefore, it is important that  
24 you know the following information:  
25

- 26 • In addition to the rights that you already know (access, modification, refusal and cancellation of  
27 data), you can now also limit the processing of incorrect data, request a copy, or have the data that  
28 you provided be transferred to a third party (portability) for the study. To exercise your rights, contact  
29 the Institution's Data Protection Officer at [protecciondedatosnav@unav.es]. You also have the right  
30 to contact the Data Protection Agency if you are not satisfied.  
31  
32
- 33 • Both the Center and the Promoter are respectively responsible for the processing of your data and  
34 undertake to comply with the data protection regulations in force. The data collected for the study  
35 will be identified by a code, so that information that can identify you is not included, and only your  
36 study doctor / collaborators will be able to relate said data to you and to your medical history.  
37 Therefore, your identity will not be revealed to any other person except to the health authorities,  
38 when required or in cases of medical emergency. The Research Ethics Committees, the  
39 representatives of the Health Authority in matters of inspection and the personnel authorized by the  
40 Sponsor, may only access to verify personal data, clinical study procedures and compliance with the  
41 rules of good clinical practice (always maintaining the confidentiality of the information).  
42  
43
- 44 • The Researcher and the Sponsor are obliged to keep the data collected for the study for at least 25  
45 years after its completion. Subsequently, your personal information will only be kept by the center for  
46 the care of your health and by the promoter for other scientific research purposes if you have given  
47 your consent to do so, and if this is allowed by the law and applicable ethical requirements.  
48  
49
- 50 • If we transfer your encrypted data outside the EU to our group entities, service providers or scientific  
51 researchers who collaborate with us, the participant's data will be protected with safeguards such as  
52 contracts or other mechanisms by the protection authorities of data. If the participant wants to know  
53 more about it, he or she can contact the promoter's Data Protection Officer  
54 [protecciondedatosnav@unav.es].  
55  
56

#### 57 **Economic Compensation**

58 The study promoter is responsible for managing the funds. Before doing a research study, the  
59 promoter must have signed a contract with the center where the study will take place, and the doctors  
60

1  
2  
3 who will conduct the study. Your participation in this study will not cost you any  
4 extra money beyond your standard medical procedures. Routine medical assistance will have to be  
5 paid by the social security network, your medical insurance, or yourself.  
6

7 You will not receive any payment or monetary compensation for taking part in this study.  
8  
9

### 10 **Other relevant information**

11 Any new information regarding the app to be used in this study and that could affect your disposition  
12 to take part in it, discovered after you have decided to participate, will be communicated to you as  
13 soon as possible.  
14

15 If you wish to withdraw your consent to take part in the study, no further personal data will be added  
16 to the database. You can also demand the destruction of any previously retained identifiable  
17 information, to prevent new analysis from being carried on.  
18

19 You must also know that you could be excluded from the study if the promoter and/or researchers  
20 consider it to be adequate, either for your own safety, to prevent any adverse consequence deriving  
21 from your participation, or because they consider you are not complying with the established  
22 procedures. In any case, you will always receive a proper explanation of what caused your withdrawal  
23 from the study.  
24  
25

### 26 **Sharing the results**

27 At all time, you will have access to the knowledge we get from the research upon request to the  
28 principal investigator. We will not share your name, health status or where you live. After this, we will  
29 publish the results so that other interested people may learn from our research. You will be able to  
30 ask the status of this study and its findings by a direct request to the principal investigator.  
31  
32

### 33 **Right to refuse or withdraw**

34 You don't have to take part in this research study if you do not wish so. You have the right not to sign  
35 this form. If you do not sign this form, you cannot take part in this research study. This is because we  
36 need your written permission to use your information. You have the right to leave the research study.  
37 If you would like to leave the research study, please tell a member of the study staff. You do not need  
38 to explain why you want to leave.  
39  
40

### 41 **Who to contact?**

42 If you are not satisfied with the way this study was conducted, or if you have any concerns,  
43 complaints or general questions about your rights as a participant, please contact the Patient  
44 Attention Office at the Clínica Universidad de Navarra by phone (+34 948 255 400) or email  
45 [atpacientun@unav.es](mailto:atpacientun@unav.es) to talk with someone independent of the research team.  
46  
47

48 If you have any questions about this study or study procedures now or in the future, you can call Dr.  
49 Carlos Chaccour. Tel number: 628 659 003 who is the Principal Investigator of the study. You can call  
50 Monday-Friday from 8.00 to 17.00 hrs.  
51

52 By signing the following informed consent, you agree to comply with the previously explained study  
53 procedures.  
54  
55  
56  
57  
58  
59  
60



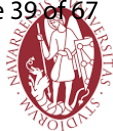

1  
2  
3  
4  
5  
6  
7  
8  
9  
10  
11  
12  
13  
14  
15  
16  
17  
18  
19  
20  
21  
22  
23  
24  
25  
26  
27  
28  
29  
30  
31  
32  
33  
34  
35  
36  
37  
38  
39  
40  
41  
42  
43  
44  
45  
46  
47  
48  
49  
50  
51  
52  
53  
54  
55  
56  
57  
58  
59  
60

**Written informed consent form**

**Study title:** Acoustic surveillance and digital cough monitoring at population level for early respiratory disease outbreak detection, an exploratory observational study

**Promoter code**

Version and date:

I, (name and surname)

.....

Have read the information sheet presented above.  
I have been allowed to ask questions about the study.  
I have received sufficient information about the study to make a decision.

I have spoken to:

.....

(Name and surname of researcher)

I understand that my participation is voluntary.

I understand I can withdraw from the study:

1. Whenever I want to.
2. Without having to explain my reasons.
3. Without repercussions regarding my access to healthcare.

I freely and willingly accept to participate in this study. I give my consent for the access and usage of my data within the conditions previously detailed in the information sheet.

**Researcher's signature**

**Name:**

**Date:**

**Researcher's signature**

**Participant's signature**

**Signature of the legal representative or impartial witness (cross out if not applicable)**

**Name:**

**Name::**

**DNI:**

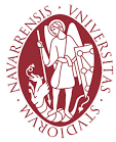

1  
2  
3  
4  
5  
6  
7  
8  
9  
10  
11  
12  
13  
14  
15  
16  
17  
18  
19  
20  
21  
22  
23  
24  
25  
26  
27  
28  
29  
30  
31  
32  
33  
34  
35  
36  
37  
38  
39  
40  
41  
42  
43  
44  
45  
46  
47  
48  
49  
50  
51  
52  
53  
54  
55  
56  
57  
58  
59  
60

**Date:**

**Date::**

**Date:**

**Reason to sign:**

This document will be signed in duplicate, one copy will be kept by the researcher and another one by the participant.

For peer review only

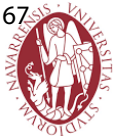

ID del participante:

**Hoja de información y autorización a menores de entre 13 y 18 años para participar en el estudio titulado:**

**Version 3.0 (6 de enero de 2021)**

*Vigilancia acústica y monitorización digital de la tos a nivel poblacional para la detección temprana de brotes de enfermedades respiratorias. Un estudio observacional exploratorio.*

Este formulario de autorización es para aquellos menores de edad dispuestos a participar en el estudio observacional previamente descrito.

**Promotor**

Clínica Universidad de Navarra/Universidad de Navarra, Avenida de Pío XII, 36  
31008 Pamplona.

**Financiación:** Este estudio está siendo financiado por el Centre Hospitalier de l'Université de Montreal (CHUM) y la fundación Patrick J. McGovern a través de una subvención otorgada al co-investigador Simon Grandjean Lapierre (*Early diagnosis of COVID-19 by utilizing Artificial Intelligence and Acoustic Monitoring*)

**Investigador Principal**

**Carlos Chaccour**

**Teléfono +34 666 293 112**

**Email [cchaccour@unav.es](mailto:cchaccour@unav.es)**

Este formulario de autorización cuenta con dos partes:

- Hoja de información (para compartir la información relevante al proyecto con usted)
- Certificado de Autorización (donde se le solicitará su firma y la de su padre, madre o representante legal, en caso de que acepte participar).

Le será proveída una copia del Certificado de Autorización.

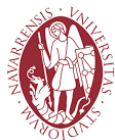

## Parte I: Hoja de Información

### Introducción

Nos dirigimos a usted para informarle sobre un estudio de investigación en el que se le invita a participar. El estudio ha sido aprobado por el Comité de Ética de la Investigación de la Universidad de Navarra, el comité de ética de la investigación con medicamentos de Navarra y el comité independiente de ética del Centre Hospitalier de l'Université de Montreal (CHUM), en Canadá.

No es necesario que tome una decisión hoy. Puede tomarse el tiempo de hablar y discutir su participación con cualquier persona con la que se sienta cómodo haciéndolo.

Con este documento pretendemos que usted reciba la información adecuada para que pueda entender de qué se trata este estudio y decidir si quiere o no participar en el mismo. Es posible que haya palabras o información que no entienda. De ser así, siéntase libre de preguntar cualquier duda.

### Generalidades del estudio

Los coronavirus son un grupo de virus que causan infecciones respiratorias generalmente leves. Sin embargo, un miembro de este grupo, el SARS-Cov-2, es el responsable de provocar la COVID-19, una enfermedad potencialmente peligrosa que desde finales del 2019 se ha extendido a lo largo de todo el mundo.

Uno de los elementos necesarios para contener el avance de la pandemia de COVID-19 es entender su escala real. Esto es particularmente importante ahora que los brotes regulares en zonas en las que simultáneamente ocurre transmisión a una menor escala se han convertido en una realidad. Uno de los mayores obstáculos de los sistemas sanitarios es la limitada capacidad de hacer pruebas diagnósticas, lo que se traduce en retrasos en la búsqueda de atención médica, así como en la recolección de la información necesaria para planear intervenciones que limiten la expansión de la enfermedad.

La gran mayoría de pacientes con COVID-19 presentan tos como un síntoma temprano de la enfermedad. Este estudio pretende evaluar la utilidad de una aplicación para el móvil, llamada HyfeApp, que registra y evalúa patrones de tos, como complemento a las estrategias de vigilancia epidemiológica existentes. Para esto, estimamos que será necesario grabar y analizar al menos 15,500 episodios individuales de tos.

Por eso esperamos que el mayor número posible de voluntarios instale la aplicación, la cual se ejecuta en segundo plano en el móvil. Aunque HyfeApp tiene acceso continuo al micrófono de su móvil, ha



sido diseñada para procesar únicamente sonidos compatibles con las características de la tos humana. Cuando uno de estos sonidos es detectado y grabado por la aplicación, un algoritmo de inteligencia artificial lo estudia y en caso de decidir qué se trata de un episodio de tos, se guarda junto a información sobre la ubicación geográfica y el momento en que ocurrió, que es proporcionada por el sistema GPS del móvil.

Aparte de la información suministrada por la aplicación, revisaremos los registros médicos de aquellas personas dispuestas a participar que acudan a consulta en el sistema nacional de salud, o la Clínica Universidad de Navarra. El objetivo de esto es recolectar información sobre la presencia de tos durante la exploración médica, o el diagnóstico de alguna enfermedad respiratoria en alguna de las visitas. Solo se consultará información relacionada con alguna de las siguientes condiciones:

- Tos no específica.
- Infecciones del tracto respiratorio superior.
- Faringitis.
- Asma.
- Bronquitis.
- Enfermedad Broncopulmonar Obstructiva Crónica (EBPOC).
- COVID-19
- Enfermedad por Reflujo Gastroesofágico (ERGE)
- Influenza
- Neumonía (por cualquier causa)
- Infección por virus sincitial respiratorio (VSR)
- Infecciones respiratorias inespecíficas.

Otros exámenes paraclínicos a ser recolectados incluyen:

- Microbiología
  - pruebas de COVID-19
  - PCR para influenza
  - Cultivo de esputo
- Hematología
  - Hematología completa
  - Prueba del dímero D.
- Bioquímica
  - Proteína C reactiva
  - Procalcitonina
  - CPK
  - LDH
  - Ferritina

Aparte de la información obtenida de la app y sus registros médicos, también le pediremos a un grupo reducido de participantes que formen parte de discusiones grupales focalizadas, para explorar los desafíos que representa el uso continuo de HyfeApp, y su participación en el estudio. En caso de que se le solicite participar, usted podrá aceptar o negarse.

## Duración

Se recolectará información inicialmente por un período de 1 mes, consultándosele en ese momento su disposición a seguir participando por 3 y 6 meses. Usted podrá negarse a seguir participando en el estudio en cualquier momento.

## Procedimientos del estudio

Usted no puede participar en el ensayo si usted:

- No puede o no quiere aceptar compartir su información codificada relacionada a sus registros de tos con bases de datos globales usadas para refinar los diagnósticos basados en perfiles acústicos.
- Si no posee un teléfono inteligente en el que se pueda ejecutar HyfeApp.
- Tiene menos de 13 años de edad.
- No es un estudiante/trabajador de la Universidad, o un paciente diagnosticado con una enfermedad causante de tos en la Clínica Universidad de Navarra.
- Si no reside en Navarra.

Si usted decide participar, un miembro de nuestro equipo lo ayudará a instalar la aplicación en su móvil. No serán necesarias nuevas visitas de parte del equipo de investigación, pero serán contactados una vez al mes para obtener comentarios sobre su experiencia usando la aplicación y ratificar su consentimiento y disposición a seguir participando en el estudio. También podrá ser contactado vía correo electrónico para recibir actualizaciones periódicas sobre el estado del proyecto y sus resultados preliminares.

### **La aplicación HyfeApp**

HyfeApp es una aplicación móvil disponible para los sistemas operativos Android y iOS (Apple), desarrollada por un equipo multidisciplinario que incluye analistas de datos, desarrolladores de software y médicos especialistas en enfermedades infecciosas.

### **¿Qué cosas hace HyfeApp?**

HyfeApp se ejecuta constantemente en el segundo plano de su móvil, sin interferir con el funcionamiento de otras aplicaciones, pero teniendo acceso a su micrófono y grabando recortes explosivos de sonido de menos de 0.5 segundos de duración. Ni las conversaciones, ni los sonidos de fondo son grabados. Estos recortes son enviados a un servidor, donde un algoritmo de inteligencia artificial identifica aquellos que presentan cambios súbitos y cortos en los decibeles, compatibles con episodios de tos. Posteriormente, otro algoritmo los procesa, evaluando otras características y determinando si efectivamente se trató de un episodio de tos. El servidor envía esta información de



vuelta al móvil, de forma que los archivos clasificados como tos se incorporan a los registros mostrados por la aplicación.

HyfeApp es una herramienta que le proporciona información sobre su estado de bienestar. Tal como herramientas similares que cuentan calorías, registran el número de pasos o ronquidos. La única diferencia es que HyfeApp cuenta episodios de tos.

### **Beneficios y riesgos por su participación en estudio**

HyfeApp le permitirá llevar un registro del número de veces que tose al día, así como evidenciar cambios con respecto a días anteriores. Sin embargo, no es una herramienta de diagnóstico o tratamiento médico. Por lo tanto, ni provee información o consejos médicos, ni sustituye de ninguna forma a los servicios sanitarios: HyfeApp no es un instrumento médico especializado. Si usted tiene alguna duda sobre su estado de salud, debe consultarlas con un médico o en caso de emergencia, llamar a los servicios respectivos inmediatamente .

Grabar sonidos desde un móvil inmediatamente genera dudas sobre la forma en que será manejada la información, y garantizada la privacidad de los participantes. Como hemos explicado anteriormente, HyfeApp no graba conversaciones ni sonidos de ambiente. Los segmentos de 0.5 segundos grabados por la aplicación no permiten identificar a los participantes. Sin embargo, algunos de estos sonidos pudiesen permitir identificar al participante si son interpretados en conjunto con otra metadata registrada por la aplicación (como el número de teléfono, por ejemplo). Por esta razón, toda la información transmitida por la aplicación estará encriptada y manejada según los protocolos de seguridad estándar empleados en este tipo de estudios. De esta forma, únicamente los investigadores podrán asociar los datos recolectados por la aplicación, a otros elementos que permitan identificar a los participantes.

Usted no recibirá un pago por su participación.

### **Participación Voluntaria**

Debe saber que su participación en este estudio es voluntaria y que puede decidir no participar o cambiar su decisión y retirar la autorización en cualquier momento, sin que por ello se altere la relación con su médico ni se produzca perjuicio alguno en su tratamiento.

### **Pagos y Compensación Económica**

El promotor del estudio es el responsable de gestionar la financiación del mismo. Para la realización del estudio, el promotor ha firmado un contrato con el centro donde se va a realizar y con el médico del estudio.

Su participación en este estudio no le causará costes adicionales diferentes de los asociados a su tratamiento habitual. La asistencia rutinaria deberá ser pagada por la seguridad social, por su seguro médico o por usted mismo.

Ni usted ni sus padres/representantes recibirán un pago por su participación en este estudio.

## Otra Información

Cualquier nueva información referente a la aplicación utilizada en el estudio y que pueda afectar su disposición para participar en el mismo, que se descubra durante su participación, le será comunicada lo antes posible.

Si usted decide retirar el consentimiento para participar en este estudio no se añadirán nuevos datos a la base de datos y puede exigir la destrucción de cualquier información identificable previamente retenida, para evitar la realización de nuevos análisis.

También debe saber que puede ser excluido del estudio si el promotor y/o los investigadores del mismo lo consideran oportuno, ya sea por motivos de seguridad, por cualquier acontecimiento adverso derivado de su participación, o porque consideren que no está cumpliendo con los procedimientos establecidos. En cualquiera de los casos, usted recibirá una explicación adecuada del motivo que ha ocasionado su retirada del estudio.

## Confidencialidad

Toda la información recolectada en este estudio se mantendrá codificada, de forma que no pueda ser vinculada a sus datos personales. Solo el investigador principal y los co-investigadores sabrán su nombre y en cualquier documento o comunicación se usará un número de identificación personal asignado a cada participante. Las computadoras utilizadas para analizar los datos de este estudio tendrán contraseñas y solo investigadores autorizados podrán acceder a ellas.

La Universidad de Navarra, como responsable del tratamiento de datos, se compromete al cumplimiento de la Ley Orgánica del 3/2018, de 5 de diciembre y demás normativa de protección de datos en vigor. Por ello, es importante que conozca la siguiente información:

- Además de los derechos que ya conoce (acceso, modificación, oposición y cancelación de datos) ahora también puede limitar el tratamiento de datos que sean incorrectos, solicitar una copia o que se trasladen a un tercero (portabilidad) los datos que usted ha facilitado para el estudio. Para ejercer sus derechos, diríjase al Delegado de Protección de Datos de la institución en [protecciondedatosnav@unav.es]. Así mismo tiene derecho a dirigirse a la Agencia de Protección de Datos si no quedara satisfecho/a.
- Tanto el Centro como el Promotor son responsables respectivamente del tratamiento de sus datos y se comprometen a cumplir con la normativa de protección de datos en vigor. Los datos recogidos para el estudio estarán identificados mediante un código, de manera que no se incluya información que pueda identificarle, y sólo su médico del estudio/colaboradores podrá relacionar dichos datos con usted y con su historia clínica. Por lo tanto, su identidad no será revelada a ninguna otra persona salvo a las autoridades sanitarias, cuando así lo requieran o en casos de urgencia médica. Los Comités de Ética de la Investigación, los representantes de la Autoridad Sanitaria en materia de inspección y el personal autorizado por el Promotor, únicamente podrán acceder para comprobar los datos personales, los procedimientos del estudio clínico y el cumplimiento de las normas de buena práctica clínica (siempre manteniendo la confidencialidad de la información).





1  
2  
3  
4  
5  
6  
7  
8  
9

- El Investigador y el Promotor están obligados a conservar los datos recogidos para el estudio al menos hasta 25 años tras su finalización. Posteriormente, su información personal sólo se conservará por el centro para el cuidado de su salud y por el promotor para otros fines de investigación científica si usted hubiera otorgado su consentimiento para ello, y si así lo permite la ley y requisitos éticos aplicables.

10  
11  
12  
13  
14  
15  
16

- Si realizáramos transferencia de sus datos codificados fuera de la UE a las entidades de nuestro grupo, a prestadores de servicios o a investigadores científicos que colaboren con nosotros, los datos del participante quedarán protegidos con salvaguardas tales como contratos u otros mecanismos por las autoridades de protección de datos. Si el participante quiere saber más al respecto, puede contactar al Delegado de Protección de Datos del promotor [[protecciondedatosnav@unav.es](mailto:protecciondedatosnav@unav.es)].

### 17 18 **Compartiendo los Resultados**

19  
20  
21  
22  
23  
24  
25  
26  
27

Usted tendrá acceso a todo el conocimiento generado por esta investigación en todo momento, solo debe preguntar al investigador principal. No compartiremos su nombre, estado de salud o dirección. Eventualmente, los resultados serán publicados, de forma tal que cualquier persona interesada en conocerlos, pueda acceder a ellos. Usted podrá solicitar información sobre el status y los resultados del estudio, preguntándole directamente al investigador principal.

### 28 **¿Quién aprobó esta investigación?**

29  
30  
31  
32  
33  
34

El estudio ha sido aprobado por el Comité de Ética de la Investigación de la Universidad de Navarra, el comité de ética de la investigación con medicamentos de Navarra y el comité independiente de ética del Centre Hospitalier de l'Université de Montreal (CHUM), en Canadá.

### 35 **Derecho a negarse a participar o abandonar el estudio**

- 36  
37  
38  
39  
40  
41  
42  
43  
44  
45  
46  
47  
48  
49
- No tiene que participar en este estudio si no desea hacerlo.
  - Tiene el derecho a NO firmar este formulario. Si no desea firmar este formulario, no podrá participar en este estudio de investigación. Esto se debe a que necesitamos su permiso por escrito antes de poder usar su información.
  - Tiene el derecho a abandonar este estudio incluso después de haber aceptado participar. Si decide abandonar el estudio, no usaremos su información. En caso de decidir abandonar el estudio, por favor comuníquese con un miembro de nuestro personal. No tiene que explicar sus razones para abandonar el estudio.

### 50 **A quién contactar**

51  
52  
53  
54  
55  
56  
57  
58  
59  
60

Si no está satisfecho con la forma en que se llevó a cabo este estudio, o tiene alguna duda, queja o pregunta sobre sus derechos como participante, por favor contacte a la oficina de atención al paciente de la Clínica Universidad de Navarra, por teléfono (+34 948 255 400) o correo electrónico ([atpacientun@unav.es](mailto:atpacientun@unav.es)), para hablar con alguien independiente del equipo investigador.

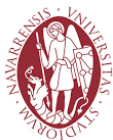

Si tiene alguna duda sobre este estudio o sus procedimientos, ahora o en el futuro, puede comunicarse con: Dr. Carlos Chaccour. Teléfono: 628 659 003. Quién es el investigador principal del estudio. Puede llamar de Lunes a Viernes entre las 8:00 y las 17:00 horas.

## Parte II: Certificado de Autorización

### Autorización del padre o representante legal

He leído o se me ha leído la información anterior. Se me permitió hacer preguntas al respecto y cualquier pregunta que haya hecho me fue contestada de forma satisfactoria.

- Autorizo que mi hijo/hija o representado legal participe en este proyecto de investigación.
- No autorizo que mi hijo/hija o representado legal participe en este proyecto de investigación y no he firmado la autorización presente a continuación.

Nombre del padre o representante legal:

Firma del padre o representante legal:

Fecha (dd/mm/aaaa)

### Consentimiento del menor de edad

He leído o se me ha leído la información anterior. Se me permitió hacer preguntas al respecto y cualquier pregunta que haya hecho me fue contestada de forma satisfactoria.

- Acepto participar en este proyecto de investigación.
- No acepto participar en este proyecto de investigación y no he firmado la autorización presente a continuación.

En caso de que el menor acepte participar:

Nombre del menor de edad:

Firma del menor de edad

Fecha (dd/mm/aaaa):

En caso de no saber leer o escribir

Un testigo que sepa leer o escribir debe firmar (este individuo debería de ser posible, haber sido elegido por el participante, no su padre o representante, y no estar relacionado con el equipo de



investigación). Todo participante que no sepa leer o escribir debe presentar la huella digital de su pulgar.

Soy testigo de que este formulario fue leído de forma precisa al participante en potencia, y que dicho individuo tuvo la oportunidad para hacer preguntas. Confirmando que el individuo en cuestión ha autorizado su participación de forma voluntaria.

Nombre del testigo:

Firma del testigo:

Fecha (dd/mm/aaaa):

Huella digital del pulgar del participante:

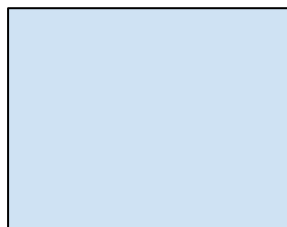

#### *Declaración del encargado de obtener la autorización*

He leído de forma precisa la hoja de información al participante en potencia, y he hecho todo lo posible para asegurarme de que entendiera que se realizarán los siguientes procedimientos:

1. La aplicación HyfeApp deberá ser descargada en el móvil del participante.
2. La aplicación HyfeApp registrará y almacenará sonidos compatibles con la tos humana durante un período de un año, entre octubre de 2020 y septiembre de 2021.
3. En caso de acudir a una consulta en el sistema nacional de salud, la información médica del participante podrá ser accedida para buscar evidencia clínica de tos o alguna enfermedad respiratoria.

Confirmando que al participante se le ha dado la oportunidad de hacer preguntas sobre la investigación y que todas esas preguntas han sido contestadas de forma apropiada y de la mejor forma posible. Confirmando que el individuo no ha sido forzado a autorizar su participación, y que su consentimiento ha sido libre y voluntario.

Una copia de este certificado de autorización ha sido proporcionada al padre o representante legal del participante.

El padre o representante legal del participante ha firmado el consentimiento informado: Si \_\_\_\_  
No \_\_\_\_

Nombre de la persona a cargo de obtener el consentimiento:



1  
2  
3  
4  
5  
6  
7  
8  
9  
10  
11  
12  
13  
14  
15  
16  
17  
18  
19  
20  
21  
22  
23  
24  
25  
26  
27  
28  
29  
30  
31  
32  
33  
34  
35  
36  
37  
38  
39  
40  
41  
42  
43  
44  
45  
46  
47  
48  
49  
50  
51  
52  
53  
54  
55  
56  
57  
58  
59  
60

Firma de la persona a cargo de obtener el consentimiento:

Fecha (dd/mm/aaaa):

For peer review only



## English version

Participant ID:

**Information sheet and assent form for the participation of minors aged 13-18 years in the research study titled:**Version 3.0 January 6<sup>th</sup>, 2021

*Acoustic surveillance and digital cough monitoring at population level for early respiratory disease outbreak detection, an exploratory observational study*

This assent form is meant for minors who are interested in taking part in the previously mentioned observational study. Please read this form carefully with your parents or legal guardian and ask any questions you might have.

**Promoter**

Clínica Universidad de Navarra/Universidad de Navarra, Avenida de Pío XII, 36  
31008 Pamplona.

**Funder**

This study is funded by the Centre Hospitalier de l'Université de Montreal (CHUM) and the Patrick J. McGovern Foundation through a grant awarded to Co-Investigator Simon Grandjean Lapierre (*Early diagnosis of COVID-19 by utilizing Artificial Intelligence and Acoustic Monitoring*)

**Main Researcher**

*Carlos Chaccour*  
*Teléfono +34 666 293 112*  
*Email cchaccour@unav.es*

This document consists of two parts:

- Information sheet (meant to explain relevant information regarding the project).
- Assent form (where we will require your signature, and that of your parent or legal guardian, if you decide to take part in it).

You will be provided a copy of this document for your personal records.

## Part I: Information sheet

### Introduction

The objective of this document is to inform you about the characteristics of a research study you have been invited to participate in. The study has been approved by the Committee of Research Ethics of the Universidad de Navarra and the Committee of Medication Ethics of Navarra (Spain), as well as the independent ethics committee from the Centre Hospitalier de l'Université de Montreal (CHUM), in Canada.

This document aims to provide you with proper information, so you can understand this study and decide by yourself if you are willing to take part or not in it. Please read this information document carefully and we will answer any questions that might come up afterwards. You can also discuss this with people you trust before making a decision.

### Objective of the research

Coronaviruses are a group of viruses that cause generally mild respiratory disease. However, a member of this group, the SARS-Cov-2, is responsible for causing COVID-19, a potentially dangerous disease that has spread across the globe since 2019.

One of the necessary interventions to contain the COVID-19 pandemic is understanding its real scale. This is particularly important now that new outbreaks are being regularly reported in areas with ongoing low-level transmission. A major limitation in this process is the limited diagnostic capabilities of many countries, which translates into delays in the search of medical attention and the collection of necessary epidemiological data.

Most patients with COVID-19 present cough as an early symptom of disease. This study aims to evaluate the usefulness of a mobile app called HyfeApp, which registers and studies cough patterns, as a complement to existing disease surveillance strategies. To do this, we will need to record and analyse about 15,500 individual episodes of cough. The town of Cizur Menor has been selected as the location of the initial studies of this new platform.

For this reason, we need as many people as possible installing the app, which runs in the background of your mobile. Although HyfeApp has continuous access to the mobile's mic, it has been designed to exclusively process sounds that match the characteristics of human cough. When one of these sounds is detected and recorded, an artificial intelligence algorithm studies it and where it determines it does sound like an episode of cough, the record is stored, along with geographical information and time, provided by the mobile's GPS.

Besides the information from the app, we will also review the medical records of those participants who present for a medical consultation in the national health system or the Clinica Universidad de Navarra. The objective of this is to collect information about the presence of cough, or any respiratory disease during one of those visits. Data from your medical chart will be obtained by the investigators from your local clinic or hospital. This includes without being limited to information related to any of the following conditions will be reviewed:

- Non-specific cough
- Non-specific upper respiratory tract infections
- Pharyngitis
- Asthma
- Bronchitis



- Chronic Obstructive Pulmonary Disease (COPD)
- COVID-19
- Gastro-esophageal reflux disease (GERD)
- Influenza
- Pneumonia (any cause)
- Respiratory Syncytial virus
- Non-specific respiratory tract infections

Additional laboratory test data to be captured from the selected visits includes:

- Microbiology
  - COVID-19 tests
  - Flu PCR
  - Sputum culture
- Hematology
  - Full blood count
  - D-dimer test
- Biochemistry
  - C-reactive protein
  - Procalcitonin
  - CPK
  - LDH
  - Ferritin

Besides the information from the app and medical charts, we will also solicit a restricted number of participants to participate in focus group discussions to explore the challenges related to using HyfeApp and participating in this study. If solicited, it will be your right to accept or refuse to participate in those focus groups.

### **Duration**

Data will be initially collected for a one-month period. You will then be offered the opportunity to continue in the study for 3 and 6 months. You can refuse continuing in the study at any point.

### **Study Procedures**

You will not be able to enroll in this study if you:

- Are incapable or unwilling to accept to share your codified cough data with multicenter databases aiming at refining acoustic-based diagnostics.
- Are under 13 years of age.
- Do not own a smartphone able to run HyfeApp.
- Are not a student/worker at the University of Navarra or a patient diagnosed with cough-related disease at the Clínica Universidad de Navarra.
- Are not a resident of Navarra

In case you decide to take part, a member of our team will help you install the app on your mobile. No further visits from the research team will be necessary. But you might be contacted once a month to collect feedback on your experience using the app, as well as to confirm your willingness to continue in the study. You might also receive periodic updates via email, to keep you informed on the status of the project and relevant preliminary results.

### **About HyfeApp**

HyfeApp is a mobile app available for Android and IOS (Apple) operative systems, developed by a multidisciplinary team of data scientists, software developers and infectious disease physicians.

### What does HyfeApp do?

HyfeApp runs in the background of your mobile, without interfering with any other running app, but having constant access to your mic and recording explosive sound snips of 0.5 seconds or less. No conversations, nor ambient sounds are recorded. These sound snips are sent to a server, where an artificial intelligence algorithm identifies those presenting sudden, shortchanges in decibel levels, compatible with cough episodes. Then, another algorithm processes them, evaluating its characteristics and determining if they were in fact, cough. The server then sends that data back to the mobile, so those files labeled as cough episodes are displayed by the app. HyfeApp is a wellness status tool. Just like similar apps that count calories, steps or snores. The only difference is that HyfeApp counts episodes of cough.

### Benefits and risks of participating

HyfeApp will allow you to have a record of the number of times you cough every day, and of any changes compared to previous days. However, it is not a diagnostic or treatment tool. Therefore, it does not provide medical advice, nor replaces healthcare services. HyfeApp is not medical equipment. If you ever have doubts regarding your health condition or status, you should consult a doctor, or in case of emergency, communicate with proper emergency services.

We are aware that recording sounds from a mobile phone generates doubts regarding the handling of information and the participants' privacy. As explained before, HyfeApp does not record conversations or ambient sounds, and the 0.5 second sound snips are too short to identify participants. However, if linked to other metadata (such as telephone numbers), these sounds could allow identification. For this reason, all the information transmitted by the app is encrypted and handled following standard safety protocols. This way, we can make sure that only the researchers can access potentially identifiable data.

You will not be paid for your participation.

### Voluntary participation

You must know that your participation in this study is voluntary and you can decide not to take part, or change your mind and resign your consent at any time in the future. This will not affect your relationship with your healthcare provider, nor harm your access to proper medical treatment in any way.

### Economic Compensation

The study promoter is responsible for managing the funds. Before, doing a research study, the promoter must have signed a contract with the center where the study will take place, and the doctors who will conduct the study. Your participation in this study will not cost you any extra money beyond your standard medical procedures. Routine medical assistance will have to be paid by the social security network, your medical insurance, or yourself.



You will not receive any payment or monetary compensation for taking part in this study.

### **Other information**

Any new information regarding the app to be used in this study and that could affect your disposition to take part in it, discovered after you have decided to participate, will be communicated to you as soon as possible.

If you wish to withdraw your consent to take part in the study, no further personal data will be added to the database. You can also demand the destruction of any previously retained identifiable information, to prevent new analysis from being carried on.

You must also know that you could be excluded from the study if the promoter and/or researchers consider it to be adequate, either for your own safety, to prevent any adverse consequence deriving from your participation, or because they consider you are not complying with the established procedures. In any case, you will always receive a proper explanation of what caused your withdrawal from the study.

### **Confidentiality**

All the information collected in this study will be codified in such a way that they cannot be linked to your personal data. Only the main researcher and co-researchers will know your name, and an ID number will be used to refer to you in every document or communication. The computers used to store and analyse the data will be password-protected and only authorised researchers will have access to them.

The Clínica Universidad de Navarra, as the data controller, complies with the Organic Law 3/2018, of December 5, and other Spanish data protection regulations in force. Therefore, it is important that you know the following information:

- In addition to the rights that you already know (access, modification, refusal and cancellation of data), you can now also limit the processing of incorrect data, request a copy, or have the data that you provided be transferred to a third party (portability) for the study. To exercise your rights, contact the Institution's Data Protection Officer at [protecciondedatosnav@unav.es]. You also have the right to contact the Data Protection Agency if you are not satisfied.

- Both the Center and the Promoter are respectively responsible for the processing of your data and undertake to comply with the data protection regulations in force. The data collected for the study will be identified by a code, so that information that can identify you is not included, and only your study doctor / collaborators will be able to relate said data to you and to your medical history. Therefore, your identity will not be revealed to any other person except to the health authorities, when required, or in cases of medical emergency. The Research Ethics Committees, the representatives of the Health Authority in matters of inspection and the personnel authorized by the Sponsor, may only access to verify personal data, clinical study procedures and compliance with the rules of good clinical practice (always maintaining the confidentiality of the information).

- The Researcher and the Sponsor are obliged to keep the data collected for the study for at least 25 years after its completion. Subsequently, your personal information will only be kept by the center for

1  
2  
3 the care of your health and by the promoter for other scientific research  
4 purposes if you have given your consent to do so, and if this is allowed by the law and applicable  
5 ethical requirements.  
6

7  
8 • If we transfer your encrypted data outside the EU to our group entities, service providers or scientific  
9 researchers who collaborate with us, the participant's data will be protected with safeguards such as  
10 contracts or other mechanisms by the protection authorities of data. If the participant wants to know  
11 more about it, he or she can contact the promoter's Data Protection Officer  
12 [protecciondedatosnav@unav.es].  
13  
14  
15  
16  
17

### 18 **Sharing the results**

19 At all time, you will have access to the knowledge we get from the research upon request to the  
20 principal investigator. We will not share your name, health status or where you live. After this, we will  
21 publish the results so that other interested people may learn from our research. You will be able to  
22 ask the status of this study and its findings by a direct request to the principal investigator.  
23

### 24 **Who approved this research?**

25 The study has been approved by the Committee of Research Ethics of the Universidad de Navarra and  
26 the Committee of Medication Ethics of Navarra (Spain), as well as the independent ethics committee  
27 from the Centre Hospitalaire de l'Université de Montreal (CHUM), in Canada.  
28

### 29 **Right to refuse or withdraw**

30 You don't have to take part in this research study if you do not wish so. You have the right not to sign  
31 this form. If you do not sign this form, you cannot take part in this research study. This is because we  
32 need your written permission to use your information. You have the right to leave the research study.  
33 If you would like to leave the research study, please tell a member of the study staff. You do not need  
34 to explain why you want to leave.  
35  
36  
37

### 38 **Who to contact?**

39  
40 If you are not satisfied with the way this study was conducted, or if you have any concerns, complaints  
41 or general questions about your rights as a participant, please contact the Patient Attention Office at  
42 the Clínica Universidad de Navarra by phone (+34 948 255 400) or email [atpacientun@unav.es](mailto:atpacientun@unav.es) to talk  
43 with someone independent of the research team.  
44

45  
46 If you have any questions about this study or study procedures now or in the future, you can call Dr.  
47 Carlos Chaccour. Tel number 628 659 003 who is the Principal Investigator of the study. You can call  
48 Monday-Friday from 8.00 to 17.00 hrs.  
49

### 50 **Part II: Assent Form**

#### 51 **Authorization from the parent or legal guardian**

52 I have read, or have been read to the previous information. I was allowed to ask questions and I was  
53 provided with satisfactory answers to each one.  
54  
55

56  
57  I authorize my child/minor under my care to take part in this research project.  
58  
59  
60



I do not authorize my child/minor under my care to take part in this research project and I have not signed the Assent Form presented below.

Name of parent or legal guardian:

Signature of parent or legal guardian:

Date (dd/mm/yyyy):

**Consent from the minor**

I have read or have been read to the previous information. I was allowed to ask questions and I was provided with satisfactory answers to each one.

I accept to take part in this research project.

I do not accept to take part in this research project and I have not signed the assent form presented below.

In case the minor accepts to participate:

Name of minor:

Signature of minor:

Date (dd/mm/yyyy):

If illiterate:

A literate witness must sign this form (when possible, this person should be chosen by the participant and not be related to the research team). Every illiterate participant must still present a fingerprint of his/her thumb.

I confirm this form was properly and accurately read to the potential participant and that said individual has voluntarily consented to participate in the study.

Name of witness:

Signature of witness:

Date (dd/mm/yyyy):

Participant's fingerprint (thumb):

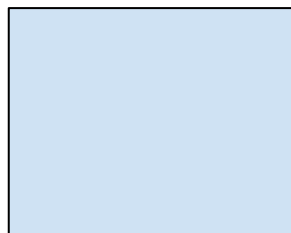

*Statement from the person responsible of getting written consent*

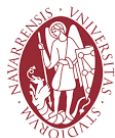

I have, to the best of my ability, read this information sheet to the potential participant and made my best effort to make sure he/she understood that the following procedures will be performed:

1. HyfeApp will be downloaded to the participant's mobile phone.
2. HyfeApp will register and store sounds that match the characteristics of human cough for a one-year period, between October 2020 and September 2021.
3. If the participant seeks medical attention through the national health network, his/her medical records could be accessed by the researchers to look for evidence of cough or any respiratory disease.

I confirm the participant has been allowed to ask questions and that all his/her questions have been answered to the best of my ability. I confirm the participant has not been coerced to take part in this study and that his consent was free and voluntary.

A copy of this form will be provided to the parent or legal guardian for personal records.

Has the parent or legal guardian signed the assent form?: Yes \_\_\_\_ No \_\_\_\_

Name of the person in charge of obtaining the participant's consent:

Signature of the person in charge of obtaining the participant's consent:

Date (dd/mm/yyyy):

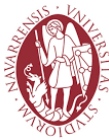

## Cuestionario complementario de información médica

Versión 2.0 (6 de enero, 2021)

### Información personal

Nombre: \_\_\_\_\_

Primer Apellido: \_\_\_\_\_

Segundo Apellido: \_\_\_\_\_

Fecha de nacimiento: \_\_\_\_\_

DNI: \_\_\_\_\_

Sistema operativo del móvil:

- Apple
- Android

Ciudad o pueblo \_\_\_\_\_ Avenida/Calle \_\_\_\_\_

Número \_\_\_\_\_ Escalera (izquierda o derecha, solo para departamentos) \_\_\_\_\_

Piso \_\_\_\_\_ Puerta \_\_\_\_\_

### Información de contacto:

Teléfono móvil: \_\_\_\_\_

Email: \_\_\_\_\_

**¿Usualmente usted recibe atención médica a través de cuál de los siguientes proveedores de salud?**

- Público (Seguridad Social/Osasunbidea)  Ambos
- Privado (Clínica Universidad de Navarra)

**¿Ha sufrido usted de alguna de las siguientes condiciones en el pasado, o sufre de alguna en la actualidad?**

- Tos de causa no específica o desconocida
- Infecciones no especificadas de las vías respiratorias altas (Sinusitis, otitis, laringitis)
- Faringitis
- Asma
- Bronquitis
- Enfermedad broncopulmonar obstructiva crónica (EBPOC)
- COVID-19
- Enfermedad de Reflujo Gastroesofágico (ERGE)
- Influenza estacional

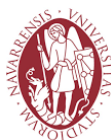

- 1  
2  
3  
4  Neumonía (sin importar la causa)  
5  Infección por virus sincitial respiratorio  
6  
7  Otras infecciones no especificadas del tracto respiratorio inferior  
8  
9  Fumador  
10  
11  Otra condición  
12

13  
14 En caso de haber seleccionado la

15    v      v

16 explique a continuación a que se  
17 refiere:  
18

19 \_\_\_\_\_  
20 \_\_\_\_\_  
21 \_\_\_\_\_  
22

23  
24  
25  
26  
27  
28  
29  
30  
31  
32  
33  
34  
35  
36  
37  
38  
39  
40  
41  
42  
43  
44  
45  
46  
47  
48  
49  
50  
51  
52  
53  
54  
55  
56  
57  
58  
59  
60

Peer review only

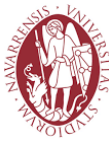

**English version**

**Medical Information Questionnaire for participants recruited at the University of Navarra**

**Version 2.0 (January 6<sup>th</sup>, 2021)**

**The following information must be filled by participants who have consented to take part in the study**

**Participant information**

Name: \_\_\_\_\_

First surname: \_\_\_\_\_

Second surname: \_\_\_\_\_

DOB: \_\_\_\_\_

DNI: \_\_\_\_\_

v    u:   o     v P    u

Apple

Android

Residence city \_\_\_\_\_ Street \_\_\_\_\_

Number \_\_\_\_\_ Stair (left or right, only for apartment buildings) \_\_\_\_\_

Floor \_\_\_\_\_ Door \_\_\_\_\_

**Participant contact**

Mobile phone: \_\_\_\_\_

Email: \_\_\_\_\_

**Usually, you receive medical care from which of the following providers?**

Public health network (Social Security/Osasunbidea)

Private (Clínica Universidad de Navarra)

Both

**Please indicate if you have suffered from any of the following medical conditions**

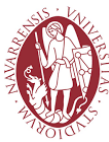

- Non-specific cough
- Non-specific upper respiratory tract infections
- Acute pharyngitis
- Asthma
- Bronchitis
- Chronic Obstructive Pulmonary Disease (COPD)
- COVID-19
- Gastroesophageal Reflux Disease (GERD)
- Influenza
- Pneumonia (any cause)
- Respiratory Syncytial Virus Disease
- Another non-specific lower respiratory tract infection
- Smoker
- Other condition (please specify): \_\_\_\_\_



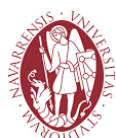

Universidad  
de Navarra

1  
2  
3  
4  
5  
6  
7  
8  
9  
10  
11  
12  
13  
14  
15  
16  
17  
18  
19  
20  
21  
22  
23  
24  
25  
26  
27  
28  
29  
30  
31  
32  
33  
34  
35  
36  
37  
38  
39  
40  
41  
42  
43  
44  
45  
46  
47  
48  
49  
50  
51  
52  
53  
54  
55  
56  
57  
58  
59  
60

For peer review only

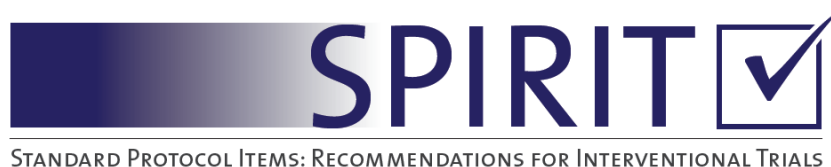

STANDARD PROTOCOL ITEMS: RECOMMENDATIONS FOR INTERVENTIONAL TRIALS

SPIRIT 2013 Checklist: Recommended items to address in a clinical trial protocol and related documents\*

| Section/item                      | Item No | Description                                                                                                                                                                                                                                                                              | Digital Acoustic Surveillance for Respiratory Disease Outbreak Early Detection: An Exploratory Observational Study in Navarra, Spain |
|-----------------------------------|---------|------------------------------------------------------------------------------------------------------------------------------------------------------------------------------------------------------------------------------------------------------------------------------------------|--------------------------------------------------------------------------------------------------------------------------------------|
| <b>Administrative information</b> |         |                                                                                                                                                                                                                                                                                          |                                                                                                                                      |
| Title                             | 1       | Descriptive title identifying the study design, population, interventions, and, if applicable, trial acronym                                                                                                                                                                             | ✓                                                                                                                                    |
| Trial registration                | 2a      | Trial identifier and registry name. If not yet registered, name of intended registry                                                                                                                                                                                                     | p. 3                                                                                                                                 |
|                                   | 2b      | All items from the World Health Organization Trial Registration Data Set                                                                                                                                                                                                                 | NA                                                                                                                                   |
| Protocol version                  | 3       | Date and version identifier                                                                                                                                                                                                                                                              | NA                                                                                                                                   |
| Funding                           | 4       | Sources and types of financial, material, and other support                                                                                                                                                                                                                              | p. 19                                                                                                                                |
| Roles and responsibilities        | 5a      | Names, affiliations, and roles of protocol contributors                                                                                                                                                                                                                                  | p. 0                                                                                                                                 |
|                                   | 5b      | Name and contact information for the trial sponsor                                                                                                                                                                                                                                       | p. 0                                                                                                                                 |
|                                   | 5c      | Role of study sponsor and funders, if any, in study design; collection, management, analysis, and interpretation of data; writing of the report; and the decision to submit the report for publication, including whether they will have ultimate authority over any of these activities | p. 19                                                                                                                                |
|                                   | 5d      | Composition, roles, and responsibilities of the coordinating centre, steering committee, endpoint adjudication committee, data management team, and other individuals or groups overseeing the trial, if applicable (see Item 21a for data monitoring committee)                         | NA                                                                                                                                   |
| <b>Introduction</b>               |         |                                                                                                                                                                                                                                                                                          |                                                                                                                                      |
| Background and rationale          | 6a      | Description of research question and justification for undertaking the trial, including summary of relevant studies (published and unpublished) examining benefits and harms for each intervention                                                                                       | p.5-6                                                                                                                                |
|                                   | 6b      | Explanation for choice of comparators                                                                                                                                                                                                                                                    | NA                                                                                                                                   |
| Objectives                        | 7       | Specific objectives or hypotheses                                                                                                                                                                                                                                                        | p. 8                                                                                                                                 |
| Trial design                      | 8       | Description of trial design including type of trial (eg, parallel group, crossover, factorial, single group), allocation ratio, and framework (eg, superiority, equivalence, noninferiority, exploratory)                                                                                | p.6-7                                                                                                                                |

**Methods: Participants, interventions, and outcomes**

|                      |     |                                                                                                                                                                                                                                                                                                                                                                                |                  |
|----------------------|-----|--------------------------------------------------------------------------------------------------------------------------------------------------------------------------------------------------------------------------------------------------------------------------------------------------------------------------------------------------------------------------------|------------------|
| Study setting        | 9   | Description of study settings (eg, community clinic, academic hospital) and list of countries where data will be collected. Reference to where list of study sites can be obtained                                                                                                                                                                                             | p. 6             |
| Eligibility criteria | 10  | Inclusion and exclusion criteria for participants. If applicable, eligibility criteria for study centres and individuals who will perform the interventions (eg, surgeons, psychotherapists)                                                                                                                                                                                   | p. 8             |
| Interventions        | 11a | Interventions for each group with sufficient detail to allow replication, including how and when they will be administered                                                                                                                                                                                                                                                     | p.9-10,11        |
|                      | 11b | Criteria for discontinuing or modifying allocated interventions for a given trial participant (eg, drug dose change in response to harms, participant request, or improving/worsening disease)                                                                                                                                                                                 | NA               |
|                      | 11c | Strategies to improve adherence to intervention protocols, and any procedures for monitoring adherence (eg, drug tablet return, laboratory tests)                                                                                                                                                                                                                              | p. 9             |
|                      | 11d | Relevant concomitant care and interventions that are permitted or prohibited during the trial                                                                                                                                                                                                                                                                                  | NA               |
| Outcomes             | 12  | Primary, secondary, and other outcomes, including the specific measurement variable (eg, systolic blood pressure), analysis metric (eg, change from baseline, final value, time to event), method of aggregation (eg, median, proportion), and time point for each outcome. Explanation of the clinical relevance of chosen efficacy and harm outcomes is strongly recommended | p. 12-15         |
| Participant timeline | 13  | Time schedule of enrolment, interventions (including any run-ins and washouts), assessments, and visits for participants. A schematic diagram is highly recommended (see Figure)                                                                                                                                                                                               | p. 7-8, Figure 1 |
| Sample size          | 14  | Estimated number of participants needed to achieve study objectives and how it was determined, including clinical and statistical assumptions supporting any sample size calculations                                                                                                                                                                                          | p. 12            |
| Recruitment          | 15  | Strategies for achieving adequate participant enrolment to reach target sample size                                                                                                                                                                                                                                                                                            | p. 7             |

**Methods: Assignment of interventions (for controlled trials)**

## Allocation:

|                     |     |                                                                                                                                                                                                                                                                                                                                                          |    |
|---------------------|-----|----------------------------------------------------------------------------------------------------------------------------------------------------------------------------------------------------------------------------------------------------------------------------------------------------------------------------------------------------------|----|
| Sequence generation | 16a | Method of generating the allocation sequence (eg, computer-generated random numbers), and list of any factors for stratification. To reduce predictability of a random sequence, details of any planned restriction (eg, blocking) should be provided in a separate document that is unavailable to those who enrol participants or assign interventions | NA |
|---------------------|-----|----------------------------------------------------------------------------------------------------------------------------------------------------------------------------------------------------------------------------------------------------------------------------------------------------------------------------------------------------------|----|

|    |                |     |                                                                         |
|----|----------------|-----|-------------------------------------------------------------------------|
| 1  |                |     |                                                                         |
| 2  | Allocation     | 16b | Mechanism of implementing the allocation sequence (eg, central          |
| 3  | concealment    |     | telephone; sequentially numbered, opaque, sealed envelopes),            |
| 4  | mechanism      |     | describing any steps to conceal the sequence until interventions are    |
| 5  |                |     | assigned NA                                                             |
| 6  |                |     |                                                                         |
| 7  | Implementation | 16c | Who will generate the allocation sequence, who will enrol participants, |
| 8  |                |     | and who will assign participants to interventions p. 7                  |
| 9  |                |     |                                                                         |
| 10 | Blinding       | 17a | Who will be blinded after assignment to interventions (eg, trial        |
| 11 | (masking)      |     | participants, care providers, outcome assessors, data analysts), and    |
| 12 |                |     | how NA                                                                  |
| 13 |                |     |                                                                         |
| 14 |                |     |                                                                         |
| 15 |                | 17b | If blinded, circumstances under which unblinding is permissible, and    |
| 16 |                |     | procedure for revealing a participant's allocated intervention during   |
| 17 |                |     | the trial NA                                                            |
| 18 |                |     |                                                                         |
| 19 |                |     |                                                                         |

### Methods: Data collection, management, and analysis

|    |                 |     |                                                                          |
|----|-----------------|-----|--------------------------------------------------------------------------|
| 20 |                 |     |                                                                          |
| 21 | Data collection | 18a | Plans for assessment and collection of outcome, baseline, and other      |
| 22 | methods         |     | trial data, including any related processes to promote data quality (eg, |
| 23 |                 |     | duplicate measurements, training of assessors) and a description of      |
| 24 |                 |     | study instruments (eg, questionnaires, laboratory tests) along with      |
| 25 |                 |     | their reliability and validity, if known. Reference to where data        |
| 26 |                 |     | collection forms can be found, if not in the protocol p. 7, 12-15.       |
| 27 |                 |     |                                                                          |
| 28 |                 |     |                                                                          |
| 29 |                 |     |                                                                          |
| 30 |                 | 18b | Plans to promote participant retention and complete follow-up,           |
| 31 |                 |     | including list of any outcome data to be collected for participants who  |
| 32 |                 |     | discontinue or deviate from intervention protocols p. 9                  |
| 33 |                 |     |                                                                          |
| 34 | Data            | 19  | Plans for data entry, coding, security, and storage, including any       |
| 35 | management      |     | related processes to promote data quality (eg, double data entry;        |
| 36 |                 |     | range checks for data values). Reference to where details of data        |
| 37 |                 |     | management procedures can be found, if not in the protocol p.15-16       |
| 38 |                 |     |                                                                          |
| 39 |                 |     |                                                                          |
| 40 | Statistical     | 20a | Statistical methods for analysing primary and secondary outcomes.        |
| 41 | methods         |     | Reference to where other details of the statistical analysis plan can be |
| 42 |                 |     | found, if not in the protocol p. 12-15                                   |
| 43 |                 |     |                                                                          |
| 44 |                 |     |                                                                          |
| 45 |                 | 20b | Methods for any additional analyses (eg, subgroup and adjusted           |
| 46 |                 |     | analyses) p. 15                                                          |
| 47 |                 |     |                                                                          |
| 48 |                 | 20c | Definition of analysis population relating to protocol non-adherence     |
| 49 |                 |     | (eg, as randomised analysis), and any statistical methods to handle      |
| 50 |                 |     | missing data (eg, multiple imputation) NA                                |
| 51 |                 |     |                                                                          |

### Methods: Monitoring

|    |                 |     |                                                                      |
|----|-----------------|-----|----------------------------------------------------------------------|
| 52 |                 |     |                                                                      |
| 53 |                 |     |                                                                      |
| 54 | Data monitoring | 21a | Composition of data monitoring committee (DMC); summary of its role  |
| 55 |                 |     | and reporting structure; statement of whether it is independent from |
| 56 |                 |     | the sponsor and competing interests; and reference to where further  |
| 57 |                 |     | details about its charter can be found, if not in the protocol.      |
| 58 |                 |     | Alternatively, an explanation of why a DMC is not needed NA          |
| 59 |                 |     |                                                                      |
| 60 |                 |     |                                                                      |

|    |                                 |     |                                                                                                                                                                                                                                                                                     |                                                                                              |
|----|---------------------------------|-----|-------------------------------------------------------------------------------------------------------------------------------------------------------------------------------------------------------------------------------------------------------------------------------------|----------------------------------------------------------------------------------------------|
| 1  |                                 | 21b | Description of any interim analyses and stopping guidelines, including who will have access to these interim results and make the final decision to terminate the trial                                                                                                             | NA                                                                                           |
| 2  |                                 |     |                                                                                                                                                                                                                                                                                     |                                                                                              |
| 3  |                                 |     |                                                                                                                                                                                                                                                                                     |                                                                                              |
| 4  |                                 |     |                                                                                                                                                                                                                                                                                     |                                                                                              |
| 5  |                                 |     |                                                                                                                                                                                                                                                                                     |                                                                                              |
| 6  | Harms                           | 22  | Plans for collecting, assessing, reporting, and managing solicited and spontaneously reported adverse events and other unintended effects of trial interventions or trial conduct                                                                                                   | p. 15                                                                                        |
| 7  |                                 |     |                                                                                                                                                                                                                                                                                     |                                                                                              |
| 8  |                                 |     |                                                                                                                                                                                                                                                                                     |                                                                                              |
| 9  |                                 |     |                                                                                                                                                                                                                                                                                     |                                                                                              |
| 10 | Auditing                        | 23  | Frequency and procedures for auditing trial conduct, if any, and whether the process will be independent from investigators and the sponsor                                                                                                                                         | NA                                                                                           |
| 11 |                                 |     |                                                                                                                                                                                                                                                                                     |                                                                                              |
| 12 |                                 |     |                                                                                                                                                                                                                                                                                     |                                                                                              |
| 13 |                                 |     |                                                                                                                                                                                                                                                                                     |                                                                                              |
| 14 |                                 |     |                                                                                                                                                                                                                                                                                     |                                                                                              |
| 15 | <b>Ethics and dissemination</b> |     |                                                                                                                                                                                                                                                                                     |                                                                                              |
| 16 |                                 |     |                                                                                                                                                                                                                                                                                     |                                                                                              |
| 17 | Research ethics approval        | 24  | Plans for seeking research ethics committee/institutional review board (REC/IRB) approval                                                                                                                                                                                           | p. 16                                                                                        |
| 18 |                                 |     |                                                                                                                                                                                                                                                                                     |                                                                                              |
| 19 |                                 |     |                                                                                                                                                                                                                                                                                     |                                                                                              |
| 20 | Protocol amendments             | 25  | Plans for communicating important protocol modifications (eg, changes to eligibility criteria, outcomes, analyses) to relevant parties (eg, investigators, REC/IRBs, trial participants, trial registries, journals, regulators)                                                    | p. 16                                                                                        |
| 21 |                                 |     |                                                                                                                                                                                                                                                                                     |                                                                                              |
| 22 |                                 |     |                                                                                                                                                                                                                                                                                     |                                                                                              |
| 23 |                                 |     |                                                                                                                                                                                                                                                                                     |                                                                                              |
| 24 |                                 |     |                                                                                                                                                                                                                                                                                     |                                                                                              |
| 25 |                                 |     |                                                                                                                                                                                                                                                                                     |                                                                                              |
| 26 | Consent or assent               | 26a | Who will obtain informed consent or assent from potential trial participants or authorised surrogates, and how (see Item 32)                                                                                                                                                        | p. 7                                                                                         |
| 27 |                                 |     |                                                                                                                                                                                                                                                                                     |                                                                                              |
| 28 |                                 |     |                                                                                                                                                                                                                                                                                     |                                                                                              |
| 29 |                                 | 26b | Additional consent provisions for collection and use of participant data and biological specimens in ancillary studies, if applicable                                                                                                                                               | NA                                                                                           |
| 30 |                                 |     |                                                                                                                                                                                                                                                                                     |                                                                                              |
| 31 |                                 |     |                                                                                                                                                                                                                                                                                     |                                                                                              |
| 32 | Confidentiality                 | 27  | How personal information about potential and enrolled participants will be collected, shared, and maintained in order to protect confidentiality before, during, and after the trial                                                                                                | p. 15-16                                                                                     |
| 33 |                                 |     |                                                                                                                                                                                                                                                                                     |                                                                                              |
| 34 |                                 |     |                                                                                                                                                                                                                                                                                     |                                                                                              |
| 35 |                                 |     |                                                                                                                                                                                                                                                                                     |                                                                                              |
| 36 |                                 |     |                                                                                                                                                                                                                                                                                     |                                                                                              |
| 37 | Declaration of interests        | 28  | Financial and other competing interests for principal investigators for the overall trial and each study site                                                                                                                                                                       | p. 19                                                                                        |
| 38 |                                 |     |                                                                                                                                                                                                                                                                                     |                                                                                              |
| 39 |                                 |     |                                                                                                                                                                                                                                                                                     |                                                                                              |
| 40 | Access to data                  | 29  | Statement of who will have access to the final trial dataset, and disclosure of contractual agreements that limit such access for investigators                                                                                                                                     | Data share agreement included in the research agreement, but not included in the submission. |
| 41 |                                 |     |                                                                                                                                                                                                                                                                                     |                                                                                              |
| 42 |                                 |     |                                                                                                                                                                                                                                                                                     |                                                                                              |
| 43 |                                 |     |                                                                                                                                                                                                                                                                                     |                                                                                              |
| 44 |                                 |     |                                                                                                                                                                                                                                                                                     |                                                                                              |
| 45 | Ancillary and post-trial care   | 30  | Provisions, if any, for ancillary and post-trial care, and for compensation to those who suffer harm from trial participation                                                                                                                                                       | NA                                                                                           |
| 46 |                                 |     |                                                                                                                                                                                                                                                                                     |                                                                                              |
| 47 |                                 |     |                                                                                                                                                                                                                                                                                     |                                                                                              |
| 48 | Dissemination policy            | 31a | Plans for investigators and sponsor to communicate trial results to participants, healthcare professionals, the public, and other relevant groups (eg, via publication, reporting in results databases, or other data sharing arrangements), including any publication restrictions | p. 16                                                                                        |
| 49 |                                 |     |                                                                                                                                                                                                                                                                                     |                                                                                              |
| 50 |                                 |     |                                                                                                                                                                                                                                                                                     |                                                                                              |
| 51 |                                 |     |                                                                                                                                                                                                                                                                                     |                                                                                              |
| 52 |                                 |     |                                                                                                                                                                                                                                                                                     |                                                                                              |
| 53 |                                 |     |                                                                                                                                                                                                                                                                                     |                                                                                              |
| 54 |                                 | 31b | Authorship eligibility guidelines and any intended use of professional writers                                                                                                                                                                                                      | p. 19                                                                                        |
| 55 |                                 |     |                                                                                                                                                                                                                                                                                     |                                                                                              |
| 56 |                                 |     |                                                                                                                                                                                                                                                                                     |                                                                                              |
| 57 |                                 | 31c | Plans, if any, for granting public access to the full protocol, participant-level dataset, and statistical code                                                                                                                                                                     | NA                                                                                           |
| 58 |                                 |     |                                                                                                                                                                                                                                                                                     |                                                                                              |
| 59 |                                 |     |                                                                                                                                                                                                                                                                                     |                                                                                              |
| 60 |                                 |     |                                                                                                                                                                                                                                                                                     |                                                                                              |

## Appendices

|                            |    |                                                                                                                                                                                                |     |
|----------------------------|----|------------------------------------------------------------------------------------------------------------------------------------------------------------------------------------------------|-----|
| Informed consent materials | 32 | Model consent form and other related documentation given to participants and authorised surrogates                                                                                             | Yes |
| Biological specimens       | 33 | Plans for collection, laboratory evaluation, and storage of biological specimens for genetic or molecular analysis in the current trial and for future use in ancillary studies, if applicable | NA  |

---

\*It is strongly recommended that this checklist be read in conjunction with the SPIRIT 2013 Explanation & Elaboration for important clarification on the items. Amendments to the protocol should be tracked and dated. The SPIRIT checklist is copyrighted by the SPIRIT Group under the Creative Commons "[Attribution-NonCommercial-NoDerivs 3.0 Unported](#)" license.

For peer review only

# BMJ Open

## Digital Acoustic Surveillance for Early Detection of Respiratory Disease Outbreaks in Spain: A protocol for an observational study

|                                 |                                                                                                                                                                                                                                                                                                                                                                                                                                                                                                                                                                                                                                                                                                                                                                                                                                                                                                                                                                                                                                                                                                                      |
|---------------------------------|----------------------------------------------------------------------------------------------------------------------------------------------------------------------------------------------------------------------------------------------------------------------------------------------------------------------------------------------------------------------------------------------------------------------------------------------------------------------------------------------------------------------------------------------------------------------------------------------------------------------------------------------------------------------------------------------------------------------------------------------------------------------------------------------------------------------------------------------------------------------------------------------------------------------------------------------------------------------------------------------------------------------------------------------------------------------------------------------------------------------|
| Journal:                        | <i>BMJ Open</i>                                                                                                                                                                                                                                                                                                                                                                                                                                                                                                                                                                                                                                                                                                                                                                                                                                                                                                                                                                                                                                                                                                      |
| Manuscript ID                   | bmjopen-2021-051278.R1                                                                                                                                                                                                                                                                                                                                                                                                                                                                                                                                                                                                                                                                                                                                                                                                                                                                                                                                                                                                                                                                                               |
| Article Type:                   | Protocol                                                                                                                                                                                                                                                                                                                                                                                                                                                                                                                                                                                                                                                                                                                                                                                                                                                                                                                                                                                                                                                                                                             |
| Date Submitted by the Author:   | 27-May-2021                                                                                                                                                                                                                                                                                                                                                                                                                                                                                                                                                                                                                                                                                                                                                                                                                                                                                                                                                                                                                                                                                                          |
| Complete List of Authors:       | Gabaldon-Figueira, Juan; Clínica Universidad de Navarra, Area de Enfermedades Infecciosas<br>Brew, Joe; Hyfe Inc<br>Doré, Dominique; Centre de Recherche du Centre Hospitalier de l'Université de Montréal, Immunopathology Axis<br>Umashankar, Nita; San Diego State University<br>Chaccour, Juliane ; Clínica Universidad de Navarra, Área de Enfermedades Infecciosas<br>Orrillo, Virginia; University of Navarra, School of Pharmacy and Nutrition<br>Tsang, Lai Yu; Stony Brook University, Global Health Institute<br>Blavia, Isabel; University of Navarra, School of Pharmacy and Nutrition<br>Fernández-Montero , Alejandro ; Clínica Universidad de Navarra<br>Bartolomé, Javier; Servicio Navarro de Salud - Osasunbidea<br>Grandjean Lapierre, Simon; Centre de Recherche du Centre Hospitalier de l'Université de Montréal, Immunopathology Axis; Centre de Recherche du Centre Hospitalier de l'Université de Montréal, Department of Microbiology, Infectious Diseases and Immunology<br>Chaccour, C; Universitat de Barcelona, ISGlobal; Clínica Universidad de Navarra, Area of Infectious Diseases |
| <b>Primary Subject Heading</b>: | Respiratory medicine                                                                                                                                                                                                                                                                                                                                                                                                                                                                                                                                                                                                                                                                                                                                                                                                                                                                                                                                                                                                                                                                                                 |
| Secondary Subject Heading:      | Respiratory medicine                                                                                                                                                                                                                                                                                                                                                                                                                                                                                                                                                                                                                                                                                                                                                                                                                                                                                                                                                                                                                                                                                                 |
| Keywords:                       | COVID-19, Respiratory infections < THORACIC MEDICINE, Epidemiology < TROPICAL MEDICINE                                                                                                                                                                                                                                                                                                                                                                                                                                                                                                                                                                                                                                                                                                                                                                                                                                                                                                                                                                                                                               |
|                                 |                                                                                                                                                                                                                                                                                                                                                                                                                                                                                                                                                                                                                                                                                                                                                                                                                                                                                                                                                                                                                                                                                                                      |

SCHOLARONE™  
Manuscripts



I, the Submitting Author has the right to grant and does grant on behalf of all authors of the Work (as defined in the below author licence), an exclusive licence and/or a non-exclusive licence for contributions from authors who are: i) UK Crown employees; ii) where BMJ has agreed a CC-BY licence shall apply, and/or iii) in accordance with the terms applicable for US Federal Government officers or employees acting as part of their official duties; on a worldwide, perpetual, irrevocable, royalty-free basis to BMJ Publishing Group Ltd ("BMJ") its licensees and where the relevant Journal is co-owned by BMJ to the co-owners of the Journal, to publish the Work in this journal and any other BMJ products and to exploit all rights, as set out in our [licence](#).

The Submitting Author accepts and understands that any supply made under these terms is made by BMJ to the Submitting Author unless you are acting as an employee on behalf of your employer or a postgraduate student of an affiliated institution which is paying any applicable article publishing charge ("APC") for Open Access articles. Where the Submitting Author wishes to make the Work available on an Open Access basis (and intends to pay the relevant APC), the terms of reuse of such Open Access shall be governed by a Creative Commons licence – details of these licences and which [Creative Commons](#) licence will apply to this Work are set out in our licence referred to above.

Other than as permitted in any relevant BMJ Author's Self Archiving Policies, I confirm this Work has not been accepted for publication elsewhere, is not being considered for publication elsewhere and does not duplicate material already published. I confirm all authors consent to publication of this Work and authorise the granting of this licence.



1 **Digital Acoustic Surveillance for Early Detection of Respiratory Disease Outbreaks in Spain:**  
2 **A protocol for an observational study**

3  
4 Juan C. Gabaldón-Figueira<sup>a\*</sup> [[jgabaldonfi@unav.es](mailto:jgabaldonfi@unav.es)](ORCID: 0000-0002-2525-0263)

5 Joe Brew<sup>b</sup> [[joe@hyfe.ai](mailto:joe@hyfe.ai)] (ORCID: 0000-0002-4119-0117)

6 Dominique Hélène Doré<sup>c</sup> [[dominique.helene.dore@umontreal.ca](mailto:dominique.helene.dore@umontreal.ca)]

7 Nita Umashankar<sup>d</sup> [[numashankar@sdsu.edu](mailto:numashankar@sdsu.edu)]

8 Juliane Chaccour<sup>a</sup> [[jchaccour@gmail.com](mailto:jchaccour@gmail.com)] (ORCID: 0000-0001-5611-9690)

9 Virginia Orrillo<sup>e</sup> [[vorrillo@alumni.unav.es](mailto:vorrillo@alumni.unav.es)]

10 Lai Yu Tsang<sup>f</sup> [[Lai.Tsang@stonybrookmedicine.edu](mailto:Lai.Tsang@stonybrookmedicine.edu)]

11 Isabel Blavia<sup>e</sup> [[iblavia@alumni.unav.es](mailto:iblavia@alumni.unav.es)]

12 Alejandro Fernandez-Montero<sup>a</sup> [[afmontero@unav.es](mailto:afmontero@unav.es)]

13 Javier Bartolomé<sup>g</sup> [[fjbr@medena.es](mailto:fjbr@medena.es)]

14 Simon Grandjean Lapierre<sup>c,i †</sup>

15 [[simon.grandjean.lapierre@umontreal.ca](mailto:simon.grandjean.lapierre@umontreal.ca)] (ORCID 0000-0003-3646-1573)

16 Carlos Chaccour<sup>h, a, j †</sup> [[carlos.chaccour@isglobal.org](mailto:carlos.chaccour@isglobal.org)] (ORCID 0000-0001-9812-050X)

17  
18 \*Corresponding author

19 †These authors contributed equally

20 **Corresponding author's contact information**

21 Juan C. Gabaldón-Figueira

22 E: [jgabaldonfi@unav.es](mailto:jgabaldonfi@unav.es)

23 Address: Av. Pío XII, 36, Pamplona, Navarra, Spain. 31008.

24  
25 **Affiliations**

26 <sup>a</sup> Clínica Universidad de Navarra, University of Navarra, Pamplona, Spain

- 1  
2  
3 27 <sup>b</sup> Hyfe Inc, Wilmington, DE, USA  
4  
5 28 <sup>c</sup> Immunopathology Axis, Centre de Recherche du Centre Hospitalier de l'Université de  
6  
7 29 Montréal, Montréal, Québec, Canada  
8  
9 30 <sup>d</sup> San Diego State University, San Diego, CA, USA  
10  
11 31 <sup>e</sup> School of Pharmacy and Nutrition, University of Navarra, Pamplona, Spain  
12  
13 32 <sup>f</sup> Stony Brook University, Global Health Institute, Stony Brook, New York, USA  
14  
15 33 <sup>g</sup> Servicio Navarro de Salud- Osasunbidea, Zizur Mayor, Spain  
16  
17 34 <sup>h</sup> ISGlobal, Hospital Clínic - Universitat de Barcelona, Barcelona, Spain  
18  
19 35 <sup>i</sup> Department of Microbiology, Infectious Diseases and Immunology, Université de Montréal,  
20  
21 36 Montréal, Québec, Canada  
22  
23 37 <sup>j</sup> Ifakara Health Institute, United Republic of Tanzania.  
24  
25  
26  
27  
28 38  
29  
30 39 **Word count: 3471**  
31  
32  
33  
34  
35  
36  
37  
38  
39  
40  
41  
42  
43  
44  
45  
46  
47  
48  
49  
50  
51  
52  
53  
54  
55  
56  
57  
58  
59  
60

1  
2  
3 **40 Abstract**

4  
5 **41 Introduction**

6  
7  
8 Cough is a common symptom of COVID-19 and other respiratory illnesses. However,  
9  
10  
11  
12 objectively measuring its frequency and evolution is hindered by the lack of reliable and  
13  
14  
15 scalable monitoring systems. This can be overcome by newly developed artificial intelligence  
16  
17  
18 models that exploit the portability of smartphones. In the context of the ongoing COVID-19  
19  
20  
21 pandemic, cough detection for respiratory disease syndromic surveillance represents a simple  
22  
23  
24 means for early outbreak detection and disease surveillance. In this protocol, we evaluate the  
25  
26  
27 ability of population-based digital cough surveillance to predict the incidence of respiratory  
28  
29  
30 diseases at population level in Navarra, Spain, while assessing individual determinants of  
31  
32  
33 uptake of these platforms.  
34  
35  
36

37  
38 **51 Methods and analysis**

39  
40  
41 Participants in the Cendea de Cizur, Zizur Mayor, or attending the local University of Navarra  
42  
43  
44 (Pamplona) will be invited to monitor their night-time cough using the smartphone app Hyfe  
45  
46  
47 Cough Tracker™. Detected coughs will be aggregated in time and space. Incidence of  
48  
49  
50 COVID-19, and other diagnosed respiratory diseases within the participants cohort, and the  
51  
52  
53 study area and population will be collected from local health facilities and used to carry out  
54  
55  
56 an ARIMA analysis on those independent time series. In a mixed-methods design, we will  
57  
58  
59 explore barriers and facilitators of continuous digital cough monitoring by evaluating  
60  
61  
62 participation patterns, socio demographic characteristics. Participants will fill an  
63  
64  
65 acceptability questionnaire and a subgroup will participate in focus group discussions.  
66

67  
68 **61 Ethics and dissemination**

69  
70  
71 Ethics approval was obtained from the ethics committee of the Centre Hospitalier de  
72  
73  
74 l'Université de Montréal, Canada and the Medical Research Ethics Committee of Navarre,  
75  
76  
77 Spain. Preliminary findings will be shared with civil and health authorities and reported to  
78  
79  
80

1  
2  
3  
4  
5  
6  
7  
8  
9  
10  
11  
12  
13  
14  
15  
16  
17  
18  
19  
20  
21  
22  
23  
24  
25  
26  
27  
28  
29  
30  
31  
32  
33  
34  
35  
36  
37  
38  
39  
40  
41  
42  
43  
44  
45  
46  
47  
48  
49  
50  
51  
52  
53  
54  
55  
56  
57  
58  
59  
60

65 individual participants. Results will be submitted for publication in peer-reviewed scientific  
66 journals and international conferences.

67 **Trial Registration Number**

68 [clinicaltrials.gov/NCT04762693](http://clinicaltrials.gov/NCT04762693)

69  
70  
71  
72  
73  
74  
75  
76  
77  
78  
79  
80  
81  
82  
83  
84  
85  
86  
87  
88  
89  
90

For peer review only

1  
2  
3 91 **Strengths and limitations of this study**  
4

5 92 1. This is the first study to evaluate the utility of artificial intelligence models and  
6  
7 93 smartphone applications for cough detection at population level.

8  
9  
10 94 2. The studied approach has the potential to be rapidly scalable even within  
11  
12 95 underdeveloped public health systems.

13  
14 96 3. Qualitative methods will improve the understanding of barriers and facilitators  
15  
16 97 affecting the uptake of cough detection smartphone applications and participation in acoustic  
17  
18 98 surveillance programs.

19  
20  
21 99 4. Recorded coughs will be annotated with clinical diagnoses (when available) and will  
22  
23 100 contribute to the training of cough-based disease-specific screening and diagnostic tools.

24  
25 101 5. Success of this study is contingent on large-scale enrolment and high participant  
26  
27 102 retention since a small sample size might not be sufficient to appropriately correlate the study  
28  
29 103 population's cough trends and their relationship with the incidence of respiratory diseases at  
30  
31 104 population level.  
32  
33  
34  
35  
36  
37  
38  
39  
40  
41  
42  
43  
44  
45  
46  
47  
48  
49  
50  
51  
52  
53  
54  
55  
56  
57  
58  
59  
60

## 105 **Introduction**

106 Real-time tracking of the COVID-19 pandemic and detection of the emergence of novel  
107 variants or other respiratory pathogens represent challenges for public health authorities  
108 globally. Nonetheless, understanding local epidemiology is essential to disease control efforts.

109 This is particularly true now that the world has moved into a COVID-19 endemic phase, with  
110 periodic outbreaks in multiple locations superimposed over ongoing community transmission.

111 The ability to appropriately monitor disease incidence, however, is frequently limited by a lack  
112 of testing capacity, delays in health-seeking behaviours, as well as complexities related to  
113 timely aggregation of actionable surveillance data by public health authorities.

114 Although asymptomatic cases of COVID-19 and other respiratory communicable diseases are  
115 well described, cough remains a common symptom of COVID- 19 (1, 2). A meta-analysis  
116 including data from over 24,000 adults with confirmed COVID-19 revealed cough as the  
117 second most prevalent symptom, being reported by 57% (CI: 54-60%) of all patients. (3)  
118 Additionally, cough is a key event in the transmission of COVID-19 and other respiratory  
119 pathogens.(4)

120 Given the intrinsic subjectivity of existing cough monitoring tools, mostly based in self-  
121 reported questionnaires, there is a great interest in developing an automated system to  
122 objectively register coughs. Attempts to achieve this date back to the 1950s, but until recently,  
123 important technologic constraints limited significant advances. (5)

124 Even now, detecting and classifying sounds as coughs without the input of a human observer,  
125 still represents a remarkable challenge. However, automatically detecting cough is now  
126 possible thanks to the development of acoustics and artificial intelligence (AI) models which  
127 can be incorporated into wearable devices. This has allowed the development of several  
128 alternatives, whose widespread deployment beyond a research context remains limited due  
129 to problems related to portability, the need to continuously record sound (which may

1  
2  
3 130 compromise patients' privacy), inconsistent sensitivity and specificity, high false positivity  
4  
5 131 rates, and little financial incentives.(5)  
6

7  
8 132

9  
10 133 Some of these limitations might be addressed by incorporating similar systems on smartphone  
11  
12 134 applications, an approach that has just recently begun to be widely explored.(6, 7) In brief,  
13  
14 135 putative cough sounds (manifested as short and explosive noises) are recognized and  
15  
16 136 captured by smartphones. Machine learning models trained on hundreds of thousands of  
17  
18 137 annotated sounds are then used to distinguish cough from other sounds.

19  
20  
21 138 We propose that COVID-19 surveillance and early outbreak recognition can be enhanced by  
22  
23 139 digitally monitoring cough and detecting changes in its incidence at population level. We  
24  
25 140 hypothesize such changes precede individual symptoms recognition, healthcare seeking  
26  
27 141 behaviours, diagnosis, and data aggregation within conventional disease surveillance systems.  
28  
29 142 Indeed, digital cough monitoring data can be aggregated in real time providing constantly  
30  
31 143 updated information on the emergence and activity of communicable respiratory diseases  
32  
33 144 within populations. This approach would be of particular value in low- and middle-income  
34  
35 145 countries where (a) capturing passive data through health services is insufficient given  
36  
37 146 unequal access to healthcare, and (b) active case detection and contact tracing capacity is  
38  
39 147 limited. (8, 9)  
40  
41  
42

43 148 To our knowledge, digital cough monitoring for early detection of respiratory disease  
44  
45 149 outbreaks has never been performed. Provided the participation of a critical mass of active  
46  
47 150 users is achieved, monitoring of aggregated cough data could provide a simple and  
48  
49 151 inexpensive surrogate indicator for overall respiratory infections incidence, similar to, but  
50  
51 152 more accurate than wastewater monitoring (10). This information could in turn guide public  
52  
53 153 health interventions. If proven successful in the specific case of COVID-19, this study would  
54  
55 154 establish a template for early and disease-agnostic detection of emerging pathogens,  
56  
57 155 therefore contributing to health systems epidemic preparedness.  
58  
59  
60

1  
2  
3 156 **Primary research question**  
4

5 157 Can digital cough surveillance predict the incidence of respiratory diseases at population-level  
6  
7 158 in Navarra, Spain?  
8  
9

10 159

11  
12 160 **Methods**  
13

14 161 **Study design**  
15

16 162 This is a prospective observational study which will take place between November 2020 and  
17  
18 163 October 2021 (Figure 1). Participants will be recruited in (a) the Cendea de Cizur, a  
19  
20 164 municipality composed by a cluster of villages south of the city of Pamplona, (b) the  
21  
22 165 neighbouring town of Zizur Mayor, in the Chartered Community of Navarra (Spain), as well as  
23  
24 166 (c) in the different campuses of the University of Navarra (Pamplona), which collides with the  
25  
26 167 municipalities.  
27  
28

29  
30 168 All these communities are located within a 5 km range from each other, and there is a  
31  
32 169 considerable geographical and social overlap between them, as the University of Navarra is  
33  
34 170 the second most important employer in the area.  
35

36 171 The 4,000 people living in the Cendea de Cizur are served by a public health center which  
37  
38 172 receives 45,000 outpatients visits per year. Of these, approximately 12% are associated with  
39  
40 173 respiratory diseases. Furthermore, the Clínica Universidad de Navarra is the main private  
41  
42 174 healthcare provider in the region and offers medical care to a significant proportion of the  
43  
44 175 population, as well as university students and workers. Both centres offer COVID-19 PCR  
45  
46 176 testing. Together, those two healthcare facilities cover most of the population's healthcare  
47  
48 177 needs and have digitalized medical record systems that facilitate the retrieval of medical data  
49  
50 178 concerning the diagnosis of respiratory diseases among participants.  
51  
52

53  
54 179 Recruitment strategies will include direct solicitation, community meetings, videos and  
55  
56 180 advertisements in social media and university communication platforms. Those willing to  
57  
58 181 participate will attend individual sessions with a study coordinator for counselling and training  
59  
60



182 using the Hyfe Cough Tracker™ (Hyfe™) application, and for obtention of informed consent.  
183 Information consent forms for adults and minors are available as supplementary material 1,  
184 and supplementary material 2, respectively. Participants will consent to be contacted  
185 regularly via email and telephone by the study team and will also fill an enrolment  
186 questionnaire (Supplementary material 3) where demographic and respiratory diseases  
187 medical data will be collected.

188

189 **Primary objective**

190 1. To assess the value of digital cough monitoring and acoustic surveillance in predicting  
191 COVID-19 and other respiratory diseases incidence at population level.

192 **Secondary objective**

193 2. To assess barriers and facilitators to participation in an acoustic surveillance program  
194 using a smartphone-based digital cough monitoring application.

195

196 **Eligibility criteria**

197 To be included in the study, participants must (i) be 13 years old or older, (ii) own a  
198 smartphone, (iii) be willing to install and use the Hyfe™ digital cough monitoring application,  
199 (iv) accept and comply with Hyfe™ privacy policy and terms of use, and (v) grant access to  
200 their medical records. To optimize population representativity, participants also need to (vi)  
201 visit the University of Navarra on a regular basis, either as a student, worker, or patient of the  
202 university clinic, or (vii) have a general interest in the study, and (viii) currently reside in  
203 Navarra. These criteria aim at ensuring a large sample size and the availability of needed  
204 medical records while concentrating recruitment in a geographically focused area. Accounting  
205 for differences between smartphone models' capabilities, upon recruitment, participants will  
206 also have to complete a microphone calibration process within the application. This is to make

207 sure their smartphones can accurately detect cough-like sounds. Participants who fail to  
208 complete this process will be excluded from the study.

### 209 **Participant retention**

210 To ensure participants' retention and promote continuous cough recording, we will use videos  
211 posted on social media, as well as emailed to participants, text messages and regular push  
212 notifications sent via the Hyfe™ application on participants' smartphones. Participants will  
213 also receive monthly emails with information regarding the current stage of the study and  
214 high-level preliminary results.

### 216 **Digital cough monitoring**

217 The cough detection application used in this study is Hyfe Cough Tracker™ (Hyfe™).  
218 (<https://www.hyfeapp.com/>). Hyfe™ runs in the background of smartphones operating  
219 systems, listens for and records short snippets (<0.5 seconds) of explosive, putative cough  
220 sounds and then classifies them as cough or non-cough, using a convolutional neural network  
221 model. Cough sounds are automatically matched with time and GPS coordinates which can be  
222 jittered to ensure participants' privacy. Hyfe™ is a research tool that has collected over 5  
223 million putative cough sounds, of which over 1,000,000 have been classified as coughs or not  
224 by a human listener in order to train the AI model.

225 The analytical performance of Hyfe™ for cough detection (referred to whether the application  
226 is sensitive and specific for the classification of recorded sounds as coughs or non-coughs) was  
227 confirmed using this study's preliminary results from a subgroup of participants recruited in  
228 the Cendea de Cizur between November and December 2020.

229 Approximately 500 participants were contacted from an existing mailing list used in a previous  
230 epidemiological study, of these, 57 were enrolled. While participants were initially requested  
231 to keep Hyfe™ running continuously, they were later instructed to restrict their use to at least

1  
2  
3 232 6 hours during night-time, for 30 days, following complaints of increased battery  
4  
5 233 consumption.

6  
7  
8 234 During this period, nearly 700,000 putative cough sounds were registered, of which 119,876  
9  
10 235 were classified by human observers, revealing a sensitivity of 96.34% and a specificity of  
11  
12 236 96.54%, when using a cough-positivity threshold of 0.85 (Figure 2).

13  
14  
15  
16 237 These values, however, must be interpreted carefully, as specificity measured at the explosive  
17  
18 238 sound level does not necessarily provide a full picture of diagnostic accuracy, particularly in  
19  
20 239 loud environments, where the probability of an explosive sound being a cough is lower, and  
21  
22 240 the false positivity rate might be considerably higher. Similarly, sensitivity does not account  
23  
24 241 for non-explosive sounds, that are not captured by the system, and of which a non-zero  
25  
26 242 number might be coughs.

27  
28  
29  
30 243 Upon enrolment, a study coordinator will assist participants in installing the Hyfe™  
31  
32 244 application. Once turned on, it will continuously monitor participants' cough. Participants can  
33  
34 245 turn the application on and off at will but will be instructed to keep it active for at least six  
35  
36 246 hours or while they sleep, every day for a minimum period of 30 days. In an adaptive design  
37  
38 247 aimed at improving retention, participants will have the possibility of extending their  
39  
40 248 participation to a 3-month and 6-month period.

41  
42  
43  
44 249

#### 45 46 250 **Local epidemiology of respiratory disease**

47  
48 251 Digital medical data systems at the Zizur's health center and the Clínica Universidad de  
49  
50 252 Navarra will be reviewed monthly to establish the incidence of the following respiratory, or  
51  
52 253 cough-associated diseases in the participants cohort; COVID-19, influenza, respiratory  
53  
54 254 syncytial virus (RSV), pneumonia, asthma, bronchitis, pharyngitis, chronic cough, chronic  
55  
56 255 obstructive pulmonary disease (COPD), gastro-esophageal reflux disease (GERD), other  
57  
58 256 nonspecific respiratory tract infections. Specifically, for COVID-19, daily incidence figures for

10

1  
2  
3 257 the study area (Cendea de Cizur, Zizur Mayor, and Pamplona), and regional population, will  
4  
5 258 also be obtained from local health authorities. Data will be aggregated and used to build local  
6  
7 259 epidemic curves of respiratory diseases during the study period.  
8  
9

10 260

### 11 261 **Barriers and facilitators to participation**

12 262 A participation cascade informing on the number of solicited, enrolled, and actively recording  
13  
14 263 participants will be tracked in real time throughout the study. The total number of user-hours  
15  
16 264 using Hyfe™ will also be monitored in real time.  
17  
18

19 265 All participants will be asked to fill a satisfaction survey in which they will be asked about the  
20  
21 266 usability of the app, the problems that they ran into, and their likelihood of using the app in  
22  
23 267 the future. We will follow-up with a group of 25 participants who are willing to attend a focus  
24  
25 268 group discussion (FGD) to better understand the barriers and facilitators affecting  
26  
27 269 participation in the cough-surveillance system. The 25 participants will include some of whom  
28  
29 270 deleted the application early on, who stopped using it after a month, and who had low  
30  
31 271 satisfaction scores.  
32  
33  
34  
35

36 272

### 37 273 **Patient and public involvement**

38  
39 274 This study pilots an experimental syndromic surveillance approach at population level. The  
40  
41 275 municipal authorities of the Cendea de Cizur were informed about the nature of the study and  
42  
43 276 provided feedback on the best approach to recruit local participants. Similarly,  
44  
45 277 representatives of the University of Navarra's medical services collaborated on the design of  
46  
47 278 the study protocol including the review of recruitment strategies as well as data collection,  
48  
49 279 aggregation and reporting plans. No anticipated participants were involved in the study  
50  
51 280 design. Study findings are to be reported in both English and Spanish to participants and key  
52  
53 281 stakeholders at individual, municipality, and university levels during the surveillance phase.  
54  
55  
56  
57  
58

59 282  
60

## 283 **Data analysis and sample size calculations**

### 284 **Syndromic surveillance as a surrogate marker of respiratory disease activity**

285 Given the uncertainty around the incidence of the various respiratory diseases including  
286 COVID-19, throughout the study period, it is impossible to establish a target sample size  
287 sufficient to either confirm or confute with statistical significance that cough monitoring at  
288 population level can predict incidence of respiratory diseases. We will endeavour to recruit  
289 the highest number of participants possible in order to achieve the best representation of the  
290 population.

291 First, cough data will be aggregated in time and space to create cough incidence curves and  
292 geospatial heat maps reflecting the frequency and density of cough among the studied  
293 population (Figure 3 and Figure 4). Second, epidemic curves reflecting the incidence of  
294 targeted respiratory illnesses within the participants cohort, and the number of COVID-19  
295 cases diagnosed in the study area and population will be generated with data collected from  
296 the Clínica Universidad de Navarra, and Zizur's health center, as well as aggregated  
297 epidemiological records obtained from regional health authorities, respectively. Coughs per  
298 person-hour and clinical diagnoses data will be superposed in time. Finally, we will carry out  
299 an autoregressive moving average (ARIMA) analysis to compare the incidence of confirmed  
300 and forecasted respiratory diseases (including COVID-19) with the frequency of cough among  
301 study participants, measured as coughs per person-hour. ARIMA analysis is a type of time  
302 series analysis that uses past data to forecast the likely future behaviour of a variable. In brief,  
303 the variable of interest is regressed to its own lagged values, and autoregression and partial  
304 autocorrelation functions are used to model the stochastic nature of a time series. (11)  
305 Comparison and prediction analyses will be performed using epidemic curves from both the  
306 participants cohort and in the entire study area and population.

307

### 308 **Perceptions and willingness to participate in syndromic surveillance**

1  
2  
3 309 Mixed methods will be used to assess individual barriers and facilitators to participation in an  
4  
5 310 acoustic surveillance program. Among all eligible individuals in the Cendea de Cizur, Zizur  
6  
7 311 Mayor and in the University of Navarra who are invited to participate in the study, we will  
8  
9 312 assess how many do install the cough detection application and keep using it through the  
10  
11 313 course of the study. Participants corresponding to specific user profiles based on duration and  
12  
13 314 regularity of cough recording will be identified. We will then descriptively analyze the socio-  
14  
15 315 demographic characteristics, and baseline health conditions of participants belonging to the  
16  
17 316 different user profiles.

18  
19  
20  
21  
22 317 A subsample of participants will be contacted once a month, by telephone or text messaging,  
23  
24 318 to obtain feedback from their experience using the app.

25  
26  
27  
28 319 To assess population uptake of Hyfe™, as well as barriers and facilitators to participation, a  
29  
30 320 convenience subsample of 25 participants will be recruited for focus group discussions.  
31  
32 321 Following similar designs, FGDs will consist of two parts. (12) The first one will be aimed at  
33  
34 322 understanding a participant's awareness of their cough frequency and temporality patterns,  
35  
36 323 as well as the perceived importance of measuring these elements. Questions asked in this part  
37  
38 324 will include (i) How much attention do you pay to your coughs on a daily basis? (ii) How  
39  
40 325 important is it for you to know the number of times you cough per day? (iii) Will keeping track  
41  
42 326 of your coughs help you improve your health? The second one will focus on the participant's  
43  
44 327 experience using Hyfe™, as well as possible recommendations for developers to improve it.  
45  
46  
47 328 This part will include the following general questions: (i) What do you like about the app, (ii)  
48  
49 329 What do you think of this app compared to other health apps, (iii) What doesn't work well,  
50  
51 330 (iv) What keeps you committed (or not) to using the app, (v) What do you think the purpose  
52  
53 331 of the app is, (vi) What advice do you have for the developers?  
54  
55  
56

57 332

58  
59  
60 333 **Risks and privacy**

1  
2  
3 334 Recording sounds implies specific ethical and privacy concerns. These are, however,  
4  
5 335 addressable at different levels. First, sound snippets recorded are too short (<0.5 seconds) to  
6  
7 336 capture conversations or background sound. Participants can withdraw from the study at any  
8  
9 337 time, and the application can be turned off or removed from smartphones freely. Our consent  
10  
11 338 process explicitly describes exactly what is and what is not recorded. The use of pre-generated  
12  
13 339 unique identifiers to install and use the smartphone application ensures that only  
14  
15 340 investigators can link cough data to personal identifiers. Contact information collected from  
16  
17 341 participants will be kept in physical forms stored under lock, and password-protected files at  
18  
19 342 the University of Navarra. Only the principal investigator, study coordinator, and research  
20  
21 343 assistant will have access to this information. Data transferred to other researchers will only  
22  
23 344 include unique identifiers for individual participants, but no other personal information. All  
24  
25 345 acoustic data and metadata collected by the application is stored in encrypted servers  
26  
27 346 physically located in the United States. Data storage and access protocols are compliant with  
28  
29 347 General Data Protection Regulation (GDPR), and only non-identifiable data information is  
30  
31 348 stored by Hyfe.  
32  
33  
34  
35  
36  
37  
38

### 39 **Ethics and dissemination**

40  
41 351 This study protocol was approved by the ethics committee of the Centre Hospitalier de  
42  
43 352 l'Université de Montréal, Canada (Reference numbers 2021-9247 20.253 & 2021-9270 20.226)  
44  
45 353 and the Medical Research Ethics Committee of Navarra, Spain (Reference number  
46  
47 354 PI107/2020). Any modifications to the approved protocol would be resubmitted to both  
48  
49 355 committees.  
50

51  
52 356 Preliminary summary results of this study will be regularly shared with participants via email  
53  
54 357 and through focal meetings. Final results will also be disseminated in open-access scientific  
55  
56 358 journals and international conferences. A two-page summary of results will be prepared in  
57  
58  
59  
60

1  
2  
3 359 Spanish and posted on the municipal and university website, and shared with local civil and  
4  
5 360 health authorities, as well as with individual participants.  
6  
7  
8 361

9  
10 362 **Discussion**

11  
12 363 The current COVID-19 pandemic highlights the incapacity of existing surveillance networks to  
13  
14 364 rapidly curb the impact of emerging respiratory pathogens in the current globalized world.  
15  
16 365 (13) This is particularly true in low- and middle-income countries, where diagnostic and  
17  
18 366 contact-tracing efforts are limited by their crippling costs, and where epidemiological data  
19  
20 367 aggregation infrequently translates into actionable information because of delays inherent to  
21  
22 368 disaggregated and poorly digitalized health information systems. Continuous, individual-  
23  
24 369 based, and passive monitoring of cough among entire populations could represent  
25  
26 370 inexpensive large-scale surveillance networks contributing to the early detection of outbreaks  
27  
28 371 and enabling prioritized and focal delivery of limited resources.  
29  
30  
31  
32 372

33  
34 373 AI and more specifically machine learning models, are increasingly used in disease surveillance  
35  
36 374 and can maximize the impact of limited available resources. (14) Integration of such models  
37  
38 375 with accurate digital epidemiological data was shown to provide reliable, near-real time  
39  
40 376 estimations of influenza disease incidence. (15) The widespread distribution of smartphones  
41  
42 377 coupled with the development of AI-enabled sound classification models now represent  
43  
44 378 another new potential breakthrough in public health and epidemic preparedness. Beyond  
45  
46 379 being able to detect cough, most smartphones have integrated geo-location functions. This  
47  
48 380 allows the integration of acoustic records with geo-spatial and temporal data and increases  
49  
50 381 the range of applications of acoustic surveillance systems for disease control. (16)  
51  
52 382

53  
54 383 Apart from participating in a collective disease tracking and eradication effort, participants  
55  
56 384 monitoring their cough also benefit from objective feedback on their own symptomatology.  
57  
58  
59  
60



1  
2  
3 385 During a pandemic, such feedback could trigger appropriate healthcare seeking behaviours  
4  
5 386 and self-quarantine further helping to limit disease transmission at community level.  
6  
7  
8 387

9  
10 388 Implementing such an innovative approach to disease surveillance is contingent on  
11  
12 389 overcoming substantial challenges. Evidence suggests that users are typically willing to install  
13  
14 390 mobile apps with a clearly perceived health benefit. But this is often limited by issues such as  
15  
16 391 increased battery drainage, or disruption of daily activities by alerts and notifications. (17)  
17  
18 392 Specifically, for acoustic surveillance apps, protecting user's privacy must also be a priority, in  
19  
20 393 order to create the social trust needed to achieve a high uptake of these systems. To  
21  
22 394 guarantee this, users must be able to clearly understand the nature of these applications, as  
23  
24 395 well as to control their functioning at will. This means that the quality of the data recorded  
25  
26 396 will greatly depend on individual behaviours.  
27  
28  
29

30 397

31  
32 398 Despite proven technical capacity and tremendous potential in complementing surveillance  
33  
34 399 systems, whether listed challenges can be overcome and whether digital cough monitoring  
35  
36 400 can provide actionable public health information remains unknown. This study will address  
37  
38 401 those questions. It will also generate operational expertise and qualitative knowledge on the  
39  
40 402 facilitators to be exploited, and the barriers to be addressed in order to maximize uptake and  
41  
42 403 impact prior to implementation on a wider scale.  
43  
44  
45

46 404

#### 49 405 **Limitations and potential challenges**

50  
51  
52 406 Enrolment and retention are expected to represent the major limitations of this project.  
53  
54 407 Acoustic syndromic surveillance tools might be perceived as threatening for the privacy of  
55  
56 408 potential participants. Furthermore, the quantity of cough data recorded will heavily rely on  
57  
58 409 the regular use of the system by participants. The diversity of respiratory and non-respiratory  
59  
60

1  
2  
3 410 conditions that can cause cough, as well as the consumption of medications to treat them,  
4  
5 411 can make it difficult to link changes in cough frequency with epidemiological data. Finally,  
6  
7 412 asymptomatic, or mild infections of SARS-CoV-2 and other respiratory pathogens, mean that  
8  
9 413 a proportion of infected patients will not contribute to the cough-based surveillance system  
10  
11 414 and are unlikely to seek medical attention, reducing available cough and epidemiological data  
12  
13 415 necessary for the analysis. Those limitations and challenges reflect well the impediments to  
14  
15 416 larger scale deployment of cough-based syndromic surveillance for any respiratory disease  
16  
17  
18 417 hence making this innovative study an ideal stress-test for such approach.  
19  
20  
21  
22  
23  
24  
25  
26  
27  
28  
29  
30  
31  
32  
33  
34  
35  
36  
37  
38  
39  
40  
41  
42  
43  
44  
45  
46  
47  
48  
49  
50  
51  
52  
53  
54  
55  
56  
57  
58  
59  
60

1  
2  
3 **418 Acknowledgements**  
4

5 419 The authors want to thank the Municipality of the Cendea de Cizur, the University of Navarra  
6  
7 420 and all participants for their trust and desire to participate in citizen science and altruistic  
8  
9 421 population-level syndromic surveillance.  
10

11  
12 422

13  
14 **423 Contributors**  
15

16 424 All authors meet criteria for authorship as per the BMJ Global Health policy and ICJME  
17  
18 425 recommendations. Conceptualization (JCGF, JB, DD, NU, LYT, SGL, CCh), data curation (JCGF,  
19  
20 426 JB, NU, CCh), formal analysis (JCGF, JB, NU, SGL, CCh), funding acquisition (SGL),  
21  
22 427 investigation (JCGF, JCh, AFM, VO, IB, JBart, CCh), methodology (JCGF, JB, NU, SGL, CCh),  
23  
24 428 supervision (JCGF, SGL, CCh), writing of the original draft (JCGF, CCh, SGL). All authors have  
25  
26 429 read, reviewed, discussed, and approved the final manuscript and their respective  
27  
28 430 representation in the authorship.  
29  
30  
31

32  
33 **431 Data sharing statement**  
34

35  
36 432 Aggregated deidentified datasets will be available upon completion of the study by  
37  
38 433 reasonable request to the corresponding author.  
39  
40

41  
42 **434 Funding**  
43

44 435 This study was funded by the *Patrick J. McGovern Foundation* (grant name: “Early diagnosis of  
45  
46 436 COVID-19 by utilizing Artificial Intelligence and Acoustic Monitoring”). The funders had no role  
47  
48 437 in study design, data collection and interpretation, or the decision to submit the work for  
49  
50 438 publication. CCh received salary support from *Unitaid* (grant name: BOHEMIA). ISGlobal  
51  
52 439 acknowledges support from the Spanish Ministry of Science and Innovation through the  
53  
54 440 “Centro de Excelencia Severo Ochoa 2019-2023” Program (grant number: CEX2018-000806-  
55  
56 441 S), and support from the Generalitat de Catalunya through the CERCA program.  
57  
58  
59

60 442

1  
2  
3 443 **Competing interest**

4  
5 444 JB is the CEO of Hyfe™ Inc. Hyfe Inc had no role in the decision to submit this protocol for  
6  
7 445 publication. All other authors declare no competing interests. Upon submission of this  
8  
9 446 protocol for publication, JCG, SGL and CCh had full access to all the data available and assumed  
10  
11 447 responsibility for the decision to submit the manuscript content for publication.  
12  
13

14 448

15  
16 449 **References**

17  
18  
19 450 1. Huang C, Wang Y, Li X, Ren L, Zhao J, Hu Y, et al. Clinical features of patients infected with  
20  
21 451 2019 novel coronavirus in Wuhan, China. *The Lancet*. 2020;395(10223):497-506.

22  
23 452 2. Kim GU, Kim MJ, Ra SH, Lee J, Bae S, Jung J, et al. Clinical characteristics of asymptomatic  
24  
25 453 and symptomatic patients with mild COVID-19. *Clin Microbiol Infect*. 2020;26(7):948.e1-.e3.  
26  
27 454 PubMed PMID: 32360780. Epub 05/01. eng.

28  
29  
30 455 3. Grant MC, Geoghegan L, Arbyn M, Mohammed Z, McGuinness L, Clarke EL, et al. The  
31  
32 456 prevalence of symptoms in 24,410 adults infected by the novel coronavirus (SARS-CoV-2;  
33  
34 457 COVID-19): A systematic review and meta-analysis of 148 studies from 9 countries. *PLoS One*.  
35  
36 458 2020;15(6):e0234765-e. PubMed PMID: 32574165. eng.

37  
38  
39 459 4. Agrawal A, Bhardwaj R. Probability of COVID-19 infection by cough of a normal person and  
40  
41 460 a super-spreader. *Physics of Fluids*. 2021 2021/03/01;33(3):031704.

42  
43 461 5. Hall JI, Lozano M, Estrada-Petrocelli L, Birring S, Turner R. The present and future of cough  
44  
45 462 counting tools. *J Thorac Dis*. 2020;12(9):5207-23. PubMed PMID: 33145097. eng.

46  
47  
48 463 6. Rasheed J, Jamil A, Hameed AA, Aftab U, Aftab J, Shah SA, et al. A survey on artificial  
49  
50 464 intelligence approaches in supporting frontline workers and decision makers for the COVID-  
51  
52 465 19 pandemic. *Chaos, Solitons, and Fractals*. 2020;141:110337 -

53  
54 466 7. Kvapilova L, Boza V, Dubec P, Majernik M, Bogar J, Jamison J, et al. Continuous Sound  
55  
56 467 Collection Using Smartphones and Machine Learning to Measure Cough. *Digit Biomark*.  
57  
58 468 2019;3(3):166-75. PubMed PMID: 32095775. eng.  
59  
60

- 1  
2  
3 469 8. Peeling RW, Wedderburn CJ, Garcia PJ, Boeras D, Fongwen N, Nkengasong J, et al. Serology  
4  
5 470 testing in the COVID-19 pandemic response. *The Lancet Infectious Diseases*. 2020  
6  
7 471 2020/09/01/;20(9):e245-e9.
- 8  
9 472 9. Chowdhury R, Luhar S, Khan N, Choudhury SR, Matin I, Franco OH. Long-term strategies to  
10  
11 473 control COVID-19 in low and middle-income countries: an options overview of community-  
12  
13 474 based, non-pharmacological interventions. *European Journal of Epidemiology*. 2020  
14  
15 475 2020/08/01;35(8):743-8.
- 16  
17 476 10. Farkas K, Hillary LS, Malham SK, McDonald JE, Jones DL. Wastewater and public health:  
18  
19 477 the potential of wastewater surveillance for monitoring COVID-19. *Curr Opin Environ Sci*  
20  
21 478 *Health*. 2020;17:14-20. PubMed PMID: 32835157. Epub 06/12. eng.
- 22  
23 479 11. Ho SL, Xie M. The use of ARIMA models for reliability forecasting and analysis. *Computers*  
24  
25 480 *& Industrial Engineering*. 1998 1998/10/01;35(1):213-6.
- 26  
27 481 12. Nouvet E, Knoblauch AM, Passe I, Andriamidanarivo A, Ravelona M, Ainanomena  
28  
29 482 Ramtariharisoa F, et al. Perceptions of drones, digital adherence monitoring technologies and  
30  
31 483 educational videos for tuberculosis control in remote Madagascar: a mixed-method study  
32  
33 484 protocol. *BMJ Open*. 2019;9(5):e028073.
- 34  
35 485 13. WHO Coronavirus (COVID-19) Dashboard: World Health Organization; 2021 [cited 2021  
36  
37 486 06/03]. Available from: <https://covid19.who.int/>.
- 38  
39 487 14. Naseem M, Akhund R, Arshad H, Ibrahim MT. Exploring the Potential of Artificial  
40  
41 488 Intelligence and Machine Learning to Combat COVID-19 and Existing Opportunities for LMIC:  
42  
43 489 A Scoping Review. *Journal of Primary Care & Community Health*. 2020  
44  
45 490 2020/01/01;11:2150132720963634.
- 46  
47 491 15. Santillana M, Nguyen AT, Louie T, Zink A, Gray J, Sung I, et al. Cloud-based Electronic Health  
48  
49 492 Records for Real-time, Region-specific Influenza Surveillance. *Scientific Reports*. 2016  
50  
51 493 2016/05/11;6(1):25732.
- 52  
53  
54  
55  
56  
57  
58  
59  
60

1  
2  
3 494 16. Mukundarajan H, Hol FJH, Castillo EA, Newby C, Prakash M. Using mobile phones as  
4  
5 495 acoustic sensors for high-throughput mosquito surveillance. eLife. 2017  
6  
7 496 2017/10/31;6:e27854.

8  
9  
10 497 17. Liss DT, Serrano E, Wakeman J, Nowicki C, Buchanan DR, Cesan A, et al. "The Doctor Needs  
11  
12 498 to Know": Acceptability of Smartphone Location Tracking for Care Coordination. JMIR mHealth  
13  
14 499 and uHealth. 2018 May 4;6(5):e112. PubMed PMID: 29728349. Pubmed Central PMCID:  
15  
16 500 PMC5960037. Epub 2018/05/08. eng.

17  
18  
19 501

20 502 **Supplementary materials**

21  
22 503 1. Informed Consent Form

23  
24 504 2. Assent form

25  
26 505 3. Complementary medical questionnaire for participants

27  
28 506 4. SPIRIT Checklist

29  
30  
31  
32 507 I, the Submitting Author has the right to grant and does grant on behalf of all authors of the  
33  
34 508 Work (as defined in the below author licence), an exclusive licence and/or a non-exclusive  
35  
36 509 licence for contributions from authors who are: i) UK Crown employees; ii) where BMJ has  
37  
38 510 agreed a CC-BY licence shall apply, and/or iii) in accordance with the terms applicable for US  
39  
40 511 Federal Government officers or employees acting as part of their official duties; on a  
41  
42 512 worldwide, perpetual, irrevocable, royalty-free basis to BMJ Publishing Group Ltd ("BMJ") its  
43  
44 513 licensees and where the relevant Journal is co-owned by BMJ to the co-owners of the  
45  
46 514 Journal, to publish the Work in BMJ Global Health and any other BMJ products and to exploit  
47  
48 515 all rights, as set out in our [licence](#).

49  
50  
51  
52 516

53  
54 517 The Submitting Author accepts and understands that any supply made under these terms is  
55  
56 518 made by BMJ to the Submitting Author unless you are acting as an employee on behalf of  
57  
58 519 your employer or a postgraduate student of an affiliated institution which is paying any

1  
2  
3 520 applicable article publishing charge (“APC”) for Open Access articles. Where the Submitting  
4  
5 521 Author wishes to make the Work available on an Open Access basis (and intends to pay the  
6  
7 522 relevant APC), the terms of reuse of such Open Access shall be governed by a Creative  
8  
9 523 Commons licence – details of these licences and which [Creative Commons](#) licence will apply  
10  
11  
12 524 to this Work are set out in our licence referred to above.  
13  
14

## 15 525 **Figure legends**

16  
17  
18 526 **Figure 1:** Study design, timeline and monitoring plan for the study’s primary objective.  
19

20 527 **Figure 2:** Receiver operating characteristic (ROC) analysis showing an area under the curve  
21  
22 528 (AUC) of 0.995 for the classification of cough in participants recruited between November  
23  
24 529 and December 2020.

25 530 **Figure 3:** Coughs per person-hour registered in participants recruited between November  
26  
27 531 2020 and January 2021.

28 532 **Figure 4:** Heatmap of registered cough episodes in the municipalities of Zizur Mayor, Cendea  
29  
30 533 de Cizur, and Pamplona between November 2020 and March 2021 (The Cendea de Cizur is  
31  
32 534 an incontiguous municipality).  
33  
34  
35  
36  
37  
38  
39  
40  
41  
42  
43  
44  
45  
46  
47  
48  
49  
50  
51  
52  
53  
54  
55  
56  
57  
58  
59  
60

1  
2  
3  
4  
5  
6  
7  
8  
9  
10  
11  
12  
13  
14  
15  
16  
17  
18  
19  
20  
21  
22  
23  
24  
25  
26  
27  
28  
29  
30  
31  
32  
33  
34  
35  
36  
37  
38  
39  
40  
41  
42  
43  
44  
45  
46  
47  
48  
49  
50  
51  
52  
53  
54  
55  
56  
57  
58  
59  
60

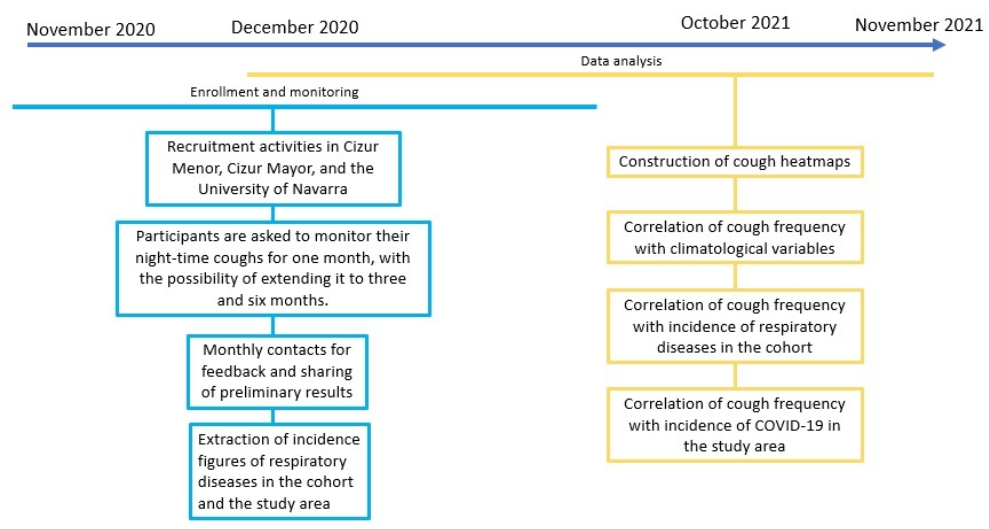

Figure 1

230x128mm (96 x 96 DPI)



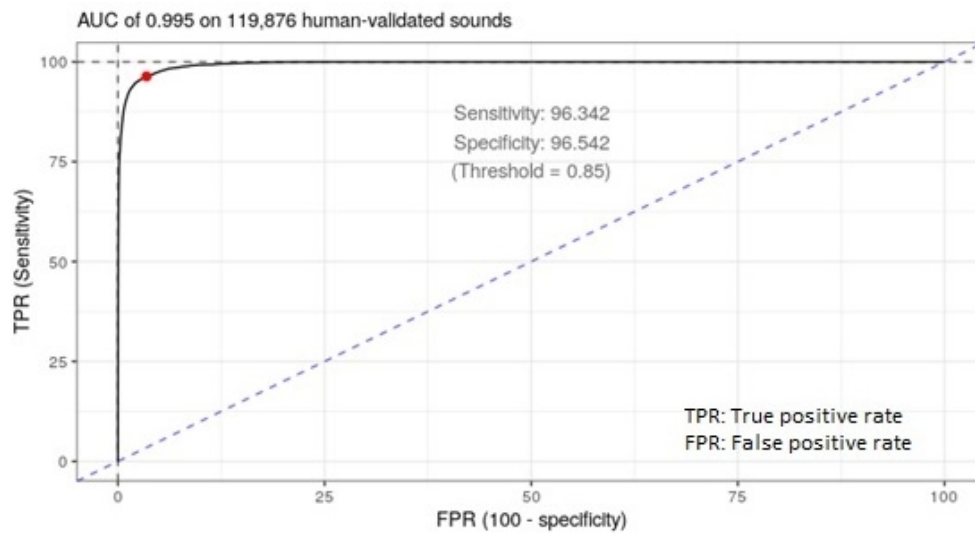

Figure 2

147x79mm (96 x 96 DPI)

1  
2  
3  
4  
5  
6  
7  
8  
9  
10  
11  
12  
13  
14  
15  
16  
17  
18  
19  
20  
21  
22  
23  
24  
25  
26  
27  
28  
29  
30  
31  
32  
33  
34  
35  
36  
37  
38  
39  
40  
41  
42  
43  
44  
45  
46  
47  
48  
49  
50  
51  
52  
53  
54  
55  
56  
57  
58  
59  
60

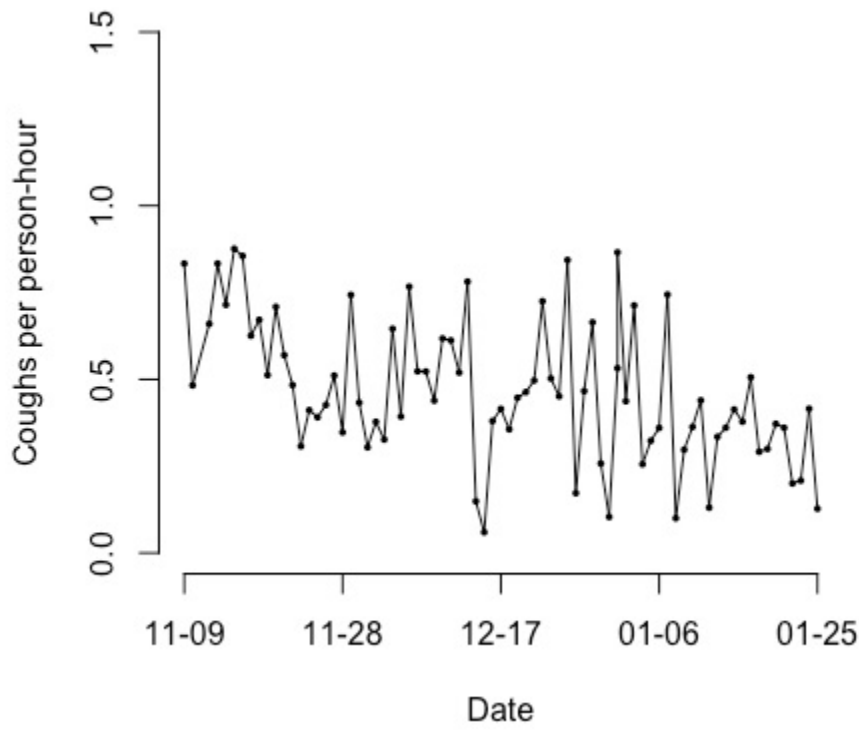

Figure 3

115x99mm (96 x 96 DPI)

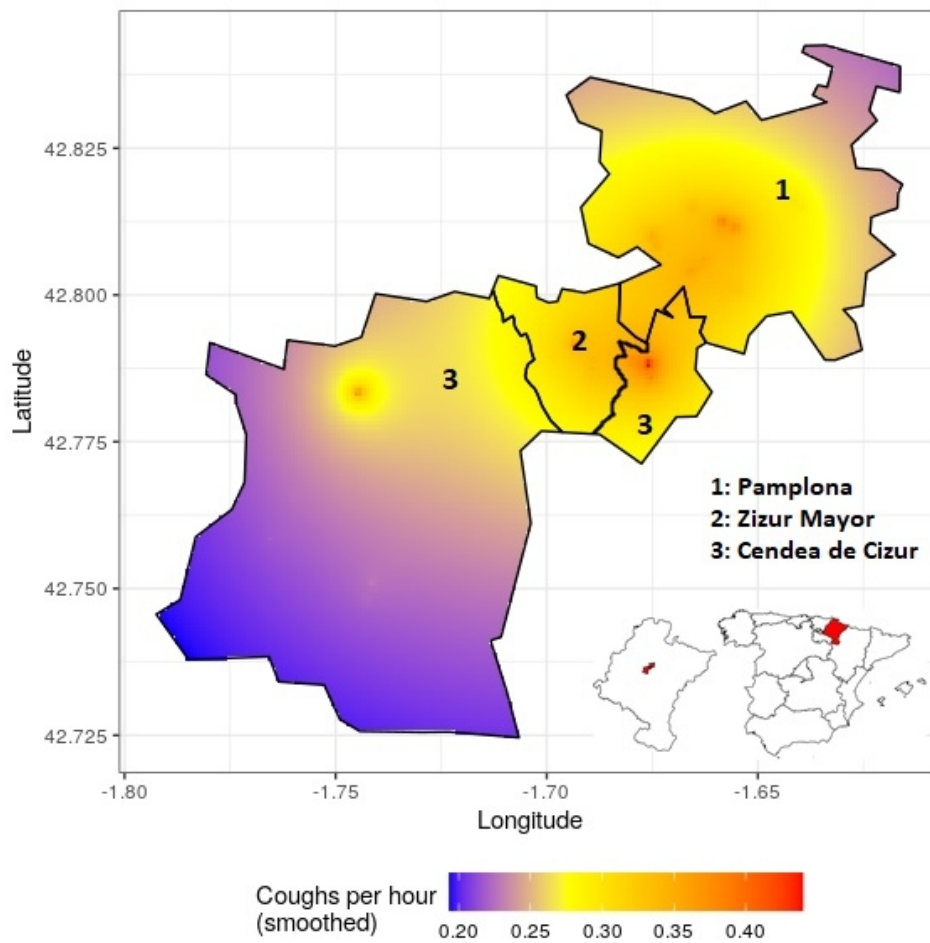

Figure 4

157x151mm (96 x 96 DPI)

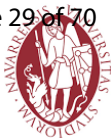

## **HOJA DE INFORMACIÓN Y CONSENTIMIENTO**

**Versión 3.0, 6 de enero de 2021**

**TÍTULO DEL ESTUDIO:** Vigilancia acústica y monitorización digital de la tos a nivel poblacional para la detección temprana de brotes de enfermedades respiratorias. Un estudio observacional exploratorio.

### **CÓDIGO DEL PROMOTOR:**

### **PROMOTOR**

Clínica Universidad de Navarra/Universidad de Navarra, Avenida de Pío XII, 36  
31008 Pamplona.

### **FINANCIACIÓN:**

Este estudio está siendo financiado por el Centre Hospitalier de l'Université de Montréal (CHUM) y la fundación Patrick J. McGovern a través de una subvención otorgada al co-investigador Simon Grandjean Lapierre (*Early diagnosis of COVID-19 by utilizing Artificial Intelligence and Acoustic Monitoring*).

### **INVESTIGADOR PRINCIPAL**

***Carlos Chaccour***

***Teléfono +34 666 293 112***

***Email cchaccour@unav.es***

### **INTRODUCCIÓN**

Nos dirigimos a usted para informarle sobre un estudio de investigación en el que se le invita a participar. El estudio ha sido aprobado por un Comité de Ética de la Investigación de la Universidad de Navarra, el comité de ética de la investigación con medicamentos de Navarra y el comité de ética del Centre Hospitalier de l'Université de Montréal (CHUM), en Canadá.

Con este documento pretendemos que usted reciba la información adecuada para que pueda entender de qué se trata el estudio y decidir si desea o no participar en el mismo. Para ello, lea esta hoja informativa con atención y nosotros le aclararemos las dudas que puedan surgir después de la explicación. Además, puede consultar con las personas que considere oportuno.

### **PARTICIPACIÓN VOLUNTARIA**

1  
2  
3 Debe saber que su participación en este estudio es voluntaria y que puede  
4 decidir no participar o cambiar su decisión y retirar el consentimiento en cualquier momento, sin que  
5 por ello se altere la relación con su médico ni se produzca perjuicio alguno en su tratamiento.  
6  
7

### 8 9 **DESCRIPCIÓN GENERAL DEL ESTUDIO**

10 Los coronavirus son un grupo de virus que causan infecciones respiratorias generalmente leves. Sin  
11 embargo, un miembro de este grupo, el SARS-Cov-2, es el responsable de provocar la COVID-19, una  
12 enfermedad potencialmente peligrosa que desde finales del 2019 se ha extendido a lo largo de todo  
13 el mundo.  
14

15 Uno de los elementos necesarios para contener el avance de la pandemia de COVID-19 es entender  
16 su escala real. Esto es particularmente importante ahora que los brotes regulares en zonas en las que  
17 simultáneamente ocurre transmisión a una menor escala se han convertido en una realidad. Uno de  
18 los mayores obstáculos de los sistemas sanitarios es la limitada capacidad de hacer pruebas  
19 diagnósticas, lo que se traduce en retrasos en la búsqueda de atención médica, así como en la  
20 recolección de la información necesaria para planear intervenciones que limiten la expansión de la  
21 enfermedad.  
22

23 La gran mayoría de pacientes con COVID-19 presentan tos como un síntoma temprano de la  
24 enfermedad. Este estudio pretende evaluar la utilidad de una aplicación para el móvil, llamada  
25 HyfeApp, que registra y evalúa patrones de tos, como complemento a las estrategias de vigilancia  
26 epidemiológica existentes. Para esto, estimamos que será necesario grabar y analizar episodios  
27 individuales de tos.  
28

29 Por eso esperamos que el mayor número posible de habitantes instale la aplicación. Esta aplicación  
30 se ejecuta en segundo plano en el móvil. Aunque HyfeApp tiene acceso continuo al micrófono de su  
31 móvil, ha sido diseñada para procesar únicamente sonidos compatibles con las características de la  
32 tos humana. Cuando uno de estos sonidos es detectado y grabado por la aplicación, un algoritmo de  
33 inteligencia artificial lo estudia y en caso de decidir qué se trata de un episodio de tos, se guarda junto  
34 a la información sobre la ubicación geográfica y el momento en que ocurrió, que es proporcionada  
35 por el sistema GPS del móvil.  
36

37 Aparte de la información suministrada por la aplicación, también revisaremos los registros médicos  
38 de aquellas personas dispuestas a participar que acudan a consulta en el sistema nacional de salud, o  
39 la Clínica Universidad de Navarra. El objetivo de esto es recolectar información sobre la presencia de  
40 tos durante la exploración médica, o el diagnóstico de alguna enfermedad respiratoria en alguna de  
41 las visitas. Solo se consultará información relacionada con alguna de las siguientes condiciones:  
42

- 43 ● Tos no específica.
  - 44 ● Infecciones del tracto respiratorio superior.
  - 45 ● Faringitis.
  - 46 ● Asma.
  - 47 ● Bronquitis.
  - 48 ● Enfermedad Broncopulmonar Obstructiva Crónica (EBPOC).
  - 49 ● COVID-19
- 50  
51  
52  
53  
54  
55  
56  
57  
58  
59  
60

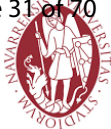

- Enfermedad por Reflujo Gastroesofágico (ERGE)
- Influenza
- Neumonía (por cualquier causa)
- Infección por virus sincitial respiratorio (VSR)
- Infecciones respiratorias inespecíficas.

Otros exámenes paraclínicos a ser recolectados incluyen:

- Microbiología
  - Pruebas de COVID-19
  - PCR para influenza
  - Cultivo de esputo
- Hematología
  - Hematología completa
  - Prueba del dímero D.
- Bioquímica
  - Proteína C reactiva
  - Procalcitonina
  - CPK
  - LDH
  - Ferritina

Aparte de la información obtenida de la app y sus registros médicos, también le pediremos a un grupo reducido de participantes que formen parte de discusiones grupales focalizadas, para explorar los desafíos que representa el uso continuo de HyfeApp, y su participación en el estudio. En caso de que se le solicite participar, usted podrá aceptar o negarse.

### **Duración**

Se recolectará información inicialmente por un período de 1 mes, consultándosele en ese momento su disposición a seguir participando por 3 y 6 meses. Usted podrá negarse a seguir participando en el estudio en cualquier momento.

### **Procedimientos del estudio**

Usted no puede participar en el ensayo si:

- No puede o no quiere aceptar compartir su información codificada, relacionada a sus registros de tos con bases de datos usadas para refinar los diagnósticos basados en perfiles acústicos.
- Si tiene menos de 13 años de edad.
- Si no tiene un teléfono inteligente capaz de ejecutar HyfeApp.
- Si no es un estudiante/trabajador de la Universidad de Navarra, o un paciente diagnosticado con una enfermedad causante de tos en la Clínica Universidad de Navarra.

- Si no es residente en Navarra.

Si usted decide participar, un miembro de nuestro equipo lo ayudará a instalar la aplicación en su móvil. No serán necesarias nuevas visitas de parte del equipo de investigación, pero serán contactados una vez al mes para obtener comentarios sobre su experiencia usando la aplicación y ratificar su consentimiento y disposición a seguir participando en el estudio. También podrá ser contactado vía correo electrónico para recibir actualizaciones periódicas sobre el estado del proyecto y sus resultados preliminares.

### **LA APLICACIÓN HYFEAPP**

HyfeApp es una aplicación móvil disponible para los sistemas operativos Android y iOS (Apple), desarrollada por un equipo multidisciplinario que incluye analistas de datos, desarrolladores de software y médicos especialistas en enfermedades infecciosas.

#### **¿Qué hace HyfeApp?**

HyfeApp se ejecuta constantemente en el segundo plano de su móvil, sin interferir con el funcionamiento de otras aplicaciones, pero teniendo acceso a su micrófono y grabando recortes de sonidos explosivos de menos de 0.5 segundos de duración. Ni las conversaciones, ni los sonidos de fondo son grabados. Estos recortes son enviados a un servidor, donde un algoritmo de inteligencia artificial identifica aquellos que presentan cambios súbitos y cortos en los decibeles, compatibles con episodios de tos. Posteriormente, otro algoritmo los procesa, evaluando otras características y determinando si efectivamente se trató de un episodio de tos. El servidor envía esta información de vuelta al móvil, de forma que los archivos clasificados como tos se incorporan a los registros mostrados por la aplicación.

HyfeApp es una herramienta que le proporciona información sobre su estado de bienestar. Tal como herramientas similares que cuentan calorías, registran el número de pasos o ronquidos. La única diferencia es que HyfeApp cuenta episodios de tos.

#### **Beneficios y riesgos por su participación en estudio**

HyfeApp le permitirá llevar un registro del número de veces que tose al día, así como evidenciar cambios con respecto a días anteriores. Sin embargo, no es una herramienta de diagnóstico o tratamiento médico. Por lo tanto, ni provee información o consejos médicos, ni sustituye de ninguna forma a los servicios sanitarios: HyfeApp no es un instrumento médico especializado. Si usted tiene alguna duda sobre su estado de salud, debe consultarlas con un médico o en caso de emergencia, llamar a los servicios respectivos inmediatamente .

Grabar sonidos desde un móvil inmediatamente genera dudas sobre la forma en que será manejada la información, y garantizada la privacidad de los participantes. Como hemos explicado anteriormente, HyfeApp no graba conversaciones ni sonidos de ambiente. Los segmentos de 0.5 segundos grabados por la aplicación no permiten identificar a los participantes. Sin embargo, algunos de estos sonidos pudiesen permitir identificar al participante si son interpretados en conjunto a otra metadata registrada por la aplicación (como el número de teléfono, por ejemplo). Por esta razón, toda la

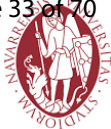

información transmitida por la aplicación estará encriptada y manejada según los protocolos de seguridad estándar empleados en este tipo de estudios. De esta forma, únicamente los investigadores podrán asociar los datos recolectados por la aplicación, a otros elementos que permitan identificar a los participantes.

No será remunerado por su participación en este estudio.

## CONFIDENCIALIDAD

Toda la información recolectada en este estudio se mantendrá codificada, de forma que no pueda ser vinculada a sus datos personales. Solo el investigador principal y los co-investigadores sabrán su nombre y en cualquier documento o comunicación se usará un número de identificación personal asignado a cada participante. Los ordenadores utilizados para analizar los datos de este estudio tendrán contraseñas y solo investigadores autorizados podrán acceder a ellas.

La Universidad de Navarra, como responsable del tratamiento de datos, se compromete al cumplimiento de la Ley Orgánica del 3/2018, de 5 de diciembre y demás normativa de protección de datos en vigor. Por ello, es importante que conozca la siguiente información:

- Además de los derechos que ya conoce (acceso, modificación, oposición y cancelación de datos) ahora también puede limitar el tratamiento de datos que sean incorrectos, solicitar una copia o que se trasladen a un tercero (portabilidad) los datos que usted ha facilitado para el estudio. Para ejercer sus derechos, diríjase al Delegado de Protección de Datos de la institución en [[protecciondedatosnav@unav.es](mailto:protecciondedatosnav@unav.es)]. Así mismo tiene derecho a dirigirse a la Agencia de Protección de Datos si no quedara satisfecho/a.
- Tanto el Centro como el Promotor son responsables respectivamente del tratamiento de sus datos y se comprometen a cumplir con la normativa de protección de datos en vigor. Los datos recogidos para el estudio estarán identificados mediante un código, de manera que no se incluya información que pueda identificarle, y sólo su médico del estudio/colaboradores podrá relacionar dichos datos con usted y con su historia clínica. Por lo tanto, su identidad no será revelada a ninguna otra persona salvo a las autoridades sanitarias, cuando así lo requieran o en casos de urgencia médica. Los Comités de Ética de la Investigación, los representantes de la Autoridad Sanitaria en materia de inspección y el personal autorizado por el Promotor, únicamente podrán acceder para comprobar los datos personales, los procedimientos del estudio clínico y el cumplimiento de las normas de buena práctica clínica (siempre manteniendo la confidencialidad de la información).
- El Investigador y el Promotor están obligados a conservar los datos recogidos para el estudio al menos hasta 25 años tras su finalización. Posteriormente, su información personal solo se conservará por el centro para el cuidado de su salud y por el promotor para otros fines de investigación científica si usted hubiera otorgado su consentimiento para ello, y si así lo permite la ley y requisitos éticos aplicables.
- Si realizáramos transferencia de sus datos codificados fuera de la UE a las entidades de nuestro grupo, a prestadores de servicios o a investigadores científicos que colaboren con nosotros, los datos del participante quedarán protegidos con salvaguardas tales como contratos u otros mecanismos por las autoridades de protección de datos. Si el participante quiere saber más al respecto, puede contactar al Delegado de Protección de Datos del promotor [[protecciondedatosnav@unav.es](mailto:protecciondedatosnav@unav.es)].



### COMPENSACIÓN ECONÓMICA

El promotor del estudio es el responsable de gestionar la financiación del mismo. Para la realización del estudio, el promotor ha firmado un contrato con el centro donde se va a realizar y con el médico del estudio.

Su participación en este estudio no le causará costes adicionales diferentes de los asociados a su tratamiento habitual. La asistencia rutinaria deberá ser pagada por la seguridad social, por su seguro médico o por usted mismo.

Usted no recibirá ninguna compensación económica por su participación en este estudio.

### OTRA INFORMACIÓN RELEVANTE

Cualquier nueva información referente a la aplicación utilizada en el estudio y que pueda afectar su disposición para participar en el mismo, que se descubra durante su participación, le será comunicada lo antes posible.

Si usted decide retirar el consentimiento para participar en este estudio, no se añadirán nuevos datos a la base de datos y puede exigir la destrucción de cualquier información identificable previamente retenidas para evitar la realización de nuevos análisis.

También debe saber que puede ser excluido del estudio si el promotor y/o los investigadores del estudio lo consideran oportuno, ya sea por motivos de seguridad, por cualquier acontecimiento adverso derivado de su participación, o porque consideren que no está cumpliendo con los procedimientos establecidos. En cualquiera de los casos, usted recibirá una explicación adecuada del motivo que ha ocasionado su retirada del estudio

### COMPARTIENDO LOS RESULTADOS

Usted tendrá acceso a todo el conocimiento generado por esta investigación en todo momento, solo debe preguntar al investigador principal. No compartiremos su nombre, estado de salud o dirección. Eventualmente, los resultados serán publicados, de forma tal que cualquier persona interesada en conocerlos, pueda acceder a ellos. Usted podrá solicitar información sobre el estado y los resultados del estudio, preguntándole directamente al investigador principal.

Al firmar el formulario de consentimiento adjunto, se compromete a cumplir con los procedimientos del estudio que se le han expuesto.

### DERECHO A NEGARSE A PARTICIPAR O ABANDONAR EL ESTUDIO

- No tiene que participar en este estudio si no desea hacerlo.
- Tiene el derecho a NO firmar este formulario. Si no desea firmar este formulario, no podrá participar en este estudio de investigación. Esto se debe a que necesitamos su permiso por escrito antes de poder usar su información.
- Tiene el derecho a abandonar este estudio incluso después de haber aceptado participar. Si decide abandonar el estudio, no usaremos su información. En caso de decidir

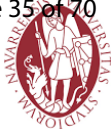

abandonar el estudio, por favor comuníquese con un miembro de nuestro personal. No tiene que explicar sus razones para abandonar el estudio.

### A QUIÉN CONTACTAR

Si no está satisfecho con la forma en que se llevó a cabo este estudio, o tiene alguna duda, queja o pregunta sobre sus derechos como participante, por favor contacte a la oficina de atención al paciente de la Clínica Universidad de Navarra, por teléfono (+34 948 255 400) o correo electrónico ([atpacientun@unav.es](mailto:atpacientun@unav.es)), para hablar con alguien independiente del equipo investigador.

Si tiene alguna duda sobre este estudio o sus procedimientos, ahora o en el futuro, puede comunicarse con: \_\_\_\_\_. Teléfono: \_\_\_\_\_. Quién es el investigador principal del estudio. Puede llamar de lunes a viernes entre las 8:00 y las 17:00 horas.

Al firmar el formulario de consentimiento adjunto, se compromete a cumplir con los procedimientos del estudio que se le han expuesto.

### Consentimiento Informado por escrito

**TÍTULO DEL ESTUDIO:** Vigilancia acústica y monitorización digital de la tos a nivel poblacional para la detección temprana de brotes de enfermedades respiratorias. Un estudio observacional exploratorio.

### **CÓDIGO DEL PROMOTOR:**

Versión y fecha:

Yo, (nombre y apellidos)

.....

He leído la hoja de información que se me ha entregado.

He podido hacer preguntas sobre el estudio.

He recibido suficiente información sobre el estudio.

He hablado con:

.....

(nombre y dos apellidos del investigador)

Comprendo que mi participación es voluntaria.

Comprendo que puedo retirarme del estudio:

1º Cuando quiera



1  
2  
3  
4  
5  
6  
7  
8  
9  
10  
11  
12  
13  
14  
15  
16  
17  
18  
19  
20  
21  
22  
23  
24  
25  
26  
27  
28  
29  
30  
31  
32  
33  
34  
35  
36  
37  
38  
39  
40  
41  
42  
43  
44  
45  
46  
47  
48  
49  
50  
51  
52  
53  
54  
55  
56  
57  
58  
59  
60

2º Sin tener que dar explicaciones.

3º Sin que esto repercuta en mis cuidados médicos.

Presto libremente mi conformidad para participar en el estudio y doy mi consentimiento para el acceso y utilización de mis datos en las condiciones detalladas en la hoja de información

**Firma del investigador:**

**Nombre:**

**Fecha:**

**Firma del investigador:**

**Nombre:**

**Fecha:**

**Firma del participante:**

**Nombre:**

**Fecha:**

**Firma del Representante legal o Testigo imparcial (táchese lo que no proceda):**

**DNI:**

**Fecha:**

**A causa de:**

Este documento se firmará por duplicado quedándose una copia el investigador y otra el participante.

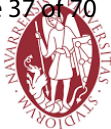**INFORMATION AND CONSENT SHEET****Version 3.0 (January 6<sup>th</sup>, 2021)**

**Study Title:** Acoustic surveillance and digital cough monitoring at population level for early respiratory disease outbreak detection, an exploratory observational study

**Promoter Code:****Promoter**

Clínica Universidad de Navarra/Universidad de Navarra, Avenida de Pío XII, 36  
31008 Pamplona

**Funder:** This study is funded by the Centre Hospitalier de l'Université de Montréal (CHUM) and the Patrick J. McGovern Foundation through a grant awarded to Co-Investigator Simon Grandjean Lapierre (*Early diagnosis of COVID-19 by utilizing Artificial Intelligence and Acoustic Monitoring*)

**Main Researcher:**

*Carlos Chaccour*  
Teléfono +34 666 293 112  
Email [cchaccour@unav.es](mailto:cchaccour@unav.es)

**Introduction**

The objective of this document is to inform you about the characteristics of a research study you have been invited to participate in. The study has been approved by the Committee of Research Ethics of the Universidad de Navarra and the Committee of Medication Ethics of Navarra (Spain), as well as the ethics committee from the Centre Hospitalier de l'Université de Montréal (CHUM), in Canada.

This document aims to provide you with proper information, so you can understand this study and decide by yourself if you are willing to take part or not in it. Please read this information document carefully and we will answer any questions that might come up afterwards. You can also discuss this with people you trust before making a decision.

**Voluntary Participation**

You must know that your participation in this study is voluntary and you can decide not to take part, or change your mind and withdraw your consent at any time in the future. This will not affect your relationship with your healthcare provider, nor harm your access to proper medical treatment in any way.

**General description of the study**

Coronaviruses are a group of viruses that cause generally mild respiratory disease. However, a member of this group, the SARS-Cov-2, is responsible for causing COVID-19, a potentially dangerous disease that has spread across the globe since 2019.

One of the necessary interventions to contain the COVID-19 pandemic is understanding its real scale. This is particularly important now that new outbreaks are being regularly reported in areas with ongoing low-level transmission. A major limitation in this process is the limited diagnostic capabilities of many countries, which translates into delays in the search of medical attention and collection of necessary epidemiological data.

1  
2  
3  
4  
5  
6  
7 Most patients with COVID-19 present cough as an early symptom of disease. This study aims to  
8 evaluate the usefulness of a mobile app called HyfeApp, which registers and studies cough patterns,  
9 as a complement to existing disease surveillance strategies. To do this, we will need to record and  
10 analyse episodes of cough in the town of Cizur Menor which has been selected as the location of the  
11 initial studies of this new platform.  
12

13 For this reason, we need as many people as possible installing the app. This App runs in the  
14 background of your mobile phone. Although HyfeApp has continuous access to the mobile's mic, it  
15 has been designed to exclusively process sounds that match the characteristics of human cough. When  
16 one of these sounds is detected and recorded by the app, an artificial intelligence algorithm studies it  
17 and determines whether it is indeed an episode of cough. If so, the record is stored, along with time  
18 and geographical information provided by the mobile's GPS.  
19

20  
21 Besides the information from the app, we will also review the medical records of those participants  
22 who present for a medical consultation in the national health system or the Clinica Universidad de  
23 Navarra. The objective of this is to collect information about the presence of cough, or any respiratory  
24 disease during one of those visits. Data from your medical chart will be obtained by the investigators  
25 from your local clinic or hospital. This includes without being limited to information related to any of  
26 the following conditions will be reviewed:  
27

- 28 ● Non-specific cough
- 29 ● Non-specific upper respiratory tract infections
- 30 ● Pharyngitis
- 31 ● Asthma
- 32 ● Bronchitis
- 33 ● Chronic Obstructive Pulmonary Disease (COPD)
- 34 ● COVID-19
- 35 ● Gastro-esophageal reflux disease (GERD)
- 36 ● Influenza
- 37 ● Pneumonia (any cause)
- 38 ● Respiratory Syncytial virus
- 39 ● Non-specific respiratory tract infections
- 40
- 41
- 42

43 Additional laboratory test data to be collected from the selected visits includes:

- 44 ● Microbiology
  - 45 ○ COVID-19 tests
  - 46 ○ Flu PCR
  - 47 ○ Sputum culture
- 48 ● Hematology
  - 49 ○ Full blood count
  - 50 ○ D-dimer test
- 51 ● Biochemistry
  - 52 ○ C-reactive protein
  - 53 ○ Procalcitonin
  - 54 ○ CPK
  - 55 ○ LDH
  - 56 ○ Ferritin
- 57 ● Radiology
- 58
- 59
- 60

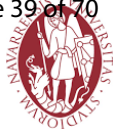

- Chest X-Ray
- Thorax CT-Scan

Besides the information from the app and medical charts, we will also solicit a restricted number of participants to participate in focus group discussions to explore the challenges related to using HyfeApp and participating in this study. If solicited, it will be your right to accept or refuse to participate in those focus groups.

### **Duration**

Data will be initially collected for a one-month period. You will then be offered the opportunity to continue in the study for 3 and 6 months. You can refuse continuing in the study at any point.

### **Study Procedures**

You will not be able to enroll in this study if you:

- Are incapable or unwilling to accept to share your codified cough data with multicenter databases aiming at refining acoustic-based diagnostics.
- Are under 13 years of age.
- Do not own a smartphone able to run HyfeApp.
- Are not a student/worker at the University of Navarra or a patient diagnosed with cough-related disease at the Clínica Universidad de Navarra.
- Are not a resident in Navarra.

In case you decide to take part, a member of our team will help you install the app on your mobile. No further visits from the research team will be necessary, but you might be contacted once a month to collect feedback on your experience using the app, as well as to confirm your willingness to continue in the study. You might also receive periodic updates via email, to keep you informed on the status of the project and relevant preliminary results.

### **About HyfeApp**

HyfeApp is a mobile app available for Android and IOS (Apple) operating systems, developed by a multidisciplinary team of data scientists, software developers and infectious disease physicians.

### **What does HyfeApp do?**

HyfeApp runs in the background of your mobile, without interfering with any other running app, but having constant access to your mic and recording explosive sound snips of 0.5 seconds or less. No conversations, nor ambient sounds are recorded. These sound snips are sent to a server, where an artificial intelligence algorithm processes them, evaluating their characteristics and determining if they were in fact, cough. The server then sends that data back to the mobile and the study investigator, so those files labeled as cough episodes are displayed by the app. HyfeApp is a wellness status tool. Just like similar apps that count calories, steps or snores. HyfeApp simply counts episodes of cough.

### **Benefits and risks of participating**

HyfeApp will allow you to have a record of the number of times you cough every day, and of any changes compared to previous days. However, it is not a diagnostic or treatment tool. Therefore, it does not provide medical advice, nor replaces healthcare services. HyfeApp is not medical equipment. If you ever have doubts regarding your health condition or status, you should consult a doctor, or in case of emergency, communicate with proper emergency services.

We are aware that recording sounds from a mobile phone generates doubts regarding the handling of information and the participants' privacy. As explained before, HyfeApp does not record conversations or ambient sounds, and the 0.5 second sound snips are too short to identify

1  
2  
3 participants. However, if linked to other metadata (such as telephone numbers),  
4 these sounds could allow identification. For this reason, all the information transmitted by the app is  
5 encrypted and handled following standard safety protocols. This way, we can make sure that only the  
6 researchers can access potentially identifiable data.

7  
8 You will not be paid for your participation.  
9

### 10 11 12 13 14 **Confidentiality**

15 All the information collected in this study will be codified in such a way that it cannot be linked to your  
16 personal data. Only the principal and co-investigators involved in this study will know your name, and  
17 an ID number will be used to refer to you in every document or communication. The computers used  
18 to store and analyze the data will be password-protected and only authorised researchers will have  
19 access to them.  
20

21  
22 The Universidad de Navarra, as the data controller, complies with the Organic Law 3/2018, of  
23 December 5, and other Spanish data protection regulations in force. Therefore, it is important that  
24 you know the following information:  
25

- 26 • In addition to the rights that you already know (access, modification, refusal and cancellation of  
27 data), you can now also limit the processing of incorrect data, request a copy, or have the data that  
28 you provided be transferred to a third party (portability) for the study. To exercise your rights, contact  
29 the Institution's Data Protection Officer at [protecciondedatosnav@unav.es]. You also have the right  
30 to contact the Data Protection Agency if you are not satisfied.  
31
- 32 • Both the Center and the Promoter are respectively responsible for the processing of your data and  
33 undertake to comply with the data protection regulations in force. The data collected for the study  
34 will be identified by a code, so that information that can identify you is not included, and only your  
35 study doctor / collaborators will be able to relate said data to you and to your medical history.  
36 Therefore, your identity will not be revealed to any other person except to the health authorities,  
37 when required or in cases of medical emergency. The Research Ethics Committees, the  
38 representatives of the Health Authority in matters of inspection and the personnel authorized by the  
39 Sponsor, may only access to verify personal data, clinical study procedures and compliance with the  
40 rules of good clinical practice (always maintaining the confidentiality of the information).  
41
- 42 • The Researcher and the Sponsor are obliged to keep the data collected for the study for at least 25  
43 years after its completion. Subsequently, your personal information will only be kept by the center for  
44 the care of your health and by the promoter for other scientific research purposes if you have given  
45 your consent to do so, and if this is allowed by the law and applicable ethical requirements.  
46
- 47 • If we transfer your encrypted data outside the EU to our group entities, service providers or scientific  
48 researchers who collaborate with us, the participant's data will be protected with safeguards such as  
49 contracts or other mechanisms by the protection authorities of data. If the participant wants to know  
50 more about it, he or she can contact the promoter's Data Protection Officer  
51 [protecciondedatosnav@unav.es].  
52  
53  
54  
55

### 56 57 **Economic Compensation**

58 The study promoter is responsible for managing the funds. Before doing a research study, the  
59 promoter must have signed a contract with the center where the study will take place, and the doctors  
60

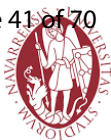

1  
2  
3 who will conduct the study. Your participation in this study will not cost you any  
4 extra money beyond your standard medical procedures. Routine medical assistance will have to be  
5 paid by the social security network, your medical insurance, or yourself.  
6

7 You will not receive any payment or monetary compensation for taking part in this study.  
8  
9

### 10 **Other relevant information**

11 Any new information regarding the app to be used in this study and that could affect your disposition  
12 to take part in it, discovered after you have decided to participate, will be communicated to you as  
13 soon as possible.  
14

15  
16 If you wish to withdraw your consent to take part in the study, no further personal data will be added  
17 to the database. You can also demand the destruction of any previously retained identifiable  
18 information, to prevent new analysis from being carried on.  
19

20  
21 You must also know that you could be excluded from the study if the promoter and/or researchers  
22 consider it to be adequate, either for your own safety, to prevent any adverse consequence deriving  
23 from your participation, or because they consider you are not complying with the established  
24 procedures. In any case, you will always receive a proper explanation of what caused your withdrawal  
25 from the study.  
26

### 27 **Sharing the results**

28  
29 At all time, you will have access to the knowledge we get from the research upon request to the  
30 principal investigator. We will not share your name, health status or where you live. After this, we will  
31 publish the results so that other interested people may learn from our research. You will be able to  
32 ask the status of this study and its findings by a direct request to the principal investigator.  
33

### 34 **Right to refuse or withdraw**

35 You don't have to take part in this research study if you do not wish so. You have the right not to sign  
36 this form. If you do not sign this form, you cannot take part in this research study. This is because we  
37 need your written permission to use your information. You have the right to leave the research study.  
38 If you would like to leave the research study, please tell a member of the study staff. You do not need  
39 to explain why you want to leave.  
40

### 41 **Who to contact?**

42  
43 If you are not satisfied with the way this study was conducted, or if you have any concerns,  
44 complaints or general questions about your rights as a participant, please contact the Patient  
45 Attention Office at the Clínica Universidad de Navarra by phone (+34 948 255 400) or email  
46 [atpacientun@unav.es](mailto:atpacientun@unav.es) to talk with someone independent of the research team.  
47

48  
49 If you have any questions about this study or study procedures now or in the future, you can call Dr.  
50 Carlos Chaccour. Tel number: 628 659 003 who is the Principal Investigator of the study. You can call  
51 Monday-Friday from 8.00 to 17.00 hrs.  
52

53  
54 By signing the following informed consent, you agree to comply with the previously explained study  
55 procedures.  
56  
57  
58  
59  
60





1  
2  
3  
4  
5  
6  
7  
8  
9  
10  
11  
12  
13  
14  
15  
16  
17  
18  
19  
20  
21  
22  
23  
24  
25  
26  
27  
28  
29  
30  
31  
32  
33  
34  
35  
36  
37  
38  
39  
40  
41  
42  
43  
44  
45  
46  
47  
48  
49  
50  
51  
52  
53  
54  
55  
56  
57  
58  
59  
60

**Written informed consent form**

**Study title:** Acoustic surveillance and digital cough monitoring at population level for early respiratory disease outbreak detection, an exploratory observational study

**Promoter code**

Version and date:

I, (name and surname)

.....

Have read the information sheet presented above.  
I have been allowed to ask questions about the study.  
I have received sufficient information about the study to make a decision.

I have spoken to:

.....

(Name and surname of researcher)

I understand that my participation is voluntary.

I understand I can withdraw from the study:

- 1. Whenever I want to.
- 2. Without having to explain my reasons.
- 3. Without repercussions regarding my access to healthcare.

I freely and willingly accept to participate in this study. I give my consent for the access and usage of my data within the conditions previously detailed in the information sheet.

**Researcher's signature**

**Name:**

**Date:**

**Researcher's signature**

**Participant's signature**

**Signature of the legal representative or impartial witness (cross out if not applicable)**

**Name:**

**Name::**

**DNI:**

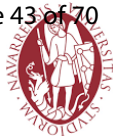

1  
2  
3  
4  
5  
6  
7  
8  
9  
10  
11  
12  
13  
14  
15  
16  
17  
18  
19  
20  
21  
22  
23  
24  
25  
26  
27  
28  
29  
30  
31  
32  
33  
34  
35  
36  
37  
38  
39  
40  
41  
42  
43  
44  
45  
46  
47  
48  
49  
50  
51  
52  
53  
54  
55  
56  
57  
58  
59  
60

**Date:**

**Date::**

**Date:**

**Reason to sign:**

This document will be signed in duplicate, one copy will be kept by the researcher and another one by the participant.

For peer review only



ID del participante:

**Hoja de información y autorización a menores de entre 13 y 18 años para participar en el estudio  
titulado:**

**Version 3.0 (6 de enero de 2021)**

*Vigilancia acústica y monitorización digital de la tos a nivel poblacional para la detección temprana  
de brotes de enfermedades respiratorias. Un estudio observacional exploratorio.*

Este formulario de autorización es para aquellos menores de edad dispuestos a participar en el estudio observacional previamente descrito.

**Promotor**

Clínica Universidad de Navarra/Universidad de Navarra, Avenida de Pío XII, 36  
31008 Pamplona.

**Financiación:** Este estudio está siendo financiado por el Centre Hospitalier de l'Université de Montreal (CHUM) y la fundación Patrick J. McGovern a través de una subvención otorgada al co-investigador Simon Grandjean Lapierre (*Early diagnosis of COVID-19 by utilizing Artificial Intelligence and Acoustic Monitoring*)

**Investigador Principal**

**Carlos Chaccour**

**Teléfono +34 666 293 112**

**Email [cchaccour@unav.es](mailto:cchaccour@unav.es)**

Este formulario de autorización cuenta con dos partes:

- Hoja de información (para compartir la información relevante al proyecto con usted)
- Certificado de Autorización (donde se le solicitará su firma y la de su padre, madre o representante legal, en caso de que acepte participar).

Le será proveída una copia del Certificado de Autorización.

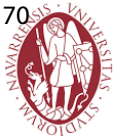

## Parte I: Hoja de Información

### Introducción

Nos dirigimos a usted para informarle sobre un estudio de investigación en el que se le invita a participar. El estudio ha sido aprobado por el Comité de Ética de la Investigación de la Universidad de Navarra, el comité de ética de la investigación con medicamentos de Navarra y el comité independiente de ética del Centre Hospitalier de l'Université de Montreal (CHUM), en Canadá.

No es necesario que tome una decisión hoy. Puede tomarse el tiempo de hablar y discutir su participación con cualquier persona con la que se sienta cómodo haciéndolo.

Con este documento pretendemos que usted reciba la información adecuada para que pueda entender de qué se trata este estudio y decidir si quiere o no participar en el mismo. Es posible que haya palabras o información que no entienda. De ser así, siéntase libre de preguntar cualquier duda.

### Generalidades del estudio

Los coronavirus son un grupo de virus que causan infecciones respiratorias generalmente leves. Sin embargo, un miembro de este grupo, el SARS-Cov-2, es el responsable de provocar la COVID-19, una enfermedad potencialmente peligrosa que desde finales del 2019 se ha extendido a lo largo de todo el mundo.

Uno de los elementos necesarios para contener el avance de la pandemia de COVID-19 es entender su escala real. Esto es particularmente importante ahora que los brotes regulares en zonas en las que simultáneamente ocurre transmisión a una menor escala se han convertido en una realidad. Uno de los mayores obstáculos de los sistemas sanitarios es la limitada capacidad de hacer pruebas diagnósticas, lo que se traduce en retrasos en la búsqueda de atención médica, así como en la recolección de la información necesaria para planear intervenciones que limiten la expansión de la enfermedad.

La gran mayoría de pacientes con COVID-19 presentan tos como un síntoma temprano de la enfermedad. Este estudio pretende evaluar la utilidad de una aplicación para el móvil, llamada HyfeApp, que registra y evalúa patrones de tos, como complemento a las estrategias de vigilancia epidemiológica existentes. Para esto, estimamos que será necesario grabar y analizar al menos 15,500 episodios individuales de tos.

Por eso esperamos que el mayor número posible de voluntarios instale la aplicación, la cual se ejecuta en segundo plano en el móvil. Aunque HyfeApp tiene acceso continuo al micrófono de su móvil, ha

sido diseñada para procesar únicamente sonidos compatibles con las características de la tos humana. Cuando uno de estos sonidos es detectado y grabado por la aplicación, un algoritmo de inteligencia artificial lo estudia y en caso de decidir qué se trata de un episodio de tos, se guarda junto a información sobre la ubicación geográfica y el momento en que ocurrió, que es proporcionada por el sistema GPS del móvil.

Aparte de la información suministrada por la aplicación, revisaremos los registros médicos de aquellas personas dispuestas a participar que acudan a consulta en el sistema nacional de salud, o la Clínica Universidad de Navarra. El objetivo de esto es recolectar información sobre la presencia de tos durante la exploración médica, o el diagnóstico de alguna enfermedad respiratoria en alguna de las visitas. Solo se consultará información relacionada con alguna de las siguientes condiciones:

- Tos no específica.
- Infecciones del tracto respiratorio superior.
- Faringitis.
- Asma.
- Bronquitis.
- Enfermedad Broncopulmonar Obstructiva Crónica (EBPOC).
- COVID-19
- Enfermedad por Reflujo Gastroesofágico (ERGE)
- Influenza
- Neumonía (por cualquier causa)
- Infección por virus sincitial respiratorio (VSR)
- Infecciones respiratorias inespecíficas.

Otros exámenes paraclínicos a ser recolectados incluyen:

- Microbiología
  - pruebas de COVID-19
  - PCR para influenza
  - Cultivo de esputo
- Hematología
  - Hematología completa
  - Prueba del dímero D.
- Bioquímica
  - Proteína C reactiva
  - Procalcitonina
  - CPK
  - LDH
  - Ferritina

Aparte de la información obtenida de la app y sus registros médicos, también le pediremos a un grupo reducido de participantes que formen parte de discusiones grupales focalizadas, para explorar los desafíos que representa el uso continuo de HyfeApp, y su participación en el estudio. En caso de que se le solicite participar, usted podrá aceptar o negarse.



## Duración

Se recolectará información inicialmente por un período de 1 mes, consultándosele en ese momento su disposición a seguir participando por 3 y 6 meses. Usted podrá negarse a seguir participando en el estudio en cualquier momento.

## Procedimientos del estudio

Usted no puede participar en el ensayo si usted:

- No puede o no quiere aceptar compartir su información codificada relacionada a sus registros de tos con bases de datos globales usadas para refinar los diagnósticos basados en perfiles acústicos.
- Si no posee un teléfono inteligente en el que se pueda ejecutar HyfeApp.
- Tiene menos de 13 años de edad.
- No es un estudiante/trabajador de la Universidad, o un paciente diagnosticado con una enfermedad causante de tos en la Clínica Universidad de Navarra.
- Si no reside en Navarra.

Si usted decide participar, un miembro de nuestro equipo lo ayudará a instalar la aplicación en su móvil. No serán necesarias nuevas visitas de parte del equipo de investigación, pero serán contactados una vez al mes para obtener comentarios sobre su experiencia usando la aplicación y ratificar su consentimiento y disposición a seguir participando en el estudio. También podrá ser contactado vía correo electrónico para recibir actualizaciones periódicas sobre el estado del proyecto y sus resultados preliminares.

### **La aplicación HyfeApp**

HyfeApp es una aplicación móvil disponible para los sistemas operativos Android y iOS (Apple), desarrollada por un equipo multidisciplinario que incluye analistas de datos, desarrolladores de software y médicos especialistas en enfermedades infecciosas.

### **¿Qué cosas hace HyfeApp?**

HyfeApp se ejecuta constantemente en el segundo plano de su móvil, sin interferir con el funcionamiento de otras aplicaciones, pero teniendo acceso a su micrófono y grabando recortes explosivos de sonido de menos de 0.5 segundos de duración. Ni las conversaciones, ni los sonidos de fondo son grabados. Estos recortes son enviados a un servidor, donde un algoritmo de inteligencia artificial identifica aquellos que presentan cambios súbitos y cortos en los decibeles, compatibles con episodios de tos. Posteriormente, otro algoritmo los procesa, evaluando otras características y determinando si efectivamente se trató de un episodio de tos. El servidor envía esta información de

1  
2  
3  
4  
5  
6  
7  
8  
9  
10  
11  
12  
13  
14  
15  
16  
17  
18  
19  
20  
21  
22  
23  
24  
25  
26  
27  
28  
29  
30  
31  
32  
33  
34  
35  
36  
37  
38  
39  
40  
41  
42  
43  
44  
45  
46  
47  
48  
49  
50  
51  
52  
53  
54  
55  
56  
57  
58  
59  
60

vuelta al móvil, de forma que los archivos clasificados como tos se incorporan a los registros mostrados por la aplicación.

HyfeApp es una herramienta que le proporciona información sobre su estado de bienestar. Tal como herramientas similares que cuentan calorías, registran el número de pasos o ronquidos. La única diferencia es que HyfeApp cuenta episodios de tos.

### **Beneficios y riesgos por su participación en estudio**

HyfeApp le permitirá llevar un registro del número de veces que tose al día, así como evidenciar cambios con respecto a días anteriores. Sin embargo, no es una herramienta de diagnóstico o tratamiento médico. Por lo tanto, ni provee información o consejos médicos, ni sustituye de ninguna forma a los servicios sanitarios: HyfeApp no es un instrumento médico especializado. Si usted tiene alguna duda sobre su estado de salud, debe consultarlas con un médico o en caso de emergencia, llamar a los servicios respectivos inmediatamente .

Grabar sonidos desde un móvil inmediatamente genera dudas sobre la forma en que será manejada la información, y garantizada la privacidad de los participantes. Como hemos explicado anteriormente, HyfeApp no graba conversaciones ni sonidos de ambiente. Los segmentos de 0.5 segundos grabados por la aplicación no permiten identificar a los participantes. Sin embargo, algunos de estos sonidos pudiesen permitir identificar al participante si son interpretados en conjunto con otra metadata registrada por la aplicación (como el número de teléfono, por ejemplo). Por esta razón, toda la información transmitida por la aplicación estará encriptada y manejada según los protocolos de seguridad estándar empleados en este tipo de estudios. De esta forma, únicamente los investigadores podrán asociar los datos recolectados por la aplicación, a otros elementos que permitan identificar a los participantes.

Usted no recibirá un pago por su participación.

### **Participación Voluntaria**

Debe saber que su participación en este estudio es voluntaria y que puede decidir no participar o cambiar su decisión y retirar la autorización en cualquier momento, sin que por ello se altere la relación con su médico ni se produzca perjuicio alguno en su tratamiento.

### **Pagos y Compensación Económica**

El promotor del estudio es el responsable de gestionar la financiación del mismo. Para la realización del estudio, el promotor ha firmado un contrato con el centro donde se va a realizar y con el médico del estudio.

Su participación en este estudio no le causará costes adicionales diferentes de los asociados a su tratamiento habitual. La asistencia rutinaria deberá ser pagada por la seguridad social, por su seguro médico o por usted mismo.

Ni usted ni sus padres/representantes recibirán un pago por su participación en este estudio.



## Otra Información

Cualquier nueva información referente a la aplicación utilizada en el estudio y que pueda afectar su disposición para participar en el mismo, que se descubra durante su participación, le será comunicada lo antes posible.

Si usted decide retirar el consentimiento para participar en este estudio no se añadirán nuevos datos a la base de datos y puede exigir la destrucción de cualquier información identificable previamente retenida, para evitar la realización de nuevos análisis.

También debe saber que puede ser excluido del estudio si el promotor y/o los investigadores del mismo lo consideran oportuno, ya sea por motivos de seguridad, por cualquier acontecimiento adverso derivado de su participación, o porque consideren que no está cumpliendo con los procedimientos establecidos. En cualquiera de los casos, usted recibirá una explicación adecuada del motivo que ha ocasionado su retirada del estudio.

## Confidencialidad

Toda la información recolectada en este estudio se mantendrá codificada, de forma que no pueda ser vinculada a sus datos personales. Solo el investigador principal y los co-investigadores sabrán su nombre y en cualquier documento o comunicación se usará un número de identificación personal asignado a cada participante. Las computadoras utilizadas para analizar los datos de este estudio tendrán contraseñas y solo investigadores autorizados podrán acceder a ellas.

La Universidad de Navarra, como responsable del tratamiento de datos, se compromete al cumplimiento de la Ley Orgánica del 3/2018, de 5 de diciembre y demás normativa de protección de datos en vigor. Por ello, es importante que conozca la siguiente información:

- Además de los derechos que ya conoce (acceso, modificación, oposición y cancelación de datos) ahora también puede limitar el tratamiento de datos que sean incorrectos, solicitar una copia o que se trasladen a un tercero (portabilidad) los datos que usted ha facilitado para el estudio. Para ejercer sus derechos, diríjase al Delegado de Protección de Datos de la institución en [protecciondedatosnav@unav.es]. Así mismo tiene derecho a dirigirse a la Agencia de Protección de Datos si no quedara satisfecho/a.
- Tanto el Centro como el Promotor son responsables respectivamente del tratamiento de sus datos y se comprometen a cumplir con la normativa de protección de datos en vigor. Los datos recogidos para el estudio estarán identificados mediante un código, de manera que no se incluya información que pueda identificarle, y sólo su médico del estudio/colaboradores podrá relacionar dichos datos con usted y con su historia clínica. Por lo tanto, su identidad no será revelada a ninguna otra persona salvo a las autoridades sanitarias, cuando así lo requieran o en casos de urgencia médica. Los Comités de Ética de la Investigación, los representantes de la Autoridad Sanitaria en materia de inspección y el personal autorizado por el Promotor, únicamente podrán acceder para comprobar los datos personales, los procedimientos del estudio clínico y el cumplimiento de las normas de buena práctica clínica (siempre manteniendo la confidencialidad de la información).



1  
2  
3  
4  
5  
6  
7  
8  
9  
• El Investigador y el Promotor están obligados a conservar los datos recogidos para el estudio al menos hasta 25 años tras su finalización. Posteriormente, su información personal sólo se conservará por el centro para el cuidado de su salud y por el promotor para otros fines de investigación científica si usted hubiera otorgado su consentimiento para ello, y si así lo permite la ley y requisitos éticos aplicables.

10  
11  
12  
13  
14  
15  
16  
• Si realizáramos transferencia de sus datos codificados fuera de la UE a las entidades de nuestro grupo, a prestadores de servicios o a investigadores científicos que colaboren con nosotros, los datos del participante quedarán protegidos con salvaguardas tales como contratos u otros mecanismos por las autoridades de protección de datos. Si el participante quiere saber más al respecto, puede contactar al Delegado de Protección de Datos del promotor [[protecciondedatosnav@unav.es](mailto:protecciondedatosnav@unav.es)].

### 17 18 **Compartiendo los Resultados**

19  
20  
21  
22  
23  
24  
25  
26  
27  
Usted tendrá acceso a todo el conocimiento generado por esta investigación en todo momento, solo debe preguntar al investigador principal. No compartiremos su nombre, estado de salud o dirección. Eventualmente, los resultados serán publicados, de forma tal que cualquier persona interesada en conocerlos, pueda acceder a ellos. Usted podrá solicitar información sobre el status y los resultados del estudio, preguntándole directamente al investigador principal.

### 28 **¿Quién aprobó esta investigación?**

29  
30  
31  
32  
33  
34  
El estudio ha sido aprobado por el Comité de Ética de la Investigación de la Universidad de Navarra, el comité de ética de la investigación con medicamentos de Navarra y el comité independiente de ética del Centre Hospitalier de l'Université de Montreal (CHUM), en Canadá.

### 35 **Derecho a negarse a participar o abandonar el estudio**

- 36  
37  
38  
39  
40  
41  
42  
43  
44  
45  
46  
47  
48  
49  
50
- No tiene que participar en este estudio si no desea hacerlo.
  - Tiene el derecho a NO firmar este formulario. Si no desea firmar este formulario, no podrá participar en este estudio de investigación. Esto se debe a que necesitamos su permiso por escrito antes de poder usar su información.
  - Tiene el derecho a abandonar este estudio incluso después de haber aceptado participar. Si decide abandonar el estudio, no usaremos su información. En caso de decidir abandonar el estudio, por favor comuníquese con un miembro de nuestro personal. No tiene que explicar sus razones para abandonar el estudio.

### 51 **A quién contactar**

52  
53  
54  
55  
56  
57  
58  
59  
60  
Si no está satisfecho con la forma en que se llevó a cabo este estudio, o tiene alguna duda, queja o pregunta sobre sus derechos como participante, por favor contacte a la oficina de atención al paciente de la Clínica Universidad de Navarra, por teléfono (+34 948 255 400) o correo electrónico ([atpacientun@unav.es](mailto:atpacientun@unav.es)), para hablar con alguien independiente del equipo investigador.



Si tiene alguna duda sobre este estudio o sus procedimientos, ahora o en el futuro, puede comunicarse con: Dr. Carlos Chaccour. Teléfono: 628 659 003. Quién es el investigador principal del estudio. Puede llamar de Lunes a Viernes entre las 8:00 y las 17:00 horas.

## Parte II: Certificado de Autorización

### Autorización del padre o representante legal

He leído o se me ha leído la información anterior. Se me permitió hacer preguntas al respecto y cualquier pregunta que haya hecho me fue contestada de forma satisfactoria.

Autorizo que mi hijo/hija o representado legal participe en este proyecto de investigación.

No autorizo que mi hijo/hija o representado legal participe en este proyecto de investigación y no he firmado la autorización presente a continuación.

Nombre del padre o representante legal:

Firma del padre o representante legal:

Fecha (dd/mm/aaaa)

### Consentimiento del menor de edad

He leído o se me ha leído la información anterior. Se me permitió hacer preguntas al respecto y cualquier pregunta que haya hecho me fue contestada de forma satisfactoria.

Acepto participar en este proyecto de investigación.

No acepto participar en este proyecto de investigación y no he firmado la autorización presente a continuación.

En caso de que el menor acepte participar:

Nombre del menor de edad:

Firma del menor de edad

Fecha (dd/mm/aaaa):

En caso de no saber leer o escribir

Un testigo que sepa leer o escribir debe firmar (este individuo debería de ser posible, haber sido elegido por el participante, no su padre o representante, y no estar relacionado con el equipo de

investigación). Todo participante que no sepa leer o escribir debe presentar la huella digital de su pulgar.

Soy testigo de que este formulario fue leído de forma precisa al participante en potencia, y que dicho individuo tuvo la oportunidad para hacer preguntas. Confirmando que el individuo en cuestión ha autorizado su participación de forma voluntaria.

Nombre del testigo:

Firma del testigo:

Fecha (dd/mm/aaaa):

Huella digital del pulgar del participante:

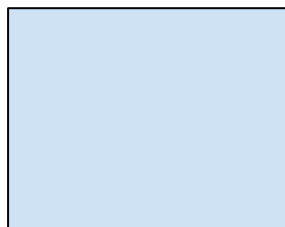

#### *Declaración del encargado de obtener la autorización*

He leído de forma precisa la hoja de información al participante en potencia, y he hecho todo lo posible para asegurarme de que entendiera que se realizarán los siguientes procedimientos:

1. La aplicación HyfeApp deberá ser descargada en el móvil del participante.
2. La aplicación HyfeApp registrará y almacenará sonidos compatibles con la tos humana durante un período de un año, entre octubre de 2020 y septiembre de 2021.
3. En caso de acudir a una consulta en el sistema nacional de salud, la información médica del participante podrá ser accedida para buscar evidencia clínica de tos o alguna enfermedad respiratoria.

Confirmando que al participante se le ha dado la oportunidad de hacer preguntas sobre la investigación y que todas esas preguntas han sido contestadas de forma apropiada y de la mejor forma posible. Confirmando que el individuo no ha sido forzado a autorizar su participación, y que su consentimiento ha sido libre y voluntario.

Una copia de este certificado de autorización ha sido proporcionada al padre o representante legal del participante.

El padre o representante legal del participante ha firmado el consentimiento informado: Si \_\_\_\_  
No \_\_\_\_

Nombre de la persona a cargo de obtener el consentimiento:

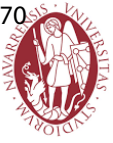

1  
2  
3  
4  
5  
6  
7  
8  
9  
10  
11  
12  
13  
14  
15  
16  
17  
18  
19  
20  
21  
22  
23  
24  
25  
26  
27  
28  
29  
30  
31  
32  
33  
34  
35  
36  
37  
38  
39  
40  
41  
42  
43  
44  
45  
46  
47  
48  
49  
50  
51  
52  
53  
54  
55  
56  
57  
58  
59  
60

Firma de la persona a cargo de obtener el consentimiento:

Fecha (dd/mm/aaaa):

For peer review only



English version

Participant ID:

**Information sheet and assent form for the participation of minors aged 13-18 years in the research study titled:**

Version 3.0 January 6<sup>th</sup>, 2021

*Acoustic surveillance and digital cough monitoring at population level for early respiratory disease outbreak detection, an exploratory observational study*

This assent form is meant for minors who are interested in taking part in the previously mentioned observational study. Please read this form carefully with your parents or legal guardian and ask any questions you might have.

**Promoter**

Clínica Universidad de Navarra/Universidad de Navarra, Avenida de Pío XII, 36  
31008 Pamplona.

**Funder**

This study is funded by the Centre Hospitalier de l'Université de Montreal (CHUM) and the Patrick J. McGovern Foundation through a grant awarded to Co-Investigator Simon Grandjean Lapierre (*Early diagnosis of COVID-19 by utilizing Artificial Intelligence and Acoustic Monitoring*)

**Main Researcher**

*Carlos Chaccour*  
*Teléfono +34 666 293 112*  
*Email cchaccour@unav.es*

This document consists of two parts:

- Information sheet (meant to explain relevant information regarding the project).
- Assent form (where we will require your signature, and that of your parent or legal guardian, if you decide to take part in it).

You will be provided a copy of this document for your personal records.

## Part I: Information sheet

### Introduction

The objective of this document is to inform you about the characteristics of a research study you have been invited to participate in. The study has been approved by the Committee of Research Ethics of the Universidad de Navarra and the Committee of Medication Ethics of Navarra (Spain), as well as the independent ethics committee from the Centre Hospitalier de l'Université de Montreal (CHUM), in Canada.

This document aims to provide you with proper information, so you can understand this study and decide by yourself if you are willing to take part or not in it. Please read this information document carefully and we will answer any questions that might come up afterwards. You can also discuss this with people you trust before making a decision.

### Objective of the research

Coronaviruses are a group of viruses that cause generally mild respiratory disease. However, a member of this group, the SARS-Cov-2, is responsible for causing COVID-19, a potentially dangerous disease that has spread across the globe since 2019.

One of the necessary interventions to contain the COVID-19 pandemic is understanding its real scale. This is particularly important now that new outbreaks are being regularly reported in areas with ongoing low-level transmission. A major limitation in this process is the limited diagnostic capabilities of many countries, which translates into delays in the search of medical attention and the collection of necessary epidemiological data.

Most patients with COVID-19 present cough as an early symptom of disease. This study aims to evaluate the usefulness of a mobile app called HyfeApp, which registers and studies cough patterns, as a complement to existing disease surveillance strategies. To do this, we will need to record and analyse about 15,500 individual episodes of cough. The town of Cizur Menor has been selected as the location of the initial studies of this new platform.

For this reason, we need as many people as possible installing the app, which runs in the background of your mobile. Although HyfeApp has continuous access to the mobile's mic, it has been designed to exclusively process sounds that match the characteristics of human cough. When one of these sounds is detected and recorded, an artificial intelligence algorithm studies it and where it determines it does sound like an episode of cough, the record is stored, along with geographical information and time, provided by the mobile's GPS.

Besides the information from the app, we will also review the medical records of those participants who present for a medical consultation in the national health system or the Clinica Universidad de Navarra. The objective of this is to collect information about the presence of cough, or any respiratory disease during one of those visits. Data from your medical chart will be obtained by the investigators from your local clinic or hospital. This includes without being limited to information related to any of the following conditions will be reviewed:

- Non-specific cough
- Non-specific upper respiratory tract infections
- Pharyngitis
- Asthma
- Bronchitis

- Chronic Obstructive Pulmonary Disease (COPD)
- COVID-19
- Gastro-esophageal reflux disease (GERD)
- Influenza
- Pneumonia (any cause)
- Respiratory Syncytial virus
- Non-specific respiratory tract infections

Additional laboratory test data to be captured from the selected visits includes:

- Microbiology
  - COVID-19 tests
  - Flu PCR
  - Sputum culture
- Hematology
  - Full blood count
  - D-dimer test
- Biochemistry
  - C-reactive protein
  - Procalcitonin
  - CPK
  - LDH
  - Ferritin

Besides the information from the app and medical charts, we will also solicit a restricted number of participants to participate in focus group discussions to explore the challenges related to using HyfeApp and participating in this study. If solicited, it will be your right to accept or refuse to participate in those focus groups.

### Duration

Data will be initially collected for a one-month period. You will then be offered the opportunity to continue in the study for 3 and 6 months. You can refuse continuing in the study at any point.

### Study Procedures

You will not be able to enroll in this study if you:

- Are incapable or unwilling to accept to share your codified cough data with multicenter databases aiming at refining acoustic-based diagnostics.
- Are under 13 years of age.
- Do not own a smartphone able to run HyfeApp.
- Are not a student/worker at the University of Navarra or a patient diagnosed with cough-related disease at the Clínica Universidad de Navarra.
- Are not a resident of Navarra

In case you decide to take part, a member of our team will help you install the app on your mobile. No further visits from the research team will be necessary. But you might be contacted once a month to collect feedback on your experience using the app, as well as to confirm your willingness to continue in the study. You might also receive periodic updates via email, to keep you informed on the status of the project and relevant preliminary results.

### About HyfeApp

HyfeApp is a mobile app available for Android and IOS (Apple) operative systems, developed by a multidisciplinary team of data scientists, software developers and infectious disease physicians.

### **What does HyfeApp do?**

HyfeApp runs in the background of your mobile, without interfering with any other running app, but having constant access to your mic and recording explosive sound snips of 0.5 seconds or less. No conversations, nor ambient sounds are recorded. These sound snips are sent to a server, where an artificial intelligence algorithm identifies those presenting sudden, shortchanges in decibel levels, compatible with cough episodes. Then, another algorithm processes them, evaluating its characteristics and determining if they were in fact, cough. The server then sends that data back to the mobile, so those files labeled as cough episodes are displayed by the app. HyfeApp is a wellness status tool. Just like similar apps that count calories, steps or snores. The only difference is that HyfeApp counts episodes of cough.

### **Benefits and risks of participating**

HyfeApp will allow you to have a record of the number of times you cough every day, and of any changes compared to previous days. However, it is not a diagnostic or treatment tool. Therefore, it does not provide medical advice, nor replaces healthcare services. HyfeApp is not medical equipment. If you ever have doubts regarding your health condition or status, you should consult a doctor, or in case of emergency, communicate with proper emergency services.

We are aware that recording sounds from a mobile phone generates doubts regarding the handling of information and the participants' privacy. As explained before, HyfeApp does not record conversations or ambient sounds, and the 0.5 second sound snips are too short to identify participants. However, if linked to other metadata (such as telephone numbers), these sounds could allow identification. For this reason, all the information transmitted by the app is encrypted and handled following standard safety protocols. This way, we can make sure that only the researchers can access potentially identifiable data.

You will not be paid for your participation.

### **Voluntary participation**

You must know that your participation in this study is voluntary and you can decide not to take part, or change your mind and resign your consent at any time in the future. This will not affect your relationship with your healthcare provider, nor harm your access to proper medical treatment in any way.

### **Economic Compensation**

The study promoter is responsible for managing the funds. Before, doing a research study, the promoter must have signed a contract with the center where the study will take place, and the doctors who will conduct the study. Your participation in this study will not cost you any extra money beyond your standard medical procedures. Routine medical assistance will have to be paid by the social security network, your medical insurance, or yourself.



1  
2  
3 You will not receive any payment or monetary compensation for taking  
4 part in this study.  
5

### 6 **Other information**

7 Any new information regarding the app to be used in this study and that could affect your disposition  
8 to take part in it, discovered after you have decided to participate, will be communicated to you as  
9 soon as possible.  
10  
11

12  
13  
14  
15 If you wish to withdraw your consent to take part in the study, no further personal data will be added  
16 to the database. You can also demand the destruction of any previously retained identifiable  
17 information, to prevent new analysis from being carried on.  
18

19  
20 You must also know that you could be excluded from the study if the promoter and/or researchers  
21 consider it to be adequate, either for your own safety, to prevent any adverse consequence deriving  
22 from your participation, or because they consider you are not complying with the established  
23 procedures. In any case, you will always receive a proper explanation of what caused your withdrawal  
24 from the study.  
25

### 26 **Confidentiality**

27 All the information collected in this study will be codified in such a way that they cannot be linked to  
28 your personal data. Only the main researcher and co-researchers will know your name, and an ID  
29 number will be used to refer to you in every document or communication. The computers used to  
30 store and analyse the data will be password-protected and only authorised researchers will have  
31 access to them.  
32  
33

34 The Clínica Universidad de Navarra, as the data controller, complies with the Organic Law 3/2018, of  
35 December 5, and other Spanish data protection regulations in force. Therefore, it is important that  
36 you know the following information:  
37

38  
39 • In addition to the rights that you already know (access, modification, refusal and cancellation of  
40 data), you can now also limit the processing of incorrect data, request a copy, or have the data that  
41 you provided be transferred to a third party (portability) for the study. To exercise your rights, contact  
42 the Institution's Data Protection Officer at [protecciondedatosnav@unav.es]. You also have the right  
43 to contact the Data Protection Agency if you are not satisfied.  
44

45  
46 • Both the Center and the Promoter are respectively responsible for the processing of your data and  
47 undertake to comply with the data protection regulations in force. The data collected for the study  
48 will be identified by a code, so that information that can identify you is not included, and only your  
49 study doctor / collaborators will be able to relate said data to you and to your medical history.  
50 Therefore, your identity will not be revealed to any other person except to the health authorities,  
51 when required, or in cases of medical emergency. The Research Ethics Committees, the  
52 representatives of the Health Authority in matters of inspection and the personnel authorized by the  
53 Sponsor, may only access to verify personal data, clinical study procedures and compliance with the  
54 rules of good clinical practice (always maintaining the confidentiality of the information).  
55

56  
57 • The Researcher and the Sponsor are obliged to keep the data collected for the study for at least 25  
58 years after its completion. Subsequently, your personal information will only be kept by the center for  
59  
60



the care of your health and by the promoter for other scientific research purposes if you have given your consent to do so, and if this is allowed by the law and applicable ethical requirements.

- If we transfer your encrypted data outside the EU to our group entities, service providers or scientific researchers who collaborate with us, the participant's data will be protected with safeguards such as contracts or other mechanisms by the protection authorities of data. If the participant wants to know more about it, he or she can contact the promoter's Data Protection Officer [protecciondedatosnav@unav.es].

### **Sharing the results**

At all time, you will have access to the knowledge we get from the research upon request to the principal investigator. We will not share your name, health status or where you live. After this, we will publish the results so that other interested people may learn from our research. You will be able to ask the status of this study and its findings by a direct request to the principal investigator.

### **Who approved this research?**

The study has been approved by the Committee of Research Ethics of the Universidad de Navarra and the Committee of Medication Ethics of Navarra (Spain), as well as the independent ethics committee from the Centre Hospitalaire de l'Université de Montreal (CHUM), in Canada.

### **Right to refuse or withdraw**

You don't have to take part in this research study if you do not wish so. You have the right not to sign this form. If you do not sign this form, you cannot take part in this research study. This is because we need your written permission to use your information. You have the right to leave the research study. If you would like to leave the research study, please tell a member of the study staff. You do not need to explain why you want to leave.

### **Who to contact?**

If you are not satisfied with the way this study was conducted, or if you have any concerns, complaints or general questions about your rights as a participant, please contact the Patient Attention Office at the Clínica Universidad de Navarra by phone (+34 948 255 400) or email [atpacientun@unav.es](mailto:atpacientun@unav.es) to talk with someone independent of the research team.

If you have any questions about this study or study procedures now or in the future, you can call Dr. Carlos Chaccour. Tel number 628 659 003 who is the Principal Investigator of the study. You can call Monday-Friday from 8.00 to 17.00 hrs.

## **Part II: Assent Form**

### **Authorization from the parent or legal guardian**

I have read, or have been read to the previous information. I was allowed to ask questions and I was provided with satisfactory answers to each one.

I authorize my child/minor under my care to take part in this research project.



I do not authorize my child/minor under my care to take part in this research project and I have not signed the Assent Form presented below.

Name of parent or legal guardian:

Signature of parent or legal guardian:

Date (dd/mm/yyyy):

**Consent from the minor**

I have read or have been read to the previous information. I was allowed to ask questions and I was provided with satisfactory answers to each one.

I accept to take part in this research project.

I do not accept to take part in this research project and I have not signed the assent form presented below.

In case the minor accepts to participate:

Name of minor:

Signature of minor:

Date (dd/mm/yyyy):

If illiterate:

A literate witness must sign this form (when possible, this person should be chosen by the participant and not be related to the research team). Every illiterate participant must still present a fingerprint of his/her thumb.

I confirm this form was properly and accurately read to the potential participant and that said individual has voluntarily consented to participate in the study.

Name of witness:

Signature of witness:

Date (dd/mm/yyyy):

Participant's fingerprint (thumb):

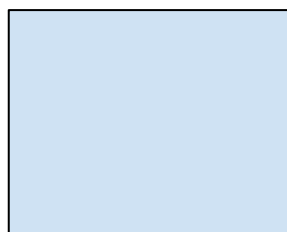

*Statement from the person responsible of getting written consent*



1  
2  
3 I have, to the best of my ability, read this information sheet to the  
4 potential participant and made my best effort to make sure he/she understood that the following  
5 procedures will be performed:  
6

- 7
1. HyfeApp will be downloaded to the participant's mobile phone.
  2. HyfeApp will register and store sounds that match the characteristics of human cough for a one-year period, between October 2020 and September 2021.
  3. If the participant seeks medical attention through the national health network, his/her medical records could be accessed by the researchers to look for evidence of cough or any respiratory disease.
- 14

15 I confirm the participant has been allowed to ask questions and that all his/her questions have been  
16 answered to the best of my ability. I confirm the participant has not been coerced to take part in this  
17 study and that his consent was free and voluntary.  
18

19  
20  
21 A copy of this form will be provided to the parent or legal guardian for personal records.  
22

23 Has the parent or legal guardian signed the assent form?: Yes \_\_\_\_ No \_\_\_\_  
24

25 Name of the person in charge of obtaining the participant's consent:  
26

27 Signature of the person in charge of obtaining the participant's consent:  
28

29 Date (dd/mm/yyyy):  
30  
31  
32  
33  
34  
35  
36  
37  
38  
39  
40  
41  
42  
43  
44  
45  
46  
47  
48  
49  
50  
51  
52  
53  
54  
55  
56  
57  
58  
59  
60



## Cuestionario complementario de información médica

Versión 2.0 (6 de enero, 2021)

## Información personal

Nombre: \_\_\_\_\_

Primer Apellido: \_\_\_\_\_

Segundo Apellido: \_\_\_\_\_

Fecha de nacimiento: \_\_\_\_\_

DNI: \_\_\_\_\_

Sistema operativo del móvil:

- Apple
- Android

Ciudad o pueblo \_\_\_\_\_ Avenida/Calle \_\_\_\_\_

Número \_\_\_\_\_ Escalera (izquierda o derecha, solo para departamentos) \_\_\_\_\_

Piso \_\_\_\_\_ Puerta \_\_\_\_\_

**¿Usualmente usted recibe atención médica a través de cuál de los siguientes proveedores de salud?**

- Público (Seguridad Social/Osasunbidea)  Ambos
- Privado (Clínica Universidad de Navarra)

**¿Ha sufrido usted de alguna de las siguientes condiciones en el pasado, o sufre de alguna en la actualidad?**

- Tos de causa no específica o desconocida
- Infecciones no especificadas de las vías respiratorias altas (Sinusitis, otitis, laringitis)
- Faringitis
- Asma
- Bronquitis
- Enfermedad broncopulmonar obstructiva crónica (EBPOC)
- COVID-19
- Enfermedad de Reflujo Gastroesofágico (ERGE)
- Influenza estacional



- Neumonía (sin importar la causa)
- Infección por virus sincitial respiratorio
- Otras infecciones no especificadas del tracto respiratorio inferior
- Fumador
- Otra condición

En caso de haber seleccionado la opción "Otra condición", por favor explique a continuación a que se refiere:

---

---

---

Peer review only

**English version****Medical Information Questionnaire for participants recruited at the University of Navarra****Version 2.0 (January 6<sup>th</sup>, 2021)****The following information must be filled by participants who have consented to take part in the study****Participant information**

Name: \_\_\_\_\_

First surname: \_\_\_\_\_

Second surname: \_\_\_\_\_

DOB: \_\_\_\_\_

DNI: \_\_\_\_\_

Participant's mobile operating system:

- Apple
- Android

Residence city \_\_\_\_\_ Street \_\_\_\_\_

Number \_\_\_\_\_ Stair (left or right, only for apartment buildings) \_\_\_\_\_

Floor \_\_\_\_\_ Door \_\_\_\_\_

**Participant contact**

Mobile phone: \_\_\_\_\_

Email: \_\_\_\_\_

**Usually, you receive medical care from which of the following providers?**

- Public health network (Social Security/Osasunbidea)
- Private (Clínica Universidad de Navarra)
- Both

**Please indicate if you have suffered from any of the following medical conditions**



- Non-specific cough
- Non-specific upper respiratory tract infections
- Acute pharyngitis
- Asthma
- Bronchitis
- Chronic Obstructive Pulmonary Disease (COPD)
- COVID-19
- Gastroesophageal Reflux Disease (GERD)
- Influenza
- Pneumonia (any cause)
- Respiratory Syncytial Virus Disease
- Another non-specific lower respiratory tract infection
- Smoker
- Other condition (please specify): \_\_\_\_\_





1  
2  
3  
4  
5  
6  
7  
8  
9  
10  
11  
12  
13  
14  
15  
16  
17  
18  
19  
20  
21  
22  
23  
24  
25  
26  
27  
28  
29  
30  
31  
32  
33  
34  
35  
36  
37  
38  
39  
40  
41  
42  
43  
44  
45  
46  
47  
48  
49  
50  
51  
52  
53  
54  
55  
56  
57  
58  
59  
60

For peer review only

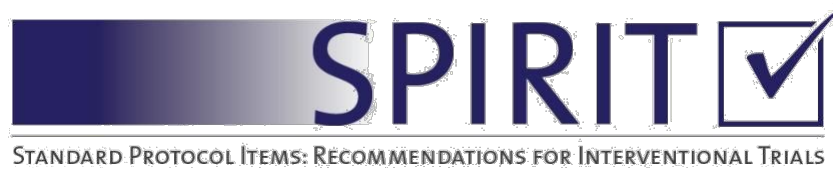

SPIRIT 2013 Checklist: Recommended items to address in a clinical trial protocol and related documents\*

**Section/item**      **Item No**      **Description**      Digital Acoustic Surveillance for Respiratory Disease Outbreak Early Detection: An Exploratory Observational Study in Navarra, Spain

**Administrative information**

|                            |    |                                                                                                                                                                                                                                                                                                        |   |
|----------------------------|----|--------------------------------------------------------------------------------------------------------------------------------------------------------------------------------------------------------------------------------------------------------------------------------------------------------|---|
| Title                      | 1  | Descriptive title identifying the study design, population, interventions, and, if applicable, trial acronym                                                                                                                                                                                           |   |
| Trial registration         | 2a | Trial identifier and registry name. If not yet registered, name of intended registry..... p. 3                                                                                                                                                                                                         | ✓ |
|                            | 2b | All items from the World Health Organization Trial Registration Data Set.....NA                                                                                                                                                                                                                        |   |
| Protocol version           | 3  | Date and version identifier..... NA                                                                                                                                                                                                                                                                    |   |
| Funding                    | 4  | Sources and types of financial, material, and other support..... P. 18                                                                                                                                                                                                                                 |   |
| Roles and responsibilities | 5a | Names, affiliations, and roles of protocol contributors..... p. 0, 18                                                                                                                                                                                                                                  |   |
|                            | 5b | Name and contact information for the trial sponsor.....p.0                                                                                                                                                                                                                                             |   |
|                            | 5c | Role of study sponsor and funders, if any, in study design; collection, management, analysis, and interpretation of data; writing of the report; and the decision to submit the report for publication, including whether they will have ultimate authority over any of these activities..... p. 18-19 |   |
|                            | 5d | Composition, roles, and responsibilities of the coordinating centre, steering committee, endpoint adjudication committee, data management team, and other individuals or groups overseeing the trial, if applicable (see Item 21a for data monitoring committee)..... NA                               |   |

**Introduction**

|                          |    |                                                                                                                                                                                                                     |  |
|--------------------------|----|---------------------------------------------------------------------------------------------------------------------------------------------------------------------------------------------------------------------|--|
| Background and rationale | 6a | Description of research question and justification for undertaking the trial, including summary of relevant studies (published and unpublished) examining benefits and harms for each intervention..... p.5-7       |  |
|                          | 6b | Explanation for choice of comparators..... p.5-7                                                                                                                                                                    |  |
| Objectives               | 7  | Specific objectives or hypotheses..... p.8                                                                                                                                                                          |  |
| Trial design             | 8  | Description of trial design including type of trial (eg, parallel group, crossover, factorial, single group), allocation ratio, and framework (eg, superiority, equivalence, noninferiority, exploratory)..... p. 7 |  |

## Methods: Participants, interventions, and outcomes

|                      |     |                                                                                                                                                                                                                                                                                                                                                                                              |
|----------------------|-----|----------------------------------------------------------------------------------------------------------------------------------------------------------------------------------------------------------------------------------------------------------------------------------------------------------------------------------------------------------------------------------------------|
| Study setting        | 9   | Description of study settings (eg, community clinic, academic hospital) and list of countries where data will be collected. Reference to where list of study sites can be obtained..... p.7                                                                                                                                                                                                  |
| Eligibility criteria | 10  | Inclusion and exclusion criteria for participants. If applicable, eligibility criteria for study centres and individuals who will perform the interventions (eg, surgeons, psychotherapists)..... p.8                                                                                                                                                                                        |
| Interventions        | 11a | Interventions for each group with sufficient detail to allow replication, including how and when they will be administered..... p.9-11                                                                                                                                                                                                                                                       |
|                      | 11b | Criteria for discontinuing or modifying allocated interventions for a given trial participant (eg, drug dose change in response to harms, participant request, or improving/worsening disease)..... NA                                                                                                                                                                                       |
|                      | 11c | Strategies to improve adherence to intervention protocols, and any procedures for monitoring adherence (eg, drug tablet return, laboratory tests).....p.9                                                                                                                                                                                                                                    |
|                      | 11d | Relevant concomitant care and interventions that are permitted or prohibited during the trial.....NA                                                                                                                                                                                                                                                                                         |
| Outcomes             | 12  | Primary, secondary, and other outcomes, including the specific measurement variable (eg, systolic blood pressure), analysis metric (eg, change from baseline, final value, time to event), method of aggregation (eg, median, proportion), and time point for each outcome. Explanation of the clinical relevance of chosen efficacy and harm outcomes is strongly recommended..... p-12-14. |
| Participant timeline | 13  | Time schedule of enrolment, interventions (including any run-ins and washouts), assessments, and visits for participants. A schematic diagram is highly recommended..... p. 7-8, Figure 1.                                                                                                                                                                                                   |
| Sample size          | 14  | Estimated number of participants needed to achieve study objectives and how it was determined, including clinical and statistical assumptions supporting any sample size calculations.....p.12                                                                                                                                                                                               |
| Recruitment          | 15  | Strategies for achieving adequate participant enrolment to reach target sample size.....p.7                                                                                                                                                                                                                                                                                                  |

## Methods: Assignment of interventions (for controlled trials)

### Allocation:

|                     |     |                                                                                                                                                                                                                                                                                                                                                                 |
|---------------------|-----|-----------------------------------------------------------------------------------------------------------------------------------------------------------------------------------------------------------------------------------------------------------------------------------------------------------------------------------------------------------------|
| Sequence generation | 16a | Method of generating the allocation sequence (eg, computer-generated random numbers), and list of any factors for stratification. To reduce predictability of a random sequence, details of any planned restriction (eg, blocking) should be provided in a separate document that is unavailable to those who enrol participants or assign interventions.....NA |
|---------------------|-----|-----------------------------------------------------------------------------------------------------------------------------------------------------------------------------------------------------------------------------------------------------------------------------------------------------------------------------------------------------------------|

|    |                |     |                                                                       |
|----|----------------|-----|-----------------------------------------------------------------------|
| 1  |                |     |                                                                       |
| 2  | Allocation 16b |     | Mechanism of implementing the allocation sequence (eg, central        |
| 3  | concealment    |     | telephone; sequentially numbered, opaque, sealed envelopes),          |
| 4  | mechanism      |     | describing any steps to conceal the sequence until interventions      |
| 5  |                |     | are assigned.....NA                                                   |
| 6  |                |     |                                                                       |
| 7  | Implementation | 16c | Who will generate the allocation sequence, who will enrol             |
| 8  |                |     | participants, and who will assign participants to                     |
| 9  |                |     | interventions.....NA                                                  |
| 10 |                |     |                                                                       |
| 11 | Blinding       |     |                                                                       |
| 12 | (masking)      | 17a | Who will be blinded after assignment to interventions (eg, trial      |
| 13 |                |     | participants, care providers, outcome assessors, data analysts), and  |
| 14 |                |     | How..... NA                                                           |
| 15 |                |     |                                                                       |
| 16 |                | 17b | If blinded, circumstances under which unblinding is permissible, and  |
| 17 |                |     | procedure for revealing a participant's allocated intervention during |
| 18 |                |     | the trial.....NA                                                      |
| 19 |                |     |                                                                       |

### Methods: Data collection, management, and analysis

|    |                 |     |                                                                          |
|----|-----------------|-----|--------------------------------------------------------------------------|
| 22 |                 |     |                                                                          |
| 23 | Data collection | 18a | Plans for assessment and collection of outcome, baseline, and other      |
| 24 | methods         |     | trial data, including any related processes to promote data quality (eg, |
| 25 |                 |     | duplicate measurements, training of assessors) and a description of      |
| 26 |                 |     | study instruments (eg, questionnaires, laboratory tests) along with      |
| 27 |                 |     | their reliability and validity, if known. Reference to where data        |
| 28 |                 |     | collection forms can be found, if not in the                             |
| 29 |                 |     | protocol.....p.8,12-14.                                                  |
| 30 |                 |     |                                                                          |
| 31 |                 |     |                                                                          |
| 32 |                 | 18b | Plans to promote participant retention and complete follow-up,           |
| 33 |                 |     | including list of any outcome data to be collected for participants who  |
| 34 |                 |     | discontinue or deviate from intervention protocols.....p.9.              |
| 35 |                 |     |                                                                          |
| 36 | Data            | 19  | Plans for data entry, coding, security, and storage, including any       |
| 37 | management      |     | related processes to promote data quality (eg, double data entry;        |
| 38 |                 |     | range checks for data values). Reference to where details of data        |
| 39 |                 |     | management procedures can be found, if not in the                        |
| 40 |                 |     | protocol.....p.13-14.                                                    |
| 41 |                 |     |                                                                          |
| 42 |                 |     |                                                                          |
| 43 | Statistical     | 20a | Statistical methods for analysing primary and secondary outcomes.        |
| 44 | methods         |     | Reference to where other details of the statistical analysis plan can be |
| 45 |                 |     | found, if not in the protocol.....p.12-14.                               |
| 46 |                 |     |                                                                          |
| 47 |                 | 20b | Methods for any additional analyses (eg, subgroup and adjusted           |
| 48 |                 |     | analyses).....p.13.                                                      |
| 49 |                 |     |                                                                          |
| 50 |                 | 20c | Definition of analysis population relating to protocol non-adherence     |
| 51 |                 |     | (eg, as randomised analysis), and any statistical methods to             |
| 52 |                 |     | handle missing data (eg, multiple imputation).....NA                     |
| 53 |                 |     |                                                                          |
| 54 |                 |     |                                                                          |

### Methods: Monitoring

|    |                 |     |                                                                         |
|----|-----------------|-----|-------------------------------------------------------------------------|
| 55 |                 |     |                                                                         |
| 56 |                 |     |                                                                         |
| 57 | Data monitoring | 21a | Composition of data monitoring committee (DMC); summary of its          |
| 58 |                 |     | role and reporting structure; statement of whether it is independent    |
| 59 |                 |     | from the sponsor and competing interests; and reference to where        |
| 60 |                 |     | further details about its charter can be found, if not in the protocol. |
|    |                 |     | Alternatively, an explanation of why a DMC is not                       |
|    |                 |     | needed.....NA.                                                          |

|    |                                 |     |                                                                                                                                                                                                                                                                                                 |
|----|---------------------------------|-----|-------------------------------------------------------------------------------------------------------------------------------------------------------------------------------------------------------------------------------------------------------------------------------------------------|
| 1  |                                 | 21b | Description of any interim analyses and stopping guidelines, including who will have access to these interim results and make the final decision to terminate the trial.....NA                                                                                                                  |
| 2  |                                 |     |                                                                                                                                                                                                                                                                                                 |
| 3  |                                 |     |                                                                                                                                                                                                                                                                                                 |
| 4  |                                 |     |                                                                                                                                                                                                                                                                                                 |
| 5  |                                 |     |                                                                                                                                                                                                                                                                                                 |
| 6  | Harms                           | 22  | Plans for collecting, assessing, reporting, and managing solicited and spontaneously reported adverse events and other unintended effects of trial interventions or trial conduct.....p.14                                                                                                      |
| 7  |                                 |     |                                                                                                                                                                                                                                                                                                 |
| 8  |                                 |     |                                                                                                                                                                                                                                                                                                 |
| 9  |                                 |     |                                                                                                                                                                                                                                                                                                 |
| 10 |                                 |     |                                                                                                                                                                                                                                                                                                 |
| 11 | Auditing                        | 23  | Frequency and procedures for auditing trial conduct, if any, and whether the process will be independent from investigators and the Sponsor.....NA.                                                                                                                                             |
| 12 |                                 |     |                                                                                                                                                                                                                                                                                                 |
| 13 |                                 |     |                                                                                                                                                                                                                                                                                                 |
| 14 |                                 |     |                                                                                                                                                                                                                                                                                                 |
| 15 |                                 |     |                                                                                                                                                                                                                                                                                                 |
| 16 | <b>Ethics and dissemination</b> |     |                                                                                                                                                                                                                                                                                                 |
| 17 |                                 |     |                                                                                                                                                                                                                                                                                                 |
| 18 | Research ethics approval        | 24  | Plans for seeking research ethics committee/institutional review board (REC/IRB) approval.....p.14                                                                                                                                                                                              |
| 19 |                                 |     |                                                                                                                                                                                                                                                                                                 |
| 20 |                                 |     |                                                                                                                                                                                                                                                                                                 |
| 21 | Protocol amendments             | 25  | Plans for communicating important protocol modifications (eg, changes to eligibility criteria, outcomes, analyses) to relevant parties (eg, investigators, REC/IRBs, trial participants, trial registries, journals, regulators).....p.14                                                       |
| 22 |                                 |     |                                                                                                                                                                                                                                                                                                 |
| 23 |                                 |     |                                                                                                                                                                                                                                                                                                 |
| 24 |                                 |     |                                                                                                                                                                                                                                                                                                 |
| 25 |                                 |     |                                                                                                                                                                                                                                                                                                 |
| 26 | Consent or assent               | 26a | Who will obtain informed consent or assent from potential trial participants or authorised surrogates, and how (see Item 32).....p.7-8                                                                                                                                                          |
| 27 |                                 |     |                                                                                                                                                                                                                                                                                                 |
| 28 |                                 |     |                                                                                                                                                                                                                                                                                                 |
| 29 |                                 |     |                                                                                                                                                                                                                                                                                                 |
| 30 |                                 |     |                                                                                                                                                                                                                                                                                                 |
| 31 |                                 | 26b | Additional consent provisions for collection and use of participant data and biological specimens in ancillary studies, if applicable.....NA                                                                                                                                                    |
| 32 |                                 |     |                                                                                                                                                                                                                                                                                                 |
| 33 |                                 |     |                                                                                                                                                                                                                                                                                                 |
| 34 | Confidentiality                 | 27  | How personal information about potential and enrolled participants will be collected, shared, and maintained in order to protect confidentiality before, during, and after the trial.....p.14                                                                                                   |
| 35 |                                 |     |                                                                                                                                                                                                                                                                                                 |
| 36 |                                 |     |                                                                                                                                                                                                                                                                                                 |
| 37 |                                 |     |                                                                                                                                                                                                                                                                                                 |
| 38 |                                 |     |                                                                                                                                                                                                                                                                                                 |
| 39 | Declaration of interests        | 28  | Financial and other competing interests for principal investigators for the overall trial and each study site.....p.19                                                                                                                                                                          |
| 40 |                                 |     |                                                                                                                                                                                                                                                                                                 |
| 41 |                                 |     |                                                                                                                                                                                                                                                                                                 |
| 42 | Access to data                  | 29  | Statement of who will have access to the final trial dataset, and disclosure of contractual agreements that limit such access for investigators..... Data share agreement included in the research agreement, but not in this submission.                                                       |
| 43 |                                 |     |                                                                                                                                                                                                                                                                                                 |
| 44 |                                 |     |                                                                                                                                                                                                                                                                                                 |
| 45 |                                 |     |                                                                                                                                                                                                                                                                                                 |
| 46 |                                 |     |                                                                                                                                                                                                                                                                                                 |
| 47 |                                 |     |                                                                                                                                                                                                                                                                                                 |
| 48 | Ancillary and post-trial care   | 30  | Provisions, if any, for ancillary and post-trial care, and for compensation to those who suffer harm from trial participation.....NA                                                                                                                                                            |
| 49 |                                 |     |                                                                                                                                                                                                                                                                                                 |
| 50 |                                 |     |                                                                                                                                                                                                                                                                                                 |
| 51 | Dissemination policy            | 31a | Plans for investigators and sponsor to communicate trial results to participants, healthcare professionals, the public, and other relevant groups (eg, via publication, reporting in results databases, or other data sharing arrangements), including any publication restrictions.....p.14-15 |
| 52 |                                 |     |                                                                                                                                                                                                                                                                                                 |
| 53 |                                 |     |                                                                                                                                                                                                                                                                                                 |
| 54 |                                 |     |                                                                                                                                                                                                                                                                                                 |
| 55 |                                 |     |                                                                                                                                                                                                                                                                                                 |
| 56 |                                 |     |                                                                                                                                                                                                                                                                                                 |
| 57 |                                 |     |                                                                                                                                                                                                                                                                                                 |
| 58 |                                 | 31b | Authorship eligibility guidelines and any intended use of professional writers.....p.18                                                                                                                                                                                                         |
| 59 |                                 |     |                                                                                                                                                                                                                                                                                                 |
| 60 |                                 |     |                                                                                                                                                                                                                                                                                                 |
|    |                                 | 31c | Plans, if any, for granting public access to the full protocol, participant-level dataset, and statistical code.....NA                                                                                                                                                                          |

## Appendices

|                            |    |                                                                                                                                                                                                       |
|----------------------------|----|-------------------------------------------------------------------------------------------------------------------------------------------------------------------------------------------------------|
| Informed consent materials | 32 | Model consent form and other related documentation given to participants and authorised surrogates..... Yes                                                                                           |
| Biological specimens       | 33 | Plans for collection, laboratory evaluation, and storage of biological specimens for genetic or molecular analysis in the current trial and for future use in ancillary studies, if applicable.....NA |

---

\*It is strongly recommended that this checklist be read in conjunction with the SPIRIT 2013 Explanation & Elaboration for important clarification on the items. Amendments to the protocol should be tracked and dated. The SPIRIT checklist is copyrighted by the SPIRIT Group under the Creative Commons "[Attribution-NonCommercial-NoDerivs 3.0 Unported](#)" license.
