# Supplementary material for: Digital acoustic surveillance for early detection of respiratory disease outbreaks in Spain: a protocol for an observational study
Source: PubMed Central journal article supplement — BMJ Open. 2021 Jul 2;11(7):e051278. doi: 10.1136/bmjopen-2021-051278 (PMC8257291; doi:10.1136/bmjopen-2021-051278), 2021-07-02
Supplement: bmjopen-2021-051278supp002.pdf [file bmjopen-2021-051278supp002.pdf]

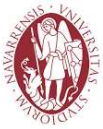

Universidad  
de Navarra

ID del participante:

**Hoja de información y autorización a menores de entre 13 y 18 años para participar en el estudio titulado:**

**Version 3.0 (6 de enero de 2021)**

*Vigilancia acústica y monitorización digital de la tos a nivel poblacional para la detección temprana de brotes de enfermedades respiratorias. Un estudio observacional exploratorio.*

Este formulario de autorización es para aquellos menores de edad dispuestos a participar en el estudio observacional previamente descrito.

**Promotor**

Clínica Universidad de Navarra/Universidad de Navarra, Avenida de Pío XII, 36  
31008 Pamplona.

**Financiación:** Este estudio está siendo financiado por el Centre Hospitalier de l'Université de Montreal (CHUM) y la fundación Patrick J. McGovern a través de una subvención otorgada al co-investigador Simon Grandjean Lapierre (*Early diagnosis of COVID-19 by utilizing Artificial Intelligence and Acoustic Monitoring*)

**Investigador Principal**

***Carlos Chaccour***

***Teléfono +34 666 293 112***

***Email cchaccour@unav.es***

Este formulario de autorización cuenta con dos partes:

- Hoja de información (para compartir la información relevante al proyecto con usted)
- Certificado de Autorización (donde se le solicitará su firma y la de su padre, madre o representante legal, en caso de que acepte participar).

Le será proveída una copia del Certificado de Autorización.



## Parte I: Hoja de Información

### Introducción

Nos dirigimos a usted para informarle sobre un estudio de investigación en el que se le invita a participar. El estudio ha sido aprobado por el Comité de Ética de la Investigación de la Universidad de Navarra, el comité de ética de la investigación con medicamentos de Navarra y el comité independiente de ética del Centre Hospitalier de l'Université de Montreal (CHUM), en Canadá.

No es necesario que tome una decisión hoy. Puede tomarse el tiempo de hablar y discutir su participación con cualquier persona con la que se sienta cómodo haciéndolo.

Con este documento pretendemos que usted reciba la información adecuada para que pueda entender de qué se trata este estudio y decidir si quiere o no participar en el mismo. Es posible que haya palabras o información que no entienda. De ser así, siéntase libre de preguntar cualquier duda.

### Generalidades del estudio

Los coronavirus son un grupo de virus que causan infecciones respiratorias generalmente leves. Sin embargo, un miembro de este grupo, el SARS-Cov-2, es el responsable de provocar la COVID-19, una enfermedad potencialmente peligrosa que desde finales del 2019 se ha extendido a lo largo de todo el mundo.

Uno de los elementos necesarios para contener el avance de la pandemia de COVID-19 es entender su escala real. Esto es particularmente importante ahora que los brotes regulares en zonas en las que simultáneamente ocurre transmisión a una menor escala se han convertido en una realidad. Uno de los mayores obstáculos de los sistemas sanitarios es la limitada capacidad de hacer pruebas diagnósticas, lo que se traduce en retrasos en la búsqueda de atención médica, así como en la recolección de la información necesaria para planear intervenciones que limiten la expansión de la enfermedad.

La gran mayoría de pacientes con COVID-19 presentan tos como un síntoma temprano de la enfermedad. Este estudio pretende evaluar la utilidad de una aplicación para el móvil, llamada HyfeApp, que registra y evalúa patrones de tos, como complemento a las estrategias de vigilancia epidemiológica existentes. Para esto, estimamos que será necesario grabar y analizar al menos 15,500 episodios individuales de tos.

Por eso esperamos que el mayor número posible de voluntarios instale la aplicación, la cual se ejecuta en segundo plano en el móvil. Aunque HyfeApp tiene acceso continuo al micrófono de su móvil, ha



sido diseñada para procesar únicamente sonidos compatibles con las características de la tos humana. Cuando uno de estos sonidos es detectado y grabado por la aplicación, un algoritmo de inteligencia artificial lo estudia y en caso de decidir qué se trata de un episodio de tos, se guarda junto a información sobre la ubicación geográfica y el momento en que ocurrió, que es proporcionada por el sistema GPS del móvil.

Aparte de la información suministrada por la aplicación, revisaremos los registros médicos de aquellas personas dispuestas a participar que acudan a consulta en el sistema nacional de salud, o la Clínica Universidad de Navarra. El objetivo de esto es recolectar información sobre la presencia de tos durante la exploración médica, o el diagnóstico de alguna enfermedad respiratoria en alguna de las visitas. Solo se consultará información relacionada con alguna de las siguientes condiciones:

- Tos no específica.
- Infecciones del tracto respiratorio superior.
- Faringitis.
- Asma.
- Bronquitis.
- Enfermedad Broncopulmonar Obstructiva Crónica (EBPOC).
- COVID-19
- Enfermedad por Reflujo Gastroesofágico (ERGE)
- Influenza
- Neumonía (por cualquier causa)
- Infección por virus sincitial respiratorio (VSR)
- Infecciones respiratorias inespecíficas.

Otros exámenes paraclínicos a ser recolectados incluyen:

- Microbiología
  - pruebas de COVID-19
  - PCR para influenza
  - Cultivo de esputo
- Hematología
  - Hematología completa
  - Prueba del dímero D.
- Bioquímica
  - Proteína C reactiva
  - Procalcitonina
  - CPK
  - LDH
  - Ferritina

Aparte de la información obtenida de la app y sus registros médicos, también le pediremos a un grupo reducido de participantes que formen parte de discusiones grupales focalizadas, para explorar los desafíos que representa el uso continuo de HyeApp, y su participación en el estudio. En caso de que se le solicite participar, usted podrá aceptar o negarse.

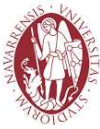

### **Duración**

Se recolectará información inicialmente por un período de 1 mes, consultándosele en ese momento su disposición a seguir participando por 3 y 6 meses. Usted podrá negarse a seguir participando en el estudio en cualquier momento.

### **Procedimientos del estudio**

Usted no puede participar en el ensayo si usted:

- No puede o no quiere aceptar compartir su información codificada relacionada a sus registros de tos con bases de datos globales usadas para refinar los diagnósticos basados en perfiles acústicos.
- Si no posee un teléfono inteligente en el que se pueda ejecutar HyfeApp.
- Tiene menos de 13 años de edad.
- No es un estudiante/trabajador de la Universidad, o un paciente diagnosticado con una enfermedad causante de tos en la Clínica Universidad de Navarra.
- Si no reside en Navarra.

Si usted decide participar, un miembro de nuestro equipo lo ayudará a instalar la aplicación en su móvil. No serán necesarias nuevas visitas de parte del equipo de investigación, pero serán contactados una vez al mes para obtener comentarios sobre su experiencia usando la aplicación y ratificar su consentimiento y disposición a seguir participando en el estudio. También podrá ser contactado vía correo electrónico para recibir actualizaciones periódicas sobre el estado del proyecto y sus resultados preliminares.

### ***La aplicación HyfeApp***

HyfeApp es una aplicación móvil disponible para los sistemas operativos Android y iOS (Apple), desarrollada por un equipo multidisciplinario que incluye analistas de datos, desarrolladores de software y médicos especialistas en enfermedades infecciosas.

### **¿Qué cosas hace HyfeApp?**

HyfeApp se ejecuta constantemente en el segundo plano de su móvil, sin interferir con el funcionamiento de otras aplicaciones, pero teniendo acceso a su micrófono y grabando recortes explosivos de sonido de menos de 0.5 segundos de duración. Ni las conversaciones, ni los sonidos de fondo son grabados. Estos recortes son enviados a un servidor, donde un algoritmo de inteligencia artificial identifica aquellos que presentan cambios súbitos y cortos en los decibeles, compatibles con episodios de tos. Posteriormente, otro algoritmo los procesa, evaluando otras características y determinando si efectivamente se trató de un episodio de tos. El servidor envía esta información de



Universidad  
de Navarra

vuelta al móvil, de forma que los archivos clasificados como tos se incorporan a los registros mostrados por la aplicación.

HyfeApp es una herramienta que le proporciona información sobre su estado de bienestar. Tal como herramientas similares que cuentan calorías, registran el número de pasos o ronquidos. La única diferencia es que HyfeApp cuenta episodios de tos.

### **Beneficios y riesgos por su participación en estudio**

HyfeApp le permitirá llevar un registro del número de veces que tose al día, así como evidenciar cambios con respecto a días anteriores. Sin embargo, no es una herramienta de diagnóstico o tratamiento médico. Por lo tanto, ni provee información o consejos médicos, ni sustituye de ninguna forma a los servicios sanitarios: HyfeApp no es un instrumento médico especializado. Si usted tiene alguna duda sobre su estado de salud, debe consultarlas con un médico o en caso de emergencia, llamar a los servicios respectivos inmediatamente .

Grabar sonidos desde un móvil inmediatamente genera dudas sobre la forma en que será manejada la información, y garantizada la privacidad de los participantes. Como hemos explicado anteriormente, HyfeApp no graba conversaciones ni sonidos de ambiente. Los segmentos de 0.5 segundos grabados por la aplicación no permiten identificar a los participantes. Sin embargo, algunos de estos sonidos pudiesen permitir identificar al participante si son interpretados en conjunto con otra metadata registrada por la aplicación (como el número de teléfono, por ejemplo). Por esta razón, toda la información transmitida por la aplicación estará encriptada y manejada según los protocolos de seguridad estándar empleados en este tipo de estudios. De esta forma, únicamente los investigadores podrán asociar los datos recolectados por la aplicación, a otros elementos que permitan identificar a los participantes.

Usted no recibirá un pago por su participación.

### **Participación Voluntaria**

Debe saber que su participación en este estudio es voluntaria y que puede decidir no participar o cambiar su decisión y retirar la autorización en cualquier momento, sin que por ello se altere la relación con su médico ni se produzca perjuicio alguno en su tratamiento.

### **Pagos y Compensación Económica**

El promotor del estudio es el responsable de gestionar la financiación del mismo. Para la realización del estudio, el promotor ha firmado un contrato con el centro donde se va a realizar y con el médico del estudio.

Su participación en este estudio no le causará costes adicionales diferentes de los asociados a su tratamiento habitual. La asistencia rutinaria deberá ser pagada por la seguridad social, por su seguro médico o por usted mismo.

Ni usted ni sus padres/representantes recibirán un pago por su participación en este estudio.



Universidad  
de Navarra

### Otra Información

Cualquier nueva información referente a la aplicación utilizada en el estudio y que pueda afectar su disposición para participar en el mismo, que se descubra durante su participación, le será comunicada lo antes posible.

Si usted decide retirar el consentimiento para participar en este estudio no se añadirán nuevos datos a la base de datos y puede exigir la destrucción de cualquier información identificable previamente retenida, para evitar la realización de nuevos análisis.

También debe saber que puede ser excluido del estudio si el promotor y/o los investigadores del mismo lo consideran oportuno, ya sea por motivos de seguridad, por cualquier acontecimiento adverso derivado de su participación, o porque consideren que no está cumpliendo con los procedimientos establecidos. En cualquiera de los casos, usted recibirá una explicación adecuada del motivo que ha ocasionado su retirada del estudio.

### Confidencialidad

Toda la información recolectada en este estudio se mantendrá codificada, de forma que no pueda ser vinculada a sus datos personales. Solo el investigador principal y los co-investigadores sabrán su nombre y en cualquier documento o comunicación se usará un número de identificación personal asignado a cada participante. Las computadoras utilizadas para analizar los datos de este estudio tendrán contraseñas y solo investigadores autorizados podrán acceder a ellas.

La Universidad de Navarra, como responsable del tratamiento de datos, se compromete al cumplimiento de la Ley Orgánica del 3/2018, de 5 de diciembre y demás normativa de protección de datos en vigor. Por ello, es importante que conozca la siguiente información:

- Además de los derechos que ya conoce (acceso, modificación, oposición y cancelación de datos) ahora también puede limitar el tratamiento de datos que sean incorrectos, solicitar una copia o que se trasladen a un tercero (portabilidad) los datos que usted ha facilitado para el estudio. Para ejercer sus derechos, diríjase al Delegado de Protección de Datos de la institución en [protecciondedatosnav@unav.es]. Así mismo tiene derecho a dirigirse a la Agencia de Protección de Datos si no quedara satisfecho/a.
- Tanto el Centro como el Promotor son responsables respectivamente del tratamiento de sus datos y se comprometen a cumplir con la normativa de protección de datos en vigor. Los datos recogidos para el estudio estarán identificados mediante un código, de manera que no se incluya información que pueda identificarle, y sólo su médico del estudio/colaboradores podrá relacionar dichos datos con usted y con su historia clínica. Por lo tanto, su identidad no será revelada a ninguna otra persona salvo a las autoridades sanitarias, cuando así lo requieran o en casos de urgencia médica. Los Comités de Ética de la Investigación, los representantes de la Autoridad Sanitaria en materia de inspección y el personal autorizado por el Promotor, únicamente podrán acceder para comprobar los datos personales, los procedimientos del estudio clínico y el cumplimiento de las normas de buena práctica clínica (siempre manteniendo la confidencialidad de la información).



Universidad  
de Navarra

- El Investigador y el Promotor están obligados a conservar los datos recogidos para el estudio al menos hasta 25 años tras su finalización. Posteriormente, su información personal sólo se conservará por el centro para el cuidado de su salud y por el promotor para otros fines de investigación científica si usted hubiera otorgado su consentimiento para ello, y si así lo permite la ley y requisitos éticos aplicables.

- Si realizáramos transferencia de sus datos codificados fuera de la UE a las entidades de nuestro grupo, a prestadores de servicios o a investigadores científicos que colaboren con nosotros, los datos del participante quedarán protegidos con salvaguardas tales como contratos u otros mecanismos por las autoridades de protección de datos. Si el participante quiere saber más al respecto, puede contactar al Delegado de Protección de Datos del promotor [[protecciondedatosnav@unav.es](mailto:protecciondedatosnav@unav.es)].

### Compartiendo los Resultados

Usted tendrá acceso a todo el conocimiento generado por esta investigación en todo momento, solo debe preguntar al investigador principal. No compartiremos su nombre, estado de salud o dirección. Eventualmente, los resultados serán publicados, de forma tal que cualquier persona interesada en conocerlos, pueda acceder a ellos. Usted podrá solicitar información sobre el status y los resultados del estudio, preguntándole directamente al investigador principal.

### ¿Quién aprobó esta investigación?

El estudio ha sido aprobado por el Comité de Ética de la Investigación de la Universidad de Navarra, el comité de ética de la investigación con medicamentos de Navarra y el comité independiente de ética del Centre Hospitalier de l'Université de Montreal (CHUM), en Canadá.

### Derecho a negarse a participar o abandonar el estudio

- No tiene que participar en este estudio si no desea hacerlo.
- Tiene el derecho a NO firmar este formulario. Si no desea firmar este formulario, no podrá participar en este estudio de investigación. Esto se debe a que necesitamos su permiso por escrito antes de poder usar su información.
- Tiene el derecho a abandonar este estudio incluso después de haber aceptado participar. Si decide abandonar el estudio, no usaremos su información. En caso de decidir abandonar el estudio, por favor comuníquese con un miembro de nuestro personal. No tiene que explicar sus razones para abandonar el estudio.

### A quién contactar

Si no está satisfecho con la forma en que se llevó a cabo este estudio, o tiene alguna duda, queja o pregunta sobre sus derechos como participante, por favor contacte a la oficina de atención al paciente de la Clínica Universidad de Navarra, por teléfono (+34 948 255 400) o correo electrónico ([atpacientun@unav.es](mailto:atpacientun@unav.es)), para hablar con alguien independiente del equipo investigador.



Universidad  
de Navarra

Si tiene alguna duda sobre este estudio o sus procedimientos, ahora o en el futuro, puede comunicarse con: Dr. Carlos Chaccour. Teléfono: 628 659 003. Quién es el investigador principal del estudio. Puede llamar de Lunes a Viernes entre las 8:00 y las 17:00 horas.

## Parte II: Certificado de Autorización

### Autorización del padre o representante legal

He leído o se me ha leído la información anterior. Se me permitió hacer preguntas al respecto y cualquier pregunta que haya hecho me fue contestada de forma satisfactoria.

- Autorizo que mi hijo/hija o representado legal participe en este proyecto de investigación.
- No autorizo que mi hijo/hija o representado legal participe en este proyecto de investigación y no he firmado la autorización presente a continuación.

Nombre del padre o representante legal:

Firma del padre o representante legal:

Fecha (dd/mm/aaaa)

### Consentimiento del menor de edad

He leído o se me ha leído la información anterior. Se me permitió hacer preguntas al respecto y cualquier pregunta que haya hecho me fue contestada de forma satisfactoria.

- Acepto participar en este proyecto de investigación.
- No acepto participar en este proyecto de investigación y no he firmado la autorización presente a continuación.

En caso de que el menor acepte participar:

Nombre del menor de edad:

Firma del menor de edad

Fecha (dd/mm/aaaa):

En caso de no saber leer o escribir

Un testigo que sepa leer o escribir debe firmar (este individuo debería de ser posible, haber sido elegido por el participante, no su padre o representante, y no estar relacionado con el equipo de





Universidad  
de Navarra

investigación). Todo participante que no sepa leer o escribir debe presentar la huella digital de su pulgar.

Soy testigo de que este formulario fue leído de forma precisa al participante en potencia, y que dicho individuo tuvo la oportunidad para hacer preguntas. Confirmando que el individuo en cuestión ha autorizado su participación de forma voluntaria.

Nombre del testigo:

Firma del testigo:

Fecha (dd/mm/aaaa):

Huella digital del pulgar del participante:

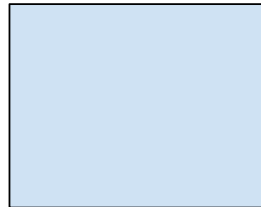

#### *Declaración del encargado de obtener la autorización*

He leído de forma precisa la hoja de información al participante en potencia, y he hecho todo lo posible para asegurarme de que entendiera que se realizarán los siguientes procedimientos:

1. La aplicación HyfeApp deberá ser descargada en el móvil del participante.
2. La aplicación HyfeApp registrará y almacenará sonidos compatibles con la tos humana durante un período de un año, entre octubre de 2020 y septiembre de 2021.
3. En caso de acudir a una consulta en el sistema nacional de salud, la información médica del participante podrá ser accedida para buscar evidencia clínica de tos o alguna enfermedad respiratoria.

Confirmando que al participante se le ha dado la oportunidad de hacer preguntas sobre la investigación y que todas esas preguntas han sido contestadas de forma apropiada y de la mejor forma posible. Confirmando que el individuo no ha sido forzado a autorizar su participación, y que su consentimiento ha sido libre y voluntario.

Una copia de este certificado de autorización ha sido proporcionada al padre o representante legal del participante.

El padre o representante legal del participante ha firmado el consentimiento informado: Si \_\_\_\_\_  
No \_\_\_\_\_

Nombre de la persona a cargo de obtener el consentimiento:

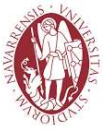

Universidad  
de Navarra

Firma de la persona a cargo de obtener el consentimiento:

Fecha (dd/mm/aaaa):



Universidad  
de Navarra

**English version**

Participant ID:

**Information sheet and assent form for the participation of minors aged 13-18 years in the research study titled:**

Version 3.0 January 6<sup>th</sup>, 2021

*Acoustic surveillance and digital cough monitoring at population level for early respiratory disease outbreak detection, an exploratory observational study*

This assent form is meant for minors who are interested in taking part in the previously mentioned observational study. Please read this form carefully with your parents or legal guardian and ask any questions you might have.

**Promoter**

Clínica Universidad de Navarra/Universidad de Navarra, Avenida de Pío XII, 36  
31008 Pamplona.

**Funder**

This study is funded by the Centre Hospitalier de l'Université de Montreal (CHUM) and the Patrick J. McGovern Foundation through a grant awarded to Co-Investigator Simon Grandjean Lapiere (*Early diagnosis of COVID-19 by utilizing Artificial Intelligence and Acoustic Monitoring*)

**Main Researcher**

*Carlos Chaccour*  
*Teléfono +34 666 293 112*  
*Email cchaccour@unav.es*

This document consists of two parts:

- Information sheet (meant to explain relevant information regarding the project).
- Assent form (where we will require your signature, and that of your parent or legal guardian, if you decide to take part in it).

You will be provided a copy of this document for your personal records.

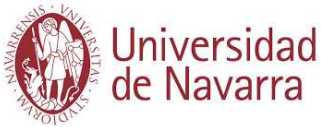

## Part I: Information sheet

### Introduction

The objective of this document is to inform you about the characteristics of a research study you have been invited to participate in. The study has been approved by the Committee of Research Ethics of the Universidad de Navarra and the Committee of Medication Ethics of Navarra (Spain), as well as the independent ethics committee from the Centre Hospitalier de l'Université de Montreal (CHUM), in Canada.

This document aims to provide you with proper information, so you can understand this study and decide by yourself if you are willing to take part or not in it. Please read this information document carefully and we will answer any questions that might come up afterwards. You can also discuss this with people you trust before making a decision.

### Objective of the research

Coronaviruses are a group of viruses that cause generally mild respiratory disease. However, a member of this group, the SARS-Cov-2, is responsible for causing COVID-19, a potentially dangerous disease that has spread across the globe since 2019.

One of the necessary interventions to contain the COVID-19 pandemic is understanding its real scale. This is particularly important now that new outbreaks are being regularly reported in areas with ongoing low-level transmission. A major limitation in this process is the limited diagnostic capabilities of many countries, which translates into delays in the search of medical attention and the collection of necessary epidemiological data.

Most patients with COVID-19 present cough as an early symptom of disease. This study aims to evaluate the usefulness of a mobile app called HyfeApp, which registers and studies cough patterns, as a complement to existing disease surveillance strategies. To do this, we will need to record and analyse about 15,500 individual episodes of cough. The town of Cizur Menor has been selected as the location of the initial studies of this new platform.

For this reason, we need as many people as possible installing the app, which runs in the background of your mobile. Although HyfeApp has continuous access to the mobile's mic, it has been designed to exclusively process sounds that match the characteristics of human cough. When one of these sounds is detected and recorded, an artificial intelligence algorithm studies it and where it determines it does sound like an episode of cough, the record is stored, along with geographical information and time, provided by the mobile's GPS.

Besides the information from the app, we will also review the medical records of those participants who present for a medical consultation in the national health system or the Clinica Universidad de Navarra. The objective of this is to collect information about the presence of cough, or any respiratory disease during one of those visits. Data from your medical chart will be obtained by the investigators from your local clinic or hospital. This includes without being limited to information related to any of the following conditions will be reviewed:

- Non-specific cough
- Non-specific upper respiratory tract infections
- Pharyngitis
- Asthma
- Bronchitis



Universidad  
de Navarra

- Chronic Obstructive Pulmonary Disease (COPD)
- COVID-19
- Gastro-esophageal reflux disease (GERD)
- Influenza
- Pneumonia (any cause)
- Respiratory Syncytial virus
- Non-specific respiratory tract infections

Additional laboratory test data to be captured from the selected visits includes:

- Microbiology
  - COVID-19 tests
  - Flu PCR
  - Sputum culture
- Hematology
  - Full blood count
  - D-dimer test
- Biochemistry
  - C-reactive protein
  - Procalcitonin
  - CPK
  - LDH
  - Ferritin

Besides the information from the app and medical charts, we will also solicit a restricted number of participants to participate in focus group discussions to explore the challenges related to using HyfeApp and participating in this study. If solicited, it will be your right to accept or refuse to participate in those focus groups.

#### **Duration**

Data will be initially collected for a one-month period. You will then be offered the opportunity to continue in the study for 3 and 6 months. You can refuse continuing in the study at any point.

#### **Study Procedures**

You will not be able to enroll in this study if you:

- Are incapable or unwilling to accept to share your codified cough data with multicenter databases aiming at refining acoustic-based diagnostics.
- Are under 13 years of age.
- Do not own a smartphone able to run HyfeApp.
- Are not a student/worker at the University of Navarra or a patient diagnosed with cough-related disease at the Clínica Universidad de Navarra.
- Are not a resident of Navarra

In case you decide to take part, a member of our team will help you install the app on your mobile. No further visits from the research team will be necessary. But you might be contacted once a month to collect feedback on your experience using the app, as well as to confirm your willingness to continue in the study. You might also receive periodic updates via email, to keep you informed on the status of the project and relevant preliminary results.

#### **About HyfeApp**



Universidad  
de Navarra

HyfeApp is a mobile app available for Android and IOS (Apple) operative systems, developed by a multidisciplinary team of data scientists, software developers and infectious disease physicians.

### **What does HyfeApp do?**

HyfeApp runs in the background of your mobile, without interfering with any other running app, but having constant access to your mic and recording explosive sound snips of 0.5 seconds or less. No conversations, nor ambient sounds are recorded. These sound snips are sent to a server, where an artificial intelligence algorithm identifies those presenting sudden, shortchanges in decibel levels, compatible with cough episodes. Then, another algorithm processes them, evaluating its characteristics and determining if they were in fact, cough. The server then sends that data back to the mobile, so those files labeled as cough episodes are displayed by the app. HyfeApp is a wellness status tool. Just like similar apps that count calories, steps or snores. The only difference is that HyfeApp counts episodes of cough.

### **Benefits and risks of participating**

HyfeApp will allow you to have a record of the number of times you cough every day, and of any changes compared to previous days. However, it is not a diagnostic or treatment tool. Therefore, it does not provide medical advice, nor replaces healthcare services. HyfeApp is not medical equipment. If you ever have doubts regarding your health condition or status, you should consult a doctor, or in case of emergency, communicate with proper emergency services.

We are aware that recording sounds from a mobile phone generates doubts regarding the handling of information and the participants' privacy. As explained before, HyfeApp does not record conversations or ambient sounds, and the 0.5 second sound snips are too short to identify participants. However, if linked to other metadata (such as telephone numbers), these sounds could allow identification. For this reason, all the information transmitted by the app is encrypted and handled following standard safety protocols. This way, we can make sure that only the researchers can access potentially identifiable data.

You will not be paid for your participation.

### **Voluntary participation**

You must know that your participation in this study is voluntary and you can decide not to take part, or change your mind and resign your consent at any time in the future. This will not affect your relationship with your healthcare provider, nor harm your access to proper medical treatment in any way.

### **Economic Compensation**

The study promoter is responsible for managing the funds. Before, doing a research study, the promoter must have signed a contract with the center where the study will take place, and the doctors who will conduct the study. Your participation in this study will not cost you any extra money beyond your standard medical procedures. Routine medical assistance will have to be paid by the social security network, your medical insurance, or yourself.

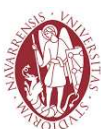

Universidad  
de Navarra

You will not receive any payment or monetary compensation for taking part in this study.

#### **Other information**

Any new information regarding the app to be used in this study and that could affect your disposition to take part in it, discovered after you have decided to participate, will be communicated to you as soon as possible.

If you wish to withdraw your consent to take part in the study, no further personal data will be added to the database. You can also demand the destruction of any previously retained identifiable information, to prevent new analysis from being carried on.

You must also know that you could be excluded from the study if the promoter and/or researchers consider it to be adequate, either for your own safety, to prevent any adverse consequence deriving from your participation, or because they consider you are not complying with the established procedures. In any case, you will always receive a proper explanation of what caused your withdrawal from the study.

#### **Confidentiality**

All the information collected in this study will be codified in such a way that they cannot be linked to your personal data. Only the main researcher and co-researchers will know your name, and an ID number will be used to refer to you in every document or communication. The computers used to store and analyse the data will be password-protected and only authorised researchers will have access to them.

The Clínica Universidad de Navarra, as the data controller, complies with the Organic Law 3/2018, of December 5, and other Spanish data protection regulations in force. Therefore, it is important that you know the following information:

- In addition to the rights that you already know (access, modification, refusal and cancellation of data), you can now also limit the processing of incorrect data, request a copy, or have the data that you provided be transferred to a third party (portability) for the study. To exercise your rights, contact the Institution's Data Protection Officer at [protecciondedatosnav@unav.es]. You also have the right to contact the Data Protection Agency if you are not satisfied.
- Both the Center and the Promoter are respectively responsible for the processing of your data and undertake to comply with the data protection regulations in force. The data collected for the study will be identified by a code, so that information that can identify you is not included, and only your study doctor / collaborators will be able to relate said data to you and to your medical history. Therefore, your identity will not be revealed to any other person except to the health authorities, when required, or in cases of medical emergency. The Research Ethics Committees, the representatives of the Health Authority in matters of inspection and the personnel authorized by the Sponsor, may only access to verify personal data, clinical study procedures and compliance with the rules of good clinical practice (always maintaining the confidentiality of the information).
- The Researcher and the Sponsor are obliged to keep the data collected for the study for at least 25 years after its completion. Subsequently, your personal information will only be kept by the center for



Universidad  
de Navarra

the care of your health and by the promoter for other scientific research purposes if you have given your consent to do so, and if this is allowed by the law and applicable ethical requirements.

- If we transfer your encrypted data outside the EU to our group entities, service providers or scientific researchers who collaborate with us, the participant's data will be protected with safeguards such as contracts or other mechanisms by the protection authorities of data. If the participant wants to know more about it, he or she can contact the promoter's Data Protection Officer [protecciondedatosnav@unav.es].

### **Sharing the results**

At all time, you will have access to the knowledge we get from the research upon request to the principal investigator. We will not share your name, health status or where you live. After this, we will publish the results so that other interested people may learn from our research. You will be able to ask the status of this study and its findings by a direct request to the principal investigator.

### **Who approved this research?**

The study has been approved by the Committee of Research Ethics of the Universidad de Navarra and the Committee of Medication Ethics of Navarra (Spain), as well as the independent ethics committee from the Centre Hospitalaire de l'Université de Montreal (CHUM), in Canada.

### **Right to refuse or withdraw**

You don't have to take part in this research study if you do not wish so. You have the right not to sign this form. If you do not sign this form, you cannot take part in this research study. This is because we need your written permission to use your information. You have the right to leave the research study. If you would like to leave the research study, please tell a member of the study staff. You do not need to explain why you want to leave.

### **Who to contact?**

If you are not satisfied with the way this study was conducted, or if you have any concerns, complaints or general questions about your rights as a participant, please contact the Patient Attention Office at the Clínica Universidad de Navarra by phone (+34 948 255 400) or email [atpacientun@unav.es](mailto:atpacientun@unav.es) to talk with someone independent of the research team.

If you have any questions about this study or study procedures now or in the future, you can call Dr. Carlos Chaccour. Tel number 628 659 003 who is the Principal Investigator of the study. You can call Monday-Friday from 8.00 to 17.00 hrs.

### **Part II: Assent Form**

#### **Authorization from the parent or legal guardian**

I have read, or have been read to the previous information. I was allowed to ask questions and I was provided with satisfactory answers to each one.

I authorize my child/minor under my care to take part in this research project.





Universidad  
de Navarra

I do not authorize my child/minor under my care to take part in this research project and I have not signed the Assent Form presented below.

Name of parent or legal guardian:

Signature of parent or legal guardian:

Date (dd/mm/yyyy):

**Consent from the minor**

I have read or have been read to the previous information. I was allowed to ask questions and I was provided with satisfactory answers to each one.

I accept to take part in this research project.

I do not accept to take part in this research project and I have not signed the assent form presented below.

In case the minor accepts to participate:

Name of minor:

Signature of minor:

Date (dd/mm/yyyy):

If illiterate:

A literate witness must sign this form (when possible, this person should be chosen by the participant and not be related to the research team). Every illiterate participant must still present a fingerprint of his/her thumb.

I confirm this form was properly and accurately read to the potential participant and that said individual has voluntarily consented to participate in the study.

Name of witness:

Signature of witness:

Date (dd/mm/yyyy):

Participant's fingerprint (thumb):

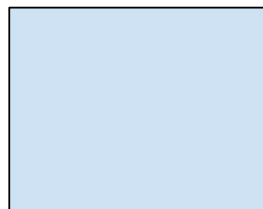

*Statement from the person responsible of getting written consent*



Universidad  
de Navarra

I have, to the best of my ability, read this information sheet to the potential participant and made my best effort to make sure he/she understood that the following procedures will be performed:

1. HyfeApp will be downloaded to the participant's mobile phone.
2. HyfeApp will register and store sounds that match the characteristics of human cough for a one-year period, between October 2020 and September 2021.
3. If the participant seeks medical attention through the national health network, his/her medical records could be accessed by the researchers to look for evidence of cough or any respiratory disease.

I confirm the participant has been allowed to ask questions and that all his/her questions have been answered to the best of my ability. I confirm the participant has not been coerced to take part in this study and that his consent was free and voluntary.

A copy of this form will be provided to the parent or legal guardian for personal records.

Has the parent or legal guardian signed the assent form?: Yes \_\_\_\_\_ No \_\_\_\_\_

Name of the person in charge of obtaining the participant's consent:

Signature of the person in charge of obtaining the participant's consent:

Date (dd/mm/yyyy):
