# Supplementary material for: Digital acoustic surveillance for early detection of respiratory disease outbreaks in Spain: a protocol for an observational study
Source: PubMed Central journal article supplement — BMJ Open. 2021 Jul 2;11(7):e051278. doi: 10.1136/bmjopen-2021-051278 (PMC8257291; doi:10.1136/bmjopen-2021-051278), 2021-07-02
Supplement: bmjopen-2021-051278supp003.pdf [file bmjopen-2021-051278supp003.pdf]

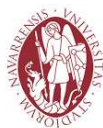

Universidad  
de Navarra

**Cuestionario complementario de información médica**

**Versión 2.0 (6 de enero, 2021)**

**Información personal**

Nombre: \_\_\_\_\_

Primer Apellido: \_\_\_\_\_

Segundo Apellido: \_\_\_\_\_

Fecha de nacimiento: \_\_\_\_\_

DNI: \_\_\_\_\_

Sistema operativo del móvil:

- Apple
- Android

Ciudad o pueblo \_\_\_\_\_ Avenida/Calle \_\_\_\_\_

Número \_\_\_\_\_ Escalera (izquierda o derecha, solo para departamentos) \_\_\_\_\_

Piso \_\_\_\_\_ Puerta \_\_\_\_\_

**¿Usualmente usted recibe atención médica a través de cuál de los siguientes proveedores de salud?**

- Público (Seguridad Social/Osasunbidea)
- Ambos
- Privado (Clínica Universidad de Navarra)

**¿Ha sufrido usted de alguna de las siguientes condiciones en el pasado, o sufre de alguna en la actualidad?**

- Tos de causa no específica o desconocida
- Infecciones no especificadas de las vías respiratorias altas (Sinusitis, otitis, laringitis)
- Faringitis
- Asma
- Bronquitis
- Enfermedad broncopulmonar obstructiva crónica (EBPOC)
- COVID-19
- Enfermedad de Reflujo Gastroesofágico (ERGE)
- Influenza estacional

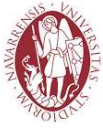

Universidad  
de Navarra

- Neumonía (sin importar la causa)
- Infección por virus sincitial respiratorio
- Otras infecciones no especificadas del tracto respiratorio inferior
- Fumador
- Otra condición

En caso de haber seleccionado la opción "Otra condición", por favor explique a continuación a que se refiere:

---

---

---

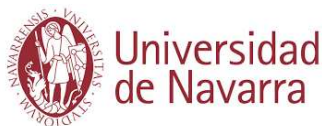**English version****Medical Information Questionnaire for participants recruited at the University of Navarra****Version 2.0 (January 6<sup>th</sup>, 2021)****The following information must be filled by participants who have consented to take part in the study****Participant information**

Name: \_\_\_\_\_

First surname: \_\_\_\_\_

Second surname: \_\_\_\_\_

DOB: \_\_\_\_\_

DNI: \_\_\_\_\_

Participant's mobile operating system:

- Apple
- Android

Residence city \_\_\_\_\_ Street \_\_\_\_\_

Number \_\_\_\_\_ Stair (left or right, only for apartment buildings) \_\_\_\_\_

Floor \_\_\_\_\_ Door \_\_\_\_\_

**Participant contact**

Mobile phone: \_\_\_\_\_

Email: \_\_\_\_\_

**Usually, you receive medical care from which of the following providers?**

- Public health network (Social Security/Osasunbidea)
- Private (Clínica Universidad de Navarra)
- Both

**Please indicate if you have suffered from any of the following medical conditions**



Universidad  
de Navarra

- Non-specific cough
- Non-specific upper respiratory tract infections
- Acute pharyngitis
- Asthma
- Bronchitis
- Chronic Obstructive Pulmonary Disease (COPD)
- COVID-19
- Gastroesophageal Reflux Disease (GERD)
- Influenza
- Pneumonia (any cause)
- Respiratory Syncytial Virus Disease
- Another non-specific lower respiratory tract infection
- Smoker
- Other condition (please specify): \_\_\_\_\_

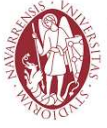

Universidad  
de Navarra
